# Supplementary material for: The Orthologue of the Fruitfly Sex Behaviour Gene Fruitless in the Mosquito Aedes aegypti: Evolution of Genomic Organisation and Alternative Splicing
Source: PubMed Central journal article supplement (PMC3572092; doi:10.1371/journal.pone.0048554), 2013-02-13
Supplement: pone.0048554.s001.pdf [file pone.0048554.s001.pdf]

# Figure S1 – Censor analysis of *Aeafru* introns

## Intron 1

Length: 424374 Bp

Censor graphic output:

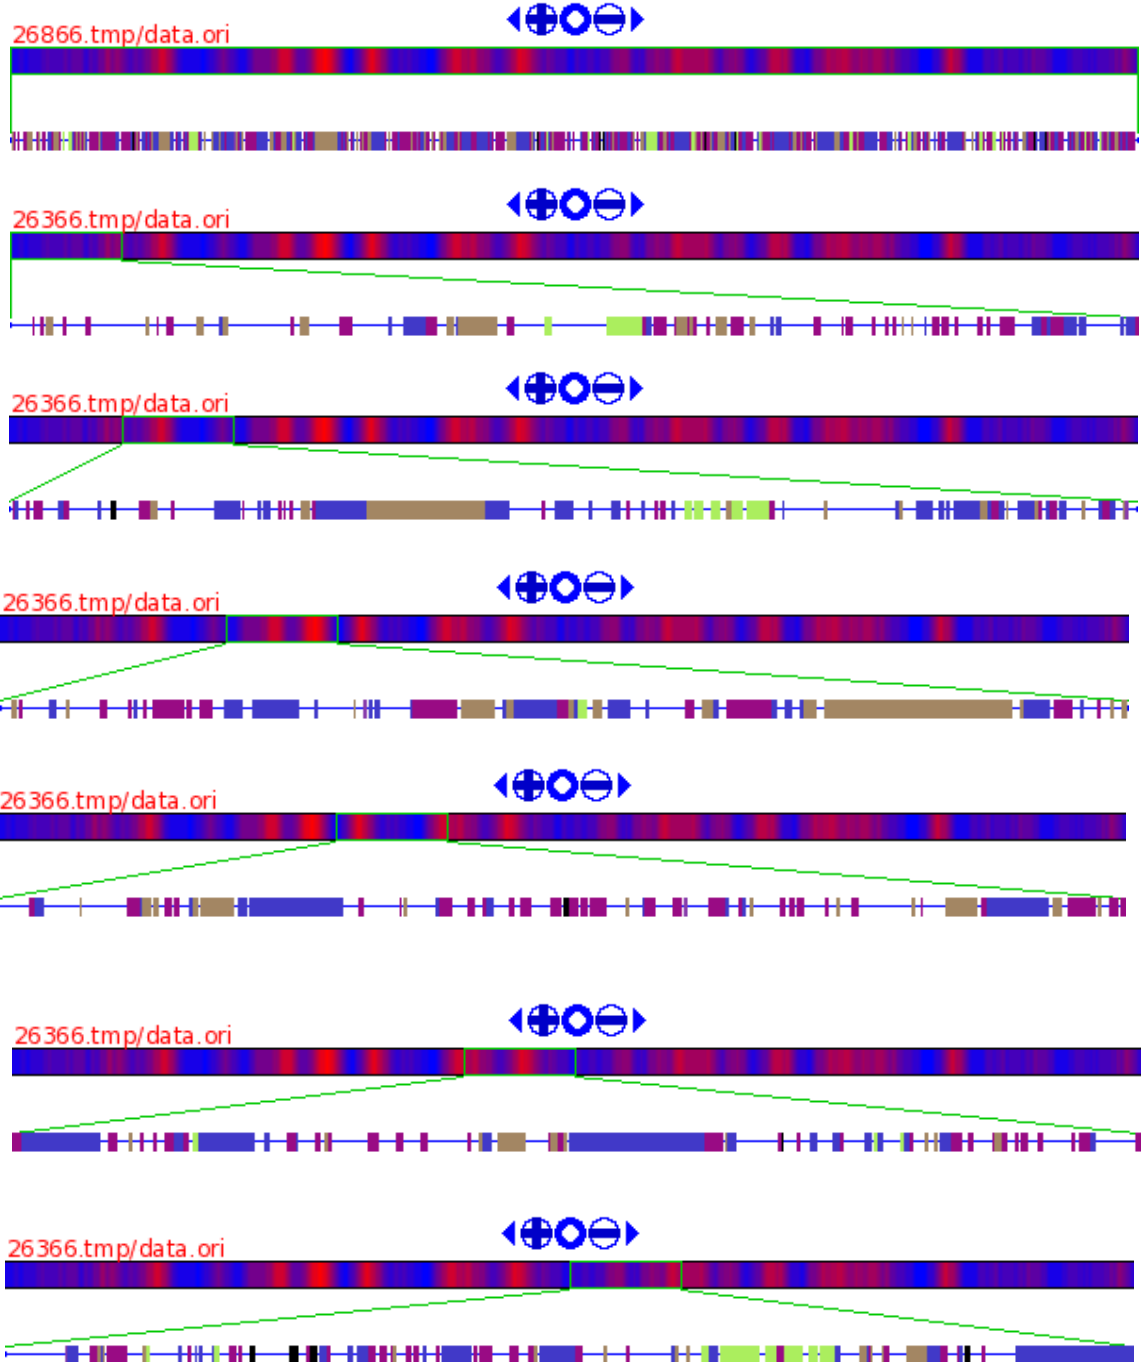

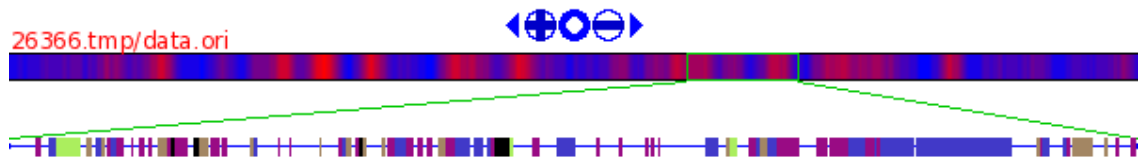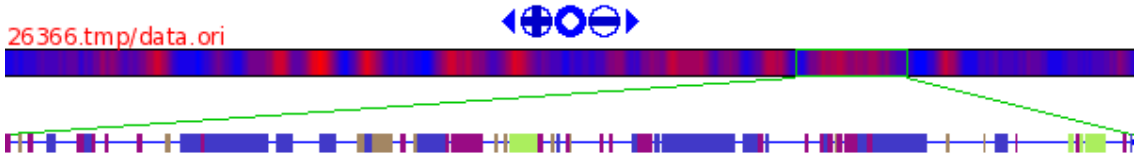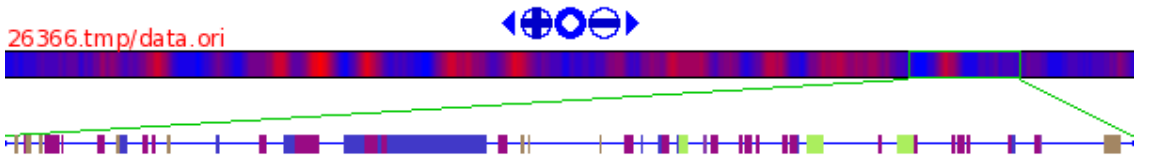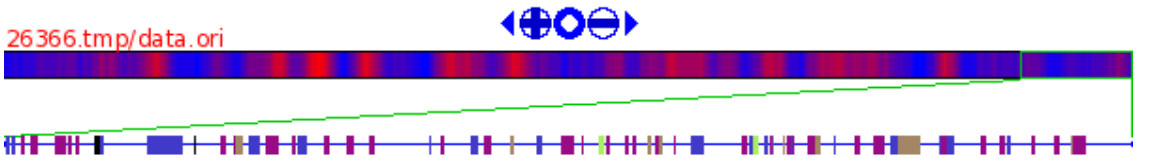

Number of Number of repetitive elements per kb (NoRE/kb): 1,95

Percentage of repetitive element nucleotides respect to intron nucleotides (REbp): 41,8%

### **Intron 2**

Length: 9859 Bp

Censor graphic output:

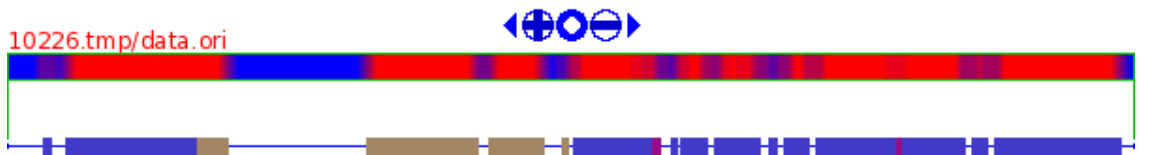

Number of Number of repetitive elements per kb (NoRE/kb): 2,55

Percentage of repetitive element nucleotides respect to intron nucleotides (REbp): 72,5%

### **Intron 3**

Length: 75 Bp

Number of Number of repetitive elements per kb (NoRE/kb): 0

Percentage of repetitive element nucleotides respect to intron nucleotides (REbp): 0

### **Intron 4**

Length: 8321 Bp

Censor graphic output:

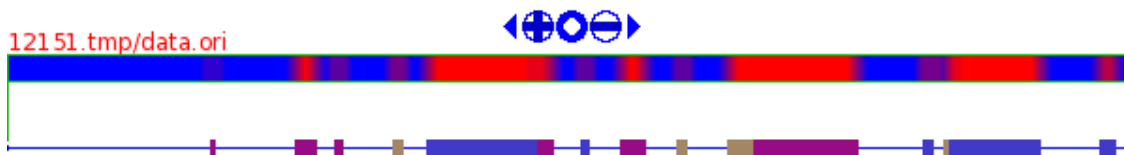

Number of Number of repetitive elements per kb (NoRE/kb): 1,92

Percentage of repetitive element nucleotides respect to intron nucleotides (REbp): 40,6%

### **Intron 5**

Length: 46633 Bp

Censor graphic output:

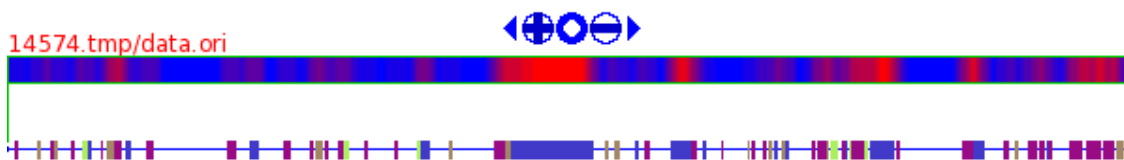

Number of Number of repetitive elements per kb (NoRE/kb): 1,89

Percentage of repetitive element nucleotides respect to intron nucleotides (REbp): 32,2%

## Intron 6

Length: 39889 Bp

Censor graphic output:

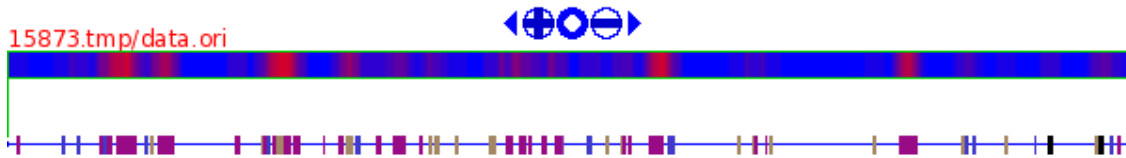

Number of Number of repetitive elements per kb (NoRE/kb): 1,92

Percentage of repetitive element nucleotides respect to intron nucleotides (REbp): 19,6%

### **Average values for *Aeafru* introns (excluding intron 3):**

Average *Aeafru* NoRE/kb:  $2,03 \pm 0,28$  and

Average *Aeafru* REbp:  $34,56 \% \pm 19,54$
