# Supplementary material for: The Orthologue of the Fruitfly Sex Behaviour Gene Fruitless in the Mosquito Aedes aegypti: Evolution of Genomic Organisation and Alternative Splicing
Source: PubMed Central journal article supplement (PMC3572092; doi:10.1371/journal.pone.0048554), 2013-02-13
Supplement: pone.0048554.s003.pdf [file pone.0048554.s003.pdf]

**Figure S3 – Exon/Intron junctions and MaxEntScan scores of *fru* genes**

**A**

| <i>Aeaf<sub>ru</sub></i> gene |                |                                                      |                  |                                  |               |
|-------------------------------|----------------|------------------------------------------------------|------------------|----------------------------------|---------------|
| Exon No.                      | Exon size (bp) | 5'ss                                                 | Intron size (bp) | 3'ss                             | N° of Y       |
| P1-m                          | 149            | R R<br>CCG <b>AAG</b> /gtatggtgagcggggt              | 425673           | N S<br>tcttttcttttttcag/GAACAG   | 12            |
| P1-f                          | 1299           | n.c.<br>CGG <b>CTG</b> /gtaagtacttttggtgg            | 424374           | N S<br>tcttttcttttttcag/GAACAG   | 12            |
| C1                            | 148            | V K<br>GTC <b>AAA</b> /gtaagtattctatggg              | 9859             | A H<br>tcttacttctccgtag/GCACAT   | 11            |
| C2                            | 201            | L K<br>TTG <b>AAA</b> /gtaagttcccgatggc              | 75               | V R<br>ctttcccttatttttag/GTACGA  | 11            |
| C3                            | 516            | S R<br>TCT <b>AGA</b> /gttta <del>g</del> atgcaaatct | 8321             | Q H<br>tttaggaagggttttcag/CAACAC | 4             |
| C4                            | 279            | L P<br>ITG <b>CCG</b> /gtaagtgatgagtttc              | 46633            | P I<br>tcttttttctcttcag/CCGATC   | 12            |
| C5                            | 130            | D G<br>TCG <b>ACG</b> /gtaagcgaacacgatac             | 39889            | F G<br>cctctgtttggttcag/GCCCG    | 9             |
| zC                            | 693            | Q M *<br>CAGATGTAAacottcagatcat                      |                  |                                  |               |
| Consensus                     |                | MAG/gtRagt                                           |                  | YYYYYYYYYYYYNYag/G               | 8,02 +/- 2,15 |

**B**

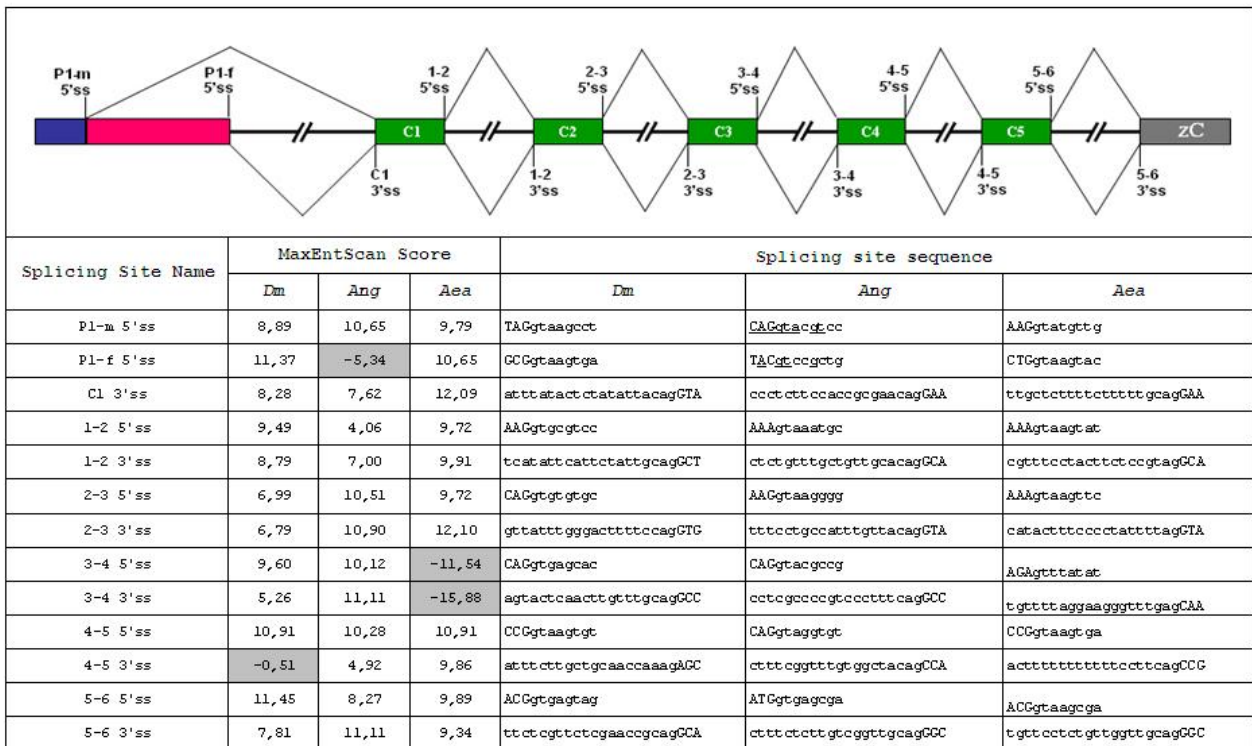

A) Coding sequences are shown in upper case letters and non-coding regions in lower case letters. The 5'ss consensus sequence is MAG/GTRAGT and the 3'ss consensus is Y<sub>n</sub>NYAG (Mount et al. 1992). The number of pyrimidines (N° of Y) in the 12 bp preceding the 3' ss (NYAG) is indicated for each 3'ss. The consensus number of pyrimidines for *Ae. aegypti* (8,02±2,15) is derived from the tabulation of 4688 *Ae. aegypti* splice-acceptor sites (Salvemini et al., 2011). M= A or C. R=A or G nucleotide. Y=T or C or nucleotide. N=any nucleotide. B) Schematic representation of *fru*-P1 gene. Shaded in grey negative MaxEntScan scores.
