# Supplementary material for: The Orthologue of the Fruitfly Sex Behaviour Gene Fruitless in the Mosquito Aedes aegypti: Evolution of Genomic Organisation and Alternative Splicing
Source: PubMed Central journal article supplement (PMC3572092; doi:10.1371/journal.pone.0048554), 2013-02-13
Supplement: pone.0048554.s004.pdf [file pone.0048554.s004.pdf]

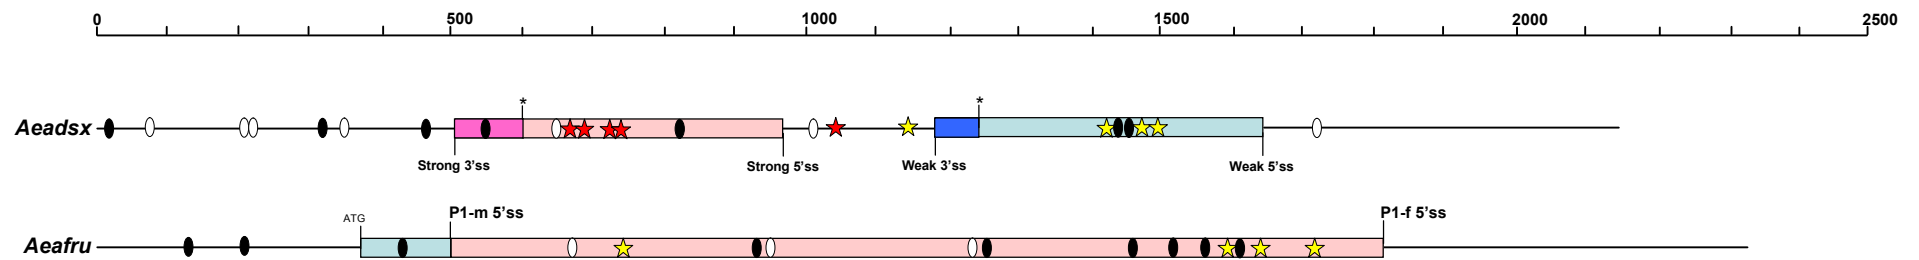

### *Aeadsx*

TRA-2-ISS 0  
 AEAD SX 77 CAAGA  
 AEAD SX 203 CAAGA  
 AEAD SX 212 CAAGA  
 AEAD SX 349 CAAGA  
 AEAD SX 650 CAAGA  
 AEAD SX 1013 CAAGA  
 AEAD SX 1719 CAAGG

RB P1 - TYPE B 0  
 AEAD SX 21 ATCCACA  
 AEAD SX 318 ATCTCTA  
 AEAD SX 464 ATCCGAA  
 AEAD SX 537 ATCTGAA  
 AEAD SX 819 ATCTAGA  
 AEAD SX 1435 ATCCGAA  
 AEAD SX 1459 ATCTTCA

TRA/TRA-2 b. s. ★  
 AEAD SX 1143 AATACAAACA  
 AEAD SX 1419 TCAACAAGCA  
 AEAD SX 1460 TCTTCAACCAACC  
 AEAD SX 1475 CCTACAATCTACA

Nv TRA/TRA-2 binding motif ★  
 Aeadsx 663 CGAAGATC  
 Aeadsx 684 GGAAGAAG  
 Aeadsx 705 AGAAGAAT  
 Aeadsx 718 CGAAGAAA  
 Aeadsx 1041 AGAAGAAT

### *Aefru*

TRA-2-ISS 0  
 Aefru 653 CAAGG  
 Aefru 985 CAAGG  
 Aefru 1228 CAAGA

RB P1 - Type B 0  
 Aefru 142 ATCTGAA  
 Aefru 227 ATCTAGA  
 Aefru 432 ATCCCCA  
 Aefru 954 ATCTTTA  
 Aefru 1243 ATCCGTA  
 Aefru 1468 ATCTAAA  
 Aefru 1525 ATCCGAA  
 Aefru 1568 ATCCGAA  
 Aefru 1609 ATCCGAA

TRA/TRA-2 b. s. ★  
 Aefru 731 ATAACAATCAAAA  
 Aefru 1591 TCATCAATCTACT  
 Aefru 1648 GCACCTGTCAACA  
 Aefru 1705 CCCTCAATCAGCA

**Figure S4** – Schematic representation of the position of the identified putative *cis*-elements involved in splicing regulation of *Aeadsx* and *Aefru*.
