# Supplementary material for: The Orthologue of the Fruitfly Sex Behaviour Gene Fruitless in the Mosquito Aedes aegypti: Evolution of Genomic Organisation and Alternative Splicing
Source: PubMed Central journal article supplement (PMC3572092; doi:10.1371/journal.pone.0048554), 2013-02-13
Supplement: pone.0048554.s005.pdf [file pone.0048554.s005.pdf]

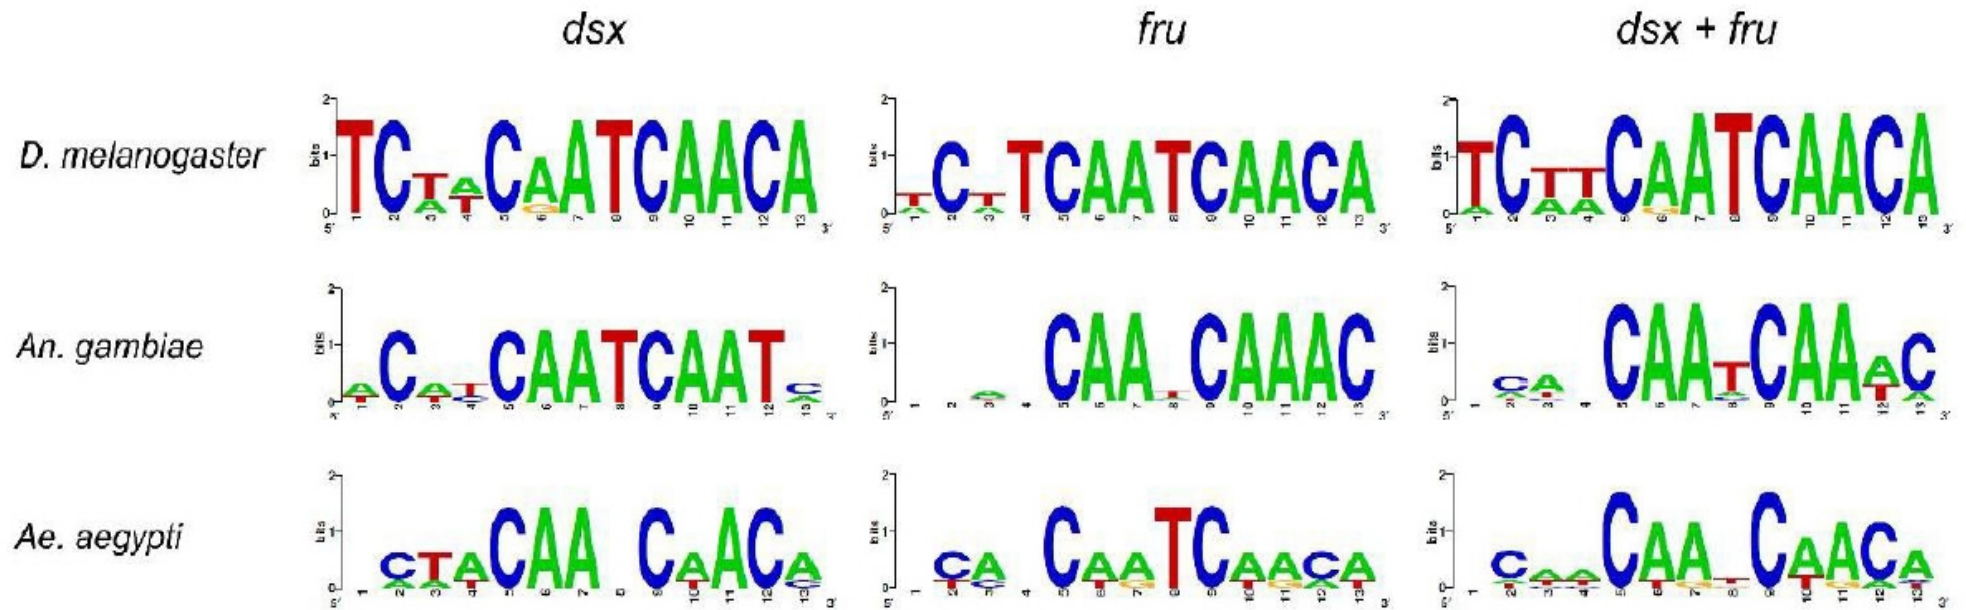

**Figure S5** - Consensus sequences of TRA/TRA-2 binding site of *D. melanogaster*, *An. Gambiae* and *Ae. aegypti* *dsx*, *fru*, and *dsx+fru* genes obtained with Weblogo web tool. The used sequences are reported below.

**Dmdsx**  
 >1  
 TCTTCAATCAACA  
 >2  
 TCTTCAATCAACA  
 >3  
 TCTACAATCAACA  
 >4  
 TCTTCAATCAACA  
 >5  
 TCAACAATCAACA  
 >6  
 TCAACGATCAACA

**Dmfru**  
 >1  
 ACTTCAATCAACA  
 >2  
 TCTTCAATCAACA  
 >3  
 TCATCAATCAACA

**Angdsx**  
 >1  
 TCTCCAATCAATC  
 >2  
 ACATCAATCAATC  
 >3  
 ACATCAATCAATA

**Angfru**  
 >1  
 TAAACAAACAAC  
 >2  
 GTATCAATCAAAC  
 >3  
 CCTTCAACCAAAC  
 >4  
 TAAACAATCAAAC  
 >5  
 CCCGCAATCAAAC

**Aeadsx**  
 >1  
 TCAACAAGCAACA  
 >2  
 TCTTCAACCAACC  
 >3  
 CCTACAATCTACA  
 >4  
 AATACAAACAACA

**Aeafu**  
 >1  
 ATAACAATCAAAA  
 >2  
 TCATCAATCTACT  
 >3  
 GCACCTGTCAACA  
 >4  
 CCCTCAATCAGCA
