# Supplementary material for: The Orthologue of the Fruitfly Sex Behaviour Gene Fruitless in the Mosquito Aedes aegypti: Evolution of Genomic Organisation and Alternative Splicing
Source: PubMed Central journal article supplement (PMC3572092; doi:10.1371/journal.pone.0048554), 2013-02-13
Supplement: pone.0048554.s006.pdf [file pone.0048554.s006.pdf]

**Figure S6 - Graphical representation and list of motifs identified by MEME analysis**

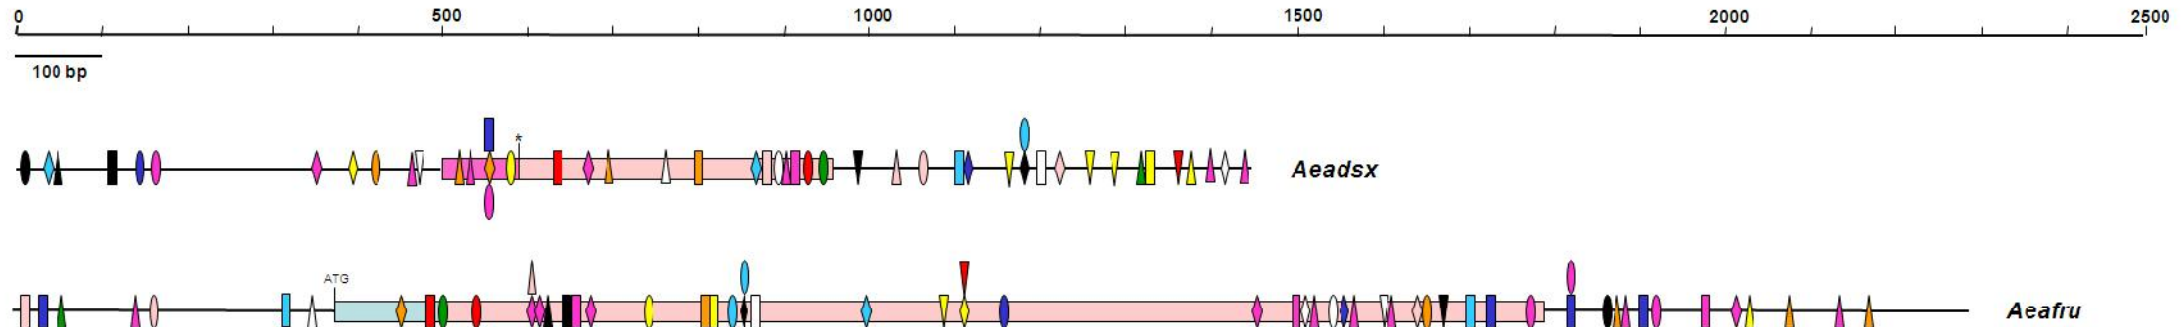

| ID       | Gene   | Start      | Sequence         | P-value  | ID       | Gene   | Start      | Sequence  | P-value  | ID       | Gene     | Start    | Sequence | P-value  |
|----------|--------|------------|------------------|----------|----------|--------|------------|-----------|----------|----------|----------|----------|----------|----------|
| Motif 1  | Aeadsx | 1428       | ABCATCCATCCGAAA  | 2.64e-09 | Motif 14 | Aeafru | 1977       | GGGAAACAG | 4.07e-06 | Motif 24 | Aeadsx   | 1126     | CGAAGCGG | 1.39e-05 |
|          | Aeafru | 1518       | AACAACCATCCGAAA  | 6.13e-09 |          | Aeadsx | 917        | GTGAAACAG | 9.39e-06 |          | Aeafru   | 604      | CGATCGCG | 5.97e-06 |
| Motif 2  | Aeadsx | 1183       | ACGATAAATAGCGACA | 4.07e-09 |          | Aeafru | 656        | GGGAAACAG | 2.17e-05 | Aeadsx   | 892      | GTTCGTCA | 9.54e-06 |          |
|          | Aeafru | 852        | ACGATAAATAGCGTCA | 7.10e-09 |          | Aeadsx | 1499       | GGGAAACCG | 1.43e-05 | Aeafru   | 1549     | GTTCGTCA | 9.54e-06 |          |
| Motif 3  | Aeadsx | 397        | CGTTTCGTGGAAC    | 2.20e-08 | Aeadsx   | 1107   | CTTCTCCTT  | 2.10e-06  | Motif 26 | Aeadsx   | 26       | CATGGTGT | 1.58e-05 |          |
|          | Aeafru | 1119       | TGTTTCGTGGAAC    | 8.32e-08 | Aeafru   | 322    | CCTCTCCTT  | 5.42e-06  | Aeafru   | 1865     | CATGGTGG | 6.85e-06 |          |          |
| Motif 4  | Aeadsx | 1125       | ACGAACGCGAC      | 1.90e-07 | Aeafru   | 1700   | CTTCTCCTT  | 7.13e-06  | Motif 27 | Aeadsx   | 932      | GCCACCGT | 1.94e-05 |          |
|          | Aeafru | 1557       | ACGAACGCGAC      | 3.92e-07 | Aeadsx   | 801    | GCAAAAGCAG | 4.34e-06  | Aeafru   | 546      | GCCACCGC | 8.42e-06 |          |          |
| Motif 5  | Aeafru | 616        | CGATCGTGC        | 3.91e-07 | Aeafru   | 815    | GAAAGCAG   | 1.14e-05  | Motif 28 | Aeadsx   | 578      | CGCCAGTC | 1.16e-05 |          |
|          | Aeadsx | 351        | AGATCGTGC        | 1.03e-06 | Aeafru   | 875    | CGTGGGTAT  | 1.75e-06  | Aeafru   | 747      | CGCCAGCC | 5.19e-06 |          |          |
|          | Aeafru | 604        | CGATCGGTC        | 3.20e-06 | Aeafru   | 14     | CGTTGGTAT  | 4.05e-06  | Motif 29 | Aeadsx   | 951      | ATGTTGAG | 1.45e-05 |          |
|          | Aeafru | 2021       | CGTTCGTGC        | 4.81e-06 | Aeafru   | 358    | GCAAGTCT   | 3.24e-06  | Aeafru   | 501      | ATGTTGAG | 1.45e-05 |          |          |
|          | Aeadsx | 671        | AGATCGATTC       | 9.52e-06 | Aeadsx   | 768    | GCAAGTCA   | 7.52e-06  | Motif 30 | Aeadsx   | 140      | TGTAGTGA | 1.45e-05 |          |
| Aeafru   | 1454   | TGATCGATTC | 1.52e-05         | Motif 19 | Aeadsx   | 46     | TGTGCATT   | 2.99e-06  | Aeafru   | 1159     | TGTAGTGA | 1.45e-05 |          |          |
| Motif 6  | Aeafru | 997        | TACAATTGTG       | 1.34e-06 | Aeafru   | 627    | TGTACATT   | 8.17e-06  | Aeadsx   | 164      | GACGGTTT | 8.95e-06 |          |          |
|          | Aeadsx | 40         | TAAAATTGTG       | 3.52e-06 | Aeadsx   | 1375   | TGTGTTCCA  | 2.44e-06  | Aeadsx   | 551      | GACGGTGT | 3.33e-05 |          |          |
|          | Aeadsx | 869        | TACAATCGTG       | 5.40e-06 | Aeafru   | 2032   | TGTCTCCA   | 5.05e-06  | Motif 31 | Aeafru   | 1771     | GCCGGTTT | 1.41e-05 |          |
| Motif 7  | Aeafru | 444        | ACGGTGTGGA       | 4.86e-07 | Aeafru   | 50     | GTGGTACTT  | 2.29e-06  | Aeafru   | 1825     | GACGGTTT | 8.95e-06 |          |          |
|          | Aeadsx | 552        | ACGGTGTAGA       | 2.53e-06 | Aeadsx   | 1335   | GTAGTACTT  | 6.25e-06  | Aeafru   | 1918     | GCCGGTGT | 4.97e-05 |          |          |
| Motif 8  | Aeadsx | 1228       | TCTACTTGTG       | 6.25e-07 | Aeadsx   | 464    | ATCCGAAA   | 2.89e-05  | Motif 32 | Aeadsx   | 1184     | CGATAATA | 3.55e-05 |          |
|          | Aeafru | 1639       | TCTACTAGTG       | 1.45e-06 | Aeadsx   | 537    | ATCTGAAC   | 1.10e-05  | Aeafru   | 840      | CGATAATA | 3.55e-05 |          |          |
| Motif 9  | Aeafru | 873        | GCACCAATTC       | 8.20e-06 | Aeafru   | 907    | ACCGGAAA   | 1.02e-04  | Aeafru   | 853      | CGATAATA | 3.55e-05 |          |          |
|          | Aeadsx | 1199       | GCAGCCATTC       | 1.05e-05 | Aeadsx   | 1390   | ACCGGAAA   | 1.02e-04  | Motif 33 | Aeadsx   | 426      | TGCACCTG | 2.04e-05 |          |
| Motif 10 | Aeadsx | 120        | GAGCCTGAAT       | 8.40e-07 | Aeadsx   | 1435   | ATCCGAAA   | 2.89e-05  | Aeafru   | 1647     | TGCACCTG | 7.79e-06 |          |          |
|          | Aeafru | 643        | GAGCTTGAAT       | 1.87e-06 | Aeafru   | 142    | ATCTGAAA   | 1.37e-04  | Motif 34 | Aeadsx   | 1060     | TGAAATGT | 4.43e-05 |          |
| Motif 11 | Aeafru | 489        | TCCGACCGAA       | 7.31e-07 | Aeafru   | 1525   | ATCCGAAA   | 2.89e-05  | Aeafru   | 166      | CGAAATGT | 1.92e-06 |          |          |
|          | Aeadsx | 639        | TCCGACCGAA       | 1.92e-06 | Aeafru   | 1568   | ATCCGAAA   | 2.89e-05  | Motif 35 | Aeadsx   | 478      | ACTGTTCT | 1.25e-05 |          |
| Motif 12 | Aeadsx | 1331       | AGCAGTAGTA       | 1.36e-06 | Aeafru   | 1609   | ATCCGAAA   | 2.89e-05  | Aeafru   | 1601     | ACTGTTCT | 1.25e-05 |          |          |
|          | Aeafru | 819        | AGCAGTACTA       | 2.81e-06 | Aeafru   | 1891   | ATCCGAAA   | 5.61e-05  | Motif 36 | Aeadsx   | 983      | CACGGGTG | 1.02e-05 |          |
| Motif 13 | Aeafru | 34         | CGCCGTGT         | 1.82e-06 | Aeafru   | 2130   | ATCCGAAA   | 5.61e-05  | Aeafru   | 1675     | CACGGGTG | 4.57e-06 |          |          |
|          | Aeafru | 1907       | CGCCACTGT        | 4.98e-06 | Aeadsx   | 527    | CGATTGCA   | 2.94e-05  | Motif 37 | Aeadsx   | 1357     | GTGTTTCG | 6.76e-06 |          |
|          | Aeadsx | 550        | CGACGGTGT        | 1.03e-05 | Aeadsx   | 696    | CGAATGCA   | 1.67e-05  | Aeafru   | 1118     | GTGTTTCG | 6.76e-06 |          |          |
|          | Aeafru | 1736       | GGCCACTGT        | 2.42e-05 | Aeafru   | 1882   | TGAATGCA   | 4.99e-05  | Aeadsx   | 1166     | AGTGCAA  | 2.71e-05 |          |          |
|          | Aeafru | 1824       | CGACGGTTT        | 2.81e-05 | Aeafru   | 2074   | CGATTGCA   | 2.94e-05  | Motif 38 | Aeadsx   | 1263     | AGTGCAA  | 2.71e-05 |          |
|          |        |            |                  |          | Aeafru   | 2167   | TGAATGCA   | 4.99e-05  | Aeadsx   | 1288     | AGTGCAA  | 2.71e-05 |          |          |
|          |        |            |                  |          |          |        |            |           |          | Aeafru   | 1089     | AGTGACA  | 4.39e-05 |          |
