# Supplementary material for: The Orthologue of the Fruitfly Sex Behaviour Gene Fruitless in the Mosquito Aedes aegypti: Evolution of Genomic Organisation and Alternative Splicing
Source: PubMed Central journal article supplement (PMC3572092; doi:10.1371/journal.pone.0048554), 2013-02-13
Supplement: pone.0048554.s007.pdf [file pone.0048554.s007.pdf]

## Methods S1

### Primers for *Aedes aegypti fru* cloning and developmental analyses

fru1: 5'-CGGCATTGAACGGCTATCC-3'  
fru1rev: 5'-CCTTCGGTGCATTGAAGC-3'  
fru1f: 5'-GCGTCATCGATCGTGTCTTG-3'  
fru2f: 5'-GTTTGCCAGCACTTCTCCC -3'  
fru2rev: 5'-GACAGTATCGCTTGATGTGC-3'  
fru1c: 5'-CAATACCGAGTGGTGTGTGG-3'  
fru3: 5'-GTTCTCTCTGCAGCTCTCG-3'  
fruL1: 5'-TACTGTTGCAAGTTCTCAATAG-3'  
fruL2: 5'-CAATACCGAGTGGTGTGTGG-3'  
Aearp49+: 5'-CCAAGATCGTCAAGAAGCGG-3'  
Aearp49-: 5'-GGTTGGTCACAGCGATGG-3'  
dsx3: 5'-GATACTGAAAGGCGCCGACG-3'  
dsx5: 5'-GCAGAATATGGGACTGGTGC-3'

### Primers for *Sabethes cyaneus fru* cloning

AeaWHH+: 5'-GCTGGAACAACCATCAG-3';  
AeaYQG-: 5'-GTTACCTCGCCCTGGTAC-3'  
SacBTB+: 5'-GCATCCCATCATCTACCTGC-3'  
AeaZNC-: 5'-TGACCTCCTTGCCGCACG-3'

### GenBank accession numbers of sequences used in phylogenetic and evolutionary analysis

*Drosophila melanogaster DmfruBTB*, [GenBank: NP\_524397]  
*D. sechellia DsfruBTB*, [GenBank: XP\_002038222]  
*D. erecta DefruBTB*, [GenBank: XP\_001979637]  
*D. ananassae DafruBTB*, [GenBank: XP\_001954108]  
*D. pseudobscura DpfruBTB*, [GenBank: XP\_001358536]  
*D. willistoni DwfruBTB*, [GenBank: XP\_002073544]  
*D. virilis DyfruBTB*, [GenBank: XP\_002056235]  
*D. grimshavi DgfruBTB*, [GenBank: XP\_001990228]  
*Ceratitis capitata CcfruBTB*, [GenBank: ACH81147]  
*Lutzomyia longipalpalis LlfruBTB*, [GenBank: AM090394]  
*Anopheles gambiae AngfruBTB*, [GenBank: AAV52865]  
*Culex quinquefasciatus CuqfruBTB*, [GenBank: XP\_001860373]  
*Danaus plexippus DapfruBTB*, [GenBank: EY257161]  
*Bombyx mori BmfruBTB*, [GenBank: AU000406]

*Tribolium castaneum* TcfruBTB, [GenBank: NP\_001157690]  
*Chorthippus brunneus* CbfruBTB, [GenBank: ABD85043.1]  
*Schistocerca gregaria* SgfruBTB, [GenBank: ADM86718.1]  
*Blattella germanica* BgfruBTB, [GenBank: CAZ68905.1]  
*Nasonia vitripennis* NvfruBTB, [GenBank: NP\_001157595]  
*Apis mellifera* AmfruBTB, [GenBank: XP\_392552]  
*Harpegnathos saltator* HasfruBTB, [GenBank: EFN81805]  
*D. melanogaster* DmTRA-2 [GenBank: NM\_057416.2]  
*C. capitata* CcfruBTB CcTRA-2 [GenBank: EU999754.1]  
*Anastrepha obliqua* AoTRA-2 [GenBank: FN658607.1]  
*Lucilia cuprina* LcTRA-2 [GenBank: FJ461620.1]  
*Glossina morsitans* GmTRA-2 [GenBank: DV608906.1]  
*Musca domestica* MdTRA-2 [GenBank: AY847518.1]  
*Ae. aegypti* AeaTRA-2\_A [GenBank: AAEL009224]  
*Ae. aegypti* AeaTRA-2\_B [GenBank: AAEL006416]  
*Ae. aegypti* AeaTRA-2\_C [GenBank: AAEL009222]  
*Ae. aegypti* AeaTRA-2\_D [GenBank: AAEL004293]  
*An. gambiae* AngTRA-2\_A [GenBank: AGAP006798]  
*An. gambiae* AngTRA-2\_B [GenBank: BM620287.1]  
*A. mellifera* AmTRA-2 [GenBank: XP\_001121070.2]  
*Daphnia pulex* DpTRA-2 [GenBank: EFX90042.1]  
*Homo sapiens* HsTRA\_2 $\alpha$  [GenBank: NP\_037425]

## Databases and web tools

-RegRNA

(<http://regrna.mbc.nctu.edu.tw/index.php>)

-TRANSFAC

(<http://www.gene-regulation.com/pub/databases/transfac/doc/toc.html>)

-PROMO (Messegueur et al. 2002, Farrè et al. 2003)

(<http://algggen.lsi.upc.es/>)

-CENSOR (Jurka et al. 1996)

(<http://www.girinst.org/censor/index.php>)

-BLASTX, BLASTN, TBLASTN and TBLASTX

(<http://blast.ncbi.nlm.nih.gov/>)

-Promoter 2.0 (Knudsen, 1999)

([www.cbc.dtu.dk/services/Promoter](http://www.cbc.dtu.dk/services/Promoter))

-BDGP Neural Network Promoter Prediction (Reese, 2001)

([www.fruitfly.org:9005/seq\\_tools/promoter](http://www.fruitfly.org:9005/seq_tools/promoter))

-GPMiner (Lee et al., 2012)

(<http://gpminer.mbc.nctu.edu.tw/index.php>).

-Footprinter 3.0 (Blanchette and Tompa 2003; Fang and Blanchette 2006)

(<http://wingless.cs.washington.edu/htbin-post/unrestricted/FootPrinterWeb/FootPrinterInput2.pl>)

-MaxEntScore algorithms

([http://genes.mit.edu/burgelab/maxent/Xmaxentscan\\_scoreseq.html](http://genes.mit.edu/burgelab/maxent/Xmaxentscan_scoreseq.html))
