# Supplementary material for: The Orthologue of the Fruitfly Sex Behaviour Gene Fruitless in the Mosquito Aedes aegypti: Evolution of Genomic Organisation and Alternative Splicing
Source: PubMed Central journal article supplement (PMC3572092; doi:10.1371/journal.pone.0048554), 2013-02-13
Supplement: pone.0048554.s008.pdf [file pone.0048554.s008.pdf]

**Table S1 - Modified Censor output of repetitive elements identified in *Aeafru* intronic regions**

| <b>Aeafru Intron</b> | <b>Name</b>                    | <b>Class</b>   | <b>From</b> | <b>To</b> | <b>Score</b> |
|----------------------|--------------------------------|----------------|-------------|-----------|--------------|
| 1                    | <a href="#">AeBuster3</a>      | DNA/hAT        | 375736      | 375807    | 293          |
| 2                    | <a href="#">AeHerves2</a>      | DNA/hAT        | 7775        | 7827      | 253          |
| 1                    | <a href="#">Ag-Outcast-6</a>   | NonLTR/Outcast | 227962      | 227997    | 206          |
| 1                    | <a href="#">AMPLICON_AA</a>    | NonLTR/RTE     | 415303      | 415359    | 249          |
| 5                    | <a href="#">AMPLICON_AA</a>    | NonLTR/RTE     | 17149       | 17469     | 1135         |
| 1                    | <a href="#">ATCOPIA30_I</a>    | LTR/Copia      | 339909      | 340002    | 221          |
| 1                    | <a href="#">ATENSPM5</a>       | DNA/EnSpm      | 372385      | 372427    | 225          |
| 1                    | <a href="#">ATLINE1_6</a>      | NonLTR/L1      | 410542      | 410622    | 250          |
| 1                    | <a href="#">ATREP20</a>        | DNA/Helitron   | 409738      | 409816    | 211          |
| 2                    | <a href="#">BEL-10_AA-I</a>    | LTR/BEL        | 3153        | 3985      | 1083         |
| 2                    | <a href="#">BEL-10_AA-I</a>    | LTR/BEL        | 3986        | 4120      | 384          |
| 2                    | <a href="#">BEL-10_AA-I</a>    | LTR/BEL        | 4211        | 4430      | 933          |
| 2                    | <a href="#">BEL-10_AA-I</a>    | LTR/BEL        | 4858        | 4912      | 219          |
| 1                    | <a href="#">BEL-10_AA-LTR</a>  | LTR/BEL        | 5113        | 5191      | 269          |
| 2                    | <a href="#">BEL-10_AA-LTR</a>  | LTR/BEL        | 1672        | 1935      | 862          |
| 2                    | <a href="#">BEL-10_AA-LTR</a>  | LTR/BEL        | 4431        | 4694      | 862          |
| 1                    | <a href="#">BEL-172_AA-I</a>   | LTR/BEL        | 263741      | 263776    | 236          |
| 1                    | <a href="#">BEL-176_AA-I</a>   | LTR/BEL        | 246110      | 246277    | 676          |
| 1                    | <a href="#">BEL-182_AA-I</a>   | LTR/BEL        | 135210      | 135387    | 611          |
| 1                    | <a href="#">BEL-208_AA-I</a>   | LTR/BEL        | 187342      | 187420    | 252          |
| 1                    | <a href="#">BEL-212_AA-I</a>   | LTR/BEL        | 215733      | 215762    | 270          |
| 1                    | <a href="#">BEL-212_AA-I</a>   | LTR/BEL        | 215920      | 215949    | 246          |
| 1                    | <a href="#">BEL-22_AA-I</a>    | LTR/BEL        | 135484      | 135958    | 951          |
| 1                    | <a href="#">BEL-221_AA-I</a>   | LTR/BEL        | 115989      | 122455    | 57971        |
| 1                    | <a href="#">BEL-221_AA-LTR</a> | LTR/BEL        | 115137      | 115404    | 2449         |
| 1                    | <a href="#">BEL-221_AA-LTR</a> | LTR/BEL        | 115405      | 115495    | 788          |
| 1                    | <a href="#">BEL-221_AA-LTR</a> | LTR/BEL        | 115496      | 115556    | 551          |
| 1                    | <a href="#">BEL-221_AA-LTR</a> | LTR/BEL        | 115912      | 115988    | 703          |
| 1                    | <a href="#">BEL-221_AA-LTR</a> | LTR/BEL        | 122456      | 122723    | 2449         |
| 1                    | <a href="#">BEL-221_AA-LTR</a> | LTR/BEL        | 122724      | 122814    | 788          |
| 1                    | <a href="#">BEL-221_AA-LTR</a> | LTR/BEL        | 122815      | 122875    | 551          |
| 1                    | <a href="#">BEL-221_AA-LTR</a> | LTR/BEL        | 123231      | 123307    | 703          |
| 1                    | <a href="#">BEL-228_AA-I</a>   | LTR/BEL        | 53425       | 53712     | 1196         |
| 1                    | <a href="#">BEL-228_AA-I</a>   | LTR/BEL        | 132823      | 133089    | 1161         |
| 1                    | <a href="#">BEL-233_AA-I</a>   | LTR/BEL        | 134997      | 135187    | 538          |
| 1                    | <a href="#">BEL-243_AA-I</a>   | LTR/BEL        | 246278      | 246800    | 986          |
| 1                    | <a href="#">BEL-26_CQ-I</a>    | LTR/BEL        | 328298      | 328356    | 229          |
| 6                    | <a href="#">BEL-31_CQ-LTR</a>  | LTR/BEL        | 35287       | 35335     | 248          |
| 1                    | <a href="#">BEL-32_AA-I</a>    | LTR/BEL        | 237412      | 237514    | 307          |
| 6                    | <a href="#">BEL-32_AA-I</a>    | LTR/BEL        | 17145       | 17191     | 254          |
| 1                    | <a href="#">BEL-38-I_DR</a>    | LTR/BEL        | 234740      | 234807    | 220          |
| 1                    | <a href="#">BEL-48_AA-I</a>    | LTR/BEL        | 7021        | 7224      | 699          |
| 1                    | <a href="#">BEL-48_AA-I</a>    | LTR/BEL        | 8045        | 8160      | 537          |
| 1                    | <a href="#">BEL-48_AA-I</a>    | LTR/BEL        | 26533       | 26942     | 1265         |
| 5                    | <a href="#">BEL-52_AA-I</a>    | LTR/BEL        | 1313        | 1399      | 237          |
| 1                    | <a href="#">BEL-54_AA-I</a>    | LTR/BEL        | 102251      | 103474    | 7552         |
| 1                    | <a href="#">BEL-58_AA-I</a>    | LTR/BEL        | 98984       | 99023     | 221          |
| 1                    | <a href="#">BEL-58_AA-I</a>    | LTR/BEL        | 257550      | 257620    | 289          |
| 4                    | <a href="#">BEL-608_AA-I</a>   | LTR/BEL        | 5323        | 5510      | 1520         |
| 4                    | <a href="#">BEL-608_AA-I</a>   | LTR/BEL        | 6914        | 6961      | 416          |
| 1                    | <a href="#">BEL-613_AA-I</a>   | LTR/BEL        | 134744      | 134848    | 292          |
| 1                    | <a href="#">BEL-621_AA-I</a>   | LTR/BEL        | 136016      | 136194    | 483          |
| 1                    | <a href="#">BEL-69_AA-I</a>    | LTR/BEL        | 294632      | 295324    | 4776         |
| 1                    | <a href="#">BEL-69_AA-I</a>    | LTR/BEL        | 295325      | 295358    | 249          |
| 1                    | <a href="#">BEL-6-I_XT</a>     | LTR/BEL        | 155645      | 155694    | 235          |
| 1                    | <a href="#">BEL-7_AA-I</a>     | LTR/BEL        | 190011      | 190333    | 1938         |
| 1                    | <a href="#">BEL-7_AA-I</a>     | LTR/BEL        | 190499      | 190573    | 495          |

|   |                                  |                     |        |        |       |
|---|----------------------------------|---------------------|--------|--------|-------|
| 1 | <a href="#">BEL-81 AA-LTR</a>    | LTR/BEL             | 151010 | 151077 | 390   |
| 1 | <a href="#">BEL-8-I NV</a>       | LTR/BEL             | 237871 | 237929 | 222   |
| 1 | <a href="#">BEL-91 AA-I</a>      | LTR/BEL             | 85367  | 85472  | 430   |
| 1 | <a href="#">BEL-91 AA-I</a>      | LTR/BEL             | 232090 | 232201 | 619   |
| 1 | <a href="#">BEL-91 AA-I</a>      | LTR/BEL             | 406611 | 406666 | 211   |
| 5 | <a href="#">BRODYAGA2</a>        | DNA                 | 350    | 439    | 204   |
| 1 | <a href="#">CER15-1-I CE</a>     | LTR                 | 163034 | 163634 | 600   |
| 1 | <a href="#">CER15-1-I CE</a>     | LTR                 | 163682 | 164118 | 325   |
| 5 | <a href="#">Chapaev-1 CE</a>     | DNA/Chapaev         | 2651   | 2779   | 252   |
| 4 | <a href="#">Chapaev-16 HM</a>    | DNA/Chapaev         | 2422   | 2479   | 234   |
| 1 | <a href="#">Chapaev3-1 AA</a>    | DNA/Chapaev         | 154374 | 154686 | 784   |
| 1 | <a href="#">Chapaev3-1N1 AAe</a> | DNA/Chapaev         | 313890 | 315022 | 10407 |
| 1 | <a href="#">Chapaev-9 HM</a>     | DNA/Chapaev         | 175805 | 175865 | 220   |
| 1 | <a href="#">Chapaev-N1 AAe</a>   | DNA/Chapaev         | 270048 | 270169 | 237   |
| 1 | <a href="#">Chapaev-N1 AAe</a>   | DNA/Chapaev         | 383939 | 384070 | 800   |
| 1 | <a href="#">Chapaev-N2 AAe</a>   | DNA/Chapaev         | 156815 | 156918 | 778   |
| 1 | <a href="#">Chapaev-N3 AAe</a>   | DNA/Chapaev         | 268915 | 268969 | 256   |
| 1 | <a href="#">Chapaev-N4 AAe</a>   | DNA/Chapaev         | 149775 | 150041 | 1986  |
| 1 | <a href="#">Chapaev-N4 AAe</a>   | DNA/Chapaev         | 220641 | 220853 | 900   |
| 1 | <a href="#">Chapaev-N5 AAe</a>   | DNA/Chapaev         | 91390  | 91553  | 364   |
| 1 | <a href="#">Chapaev-N5 AAe</a>   | DNA/Chapaev         | 91557  | 91652  | 261   |
| 1 | <a href="#">Chapaev-N5 AAe</a>   | DNA/Chapaev         | 248060 | 248101 | 225   |
| 1 | <a href="#">Chapaev-N5 AAe</a>   | DNA/Chapaev         | 378224 | 378402 | 447   |
| 6 | <a href="#">Chapaev-N6 AAe</a>   | DNA/Chapaev         | 3901   | 4289   | 1893  |
| 1 | <a href="#">Chapaev-N7 AAe</a>   | DNA/Chapaev         | 189973 | 190010 | 266   |
| 6 | <a href="#">Chapaev-N7 AAe</a>   | DNA/Chapaev         | 5334   | 5566   | 1505  |
| 1 | <a href="#">Ci000012</a>         | Interspersed Repeat | 198697 | 198752 | 205   |
| 5 | <a href="#">COP8 I MT</a>        | LTR/Copia           | 33894  | 33925  | 204   |
| 1 | <a href="#">Copia-1 DPer-I</a>   | LTR/Copia           | 293306 | 293385 | 214   |
| 1 | <a href="#">Copia-101 AA-I</a>   | LTR/Copia           | 16412  | 16624  | 392   |
| 1 | <a href="#">Copia-107 AA-I</a>   | LTR/Copia           | 1368   | 1589   | 289   |
| 1 | <a href="#">Copia-107 AA-I</a>   | LTR/Copia           | 81033  | 81154  | 771   |
| 1 | <a href="#">Copia-107 AA-I</a>   | LTR/Copia           | 168708 | 168814 | 337   |
| 5 | <a href="#">Copia-107 AA-I</a>   | LTR/Copia           | 4187   | 4249   | 438   |
| 5 | <a href="#">Copia-107 AA-I</a>   | LTR/Copia           | 4250   | 4455   | 1081  |
| 6 | <a href="#">Copia-107 AA-I</a>   | LTR/Copia           | 11983  | 12224  | 1232  |
| 1 | <a href="#">Copia-115 AA-LTR</a> | LTR/Copia           | 69446  | 69620  | 1283  |
| 1 | <a href="#">Copia11-NVi I</a>    | LTR/Copia           | 270970 | 271029 | 227   |
| 1 | <a href="#">Copia-12 BD-I</a>    | LTR/Copia           | 270829 | 270888 | 245   |
| 1 | <a href="#">Copia-125 AA-I</a>   | LTR/Copia           | 17748  | 18128  | 647   |
| 1 | <a href="#">Copia-125 AA-I</a>   | LTR/Copia           | 310344 | 310443 | 749   |
| 1 | <a href="#">Copia-125 AA-I</a>   | LTR/Copia           | 310444 | 310631 | 1319  |
| 1 | <a href="#">Copia-125 AA-I</a>   | LTR/Copia           | 310926 | 311554 | 4738  |
| 1 | <a href="#">Copia-130 AA-I</a>   | LTR/Copia           | 295861 | 295889 | 220   |
| 1 | <a href="#">Copia-130 AA-I</a>   | LTR/Copia           | 311555 | 311607 | 226   |
| 1 | <a href="#">Copia-133 AA-I</a>   | LTR/Copia           | 16997  | 17284  | 780   |
| 1 | <a href="#">Copia-133 AA-I</a>   | LTR/Copia           | 17352  | 17728  | 1021  |
| 1 | <a href="#">Copia-133 AA-I</a>   | LTR/Copia           | 18135  | 18311  | 297   |
| 1 | <a href="#">Copia-138 AA-I</a>   | LTR/Copia           | 267330 | 267484 | 455   |
| 1 | <a href="#">Copia-14 AA-I</a>    | LTR/Copia           | 266315 | 266361 | 245   |
| 6 | <a href="#">Copia-14 MLP-I</a>   | LTR/Copia           | 17195  | 17258  | 262   |
| 1 | <a href="#">Copia-16 CQ-I</a>    | LTR/Copia           | 303119 | 303249 | 265   |
| 6 | <a href="#">Copia-23 MLP-I</a>   | LTR/Copia           | 5110   | 5167   | 234   |
| 6 | <a href="#">Copia-26 AA-I</a>    | LTR/Copia           | 9573   | 9794   | 1764  |
| 5 | <a href="#">Copia-27 MLP-I</a>   | LTR/Copia           | 45932  | 46115  | 336   |
| 5 | <a href="#">Copia27-VV LTR</a>   | LTR/Copia           | 2006   | 2063   | 240   |
| 1 | <a href="#">Copia-29 DPu-I</a>   | LTR/Copia           | 126669 | 126737 | 223   |
| 6 | <a href="#">Copia-29-I VV</a>    | LTR/Copia           | 17037  | 17076  | 217   |
| 1 | <a href="#">Copia-33 SB-I</a>    | LTR/Copia           | 358935 | 358986 | 201   |
| 1 | <a href="#">Copia-34 SB-I</a>    | LTR/Copia           | 401021 | 401062 | 219   |
| 1 | <a href="#">Copia3-I CR</a>      | LTR/Copia           | 359203 | 359247 | 218   |
| 6 | <a href="#">Copia3-I DR</a>      | LTR/Copia           | 33744  | 33780  | 235   |
| 1 | <a href="#">Copia-4 AT-I</a>     | LTR/Copia           | 204440 | 204499 | 253   |

|   |                                 |               |        |        |       |
|---|---------------------------------|---------------|--------|--------|-------|
| 1 | <a href="#">Copia-41 PIT-I</a>  | LTR/Copia     | 196605 | 196636 | 220   |
| 1 | <a href="#">Copia-43 SB-I</a>   | LTR/Copia     | 317651 | 317685 | 219   |
| 1 | <a href="#">Copia-7 MLP-I</a>   | LTR/Copia     | 127103 | 127180 | 243   |
| 1 | <a href="#">Copia-9 AA-I</a>    | LTR/Copia     | 56086  | 57280  | 3241  |
| 1 | <a href="#">Copia-96 AA-I</a>   | LTR/Copia     | 16836  | 16945  | 370   |
| 1 | <a href="#">Copia-97 AA-I</a>   | LTR/Copia     | 57281  | 60148  | 25323 |
| 1 | <a href="#">Copia-97 AA-LTR</a> | LTR/Copia     | 55881  | 56085  | 1745  |
| 1 | <a href="#">Copia-97 AA-LTR</a> | LTR/Copia     | 60149  | 60368  | 1865  |
| 1 | <a href="#">CR1 Ele10</a>       | NonLTR/CR1    | 369325 | 369363 | 217   |
| 1 | <a href="#">CR1 Ele36</a>       | NonLTR/CR1    | 293534 | 293735 | 454   |
| 1 | <a href="#">CR1 Ele42</a>       | NonLTR/CR1    | 28821  | 28931  | 399   |
| 1 | <a href="#">CR1 Ele42</a>       | NonLTR/CR1    | 202366 | 202477 | 354   |
| 1 | <a href="#">CR1 Ele42</a>       | NonLTR/CR1    | 364773 | 364856 | 329   |
| 5 | <a href="#">CR1 Ele42</a>       | NonLTR/CR1    | 3394   | 3486   | 299   |
| 1 | <a href="#">CR1-10 HM</a>       | NonLTR/CR1    | 75765  | 75830  | 207   |
| 1 | <a href="#">CR1-101 AAe</a>     | NonLTR/CR1    | 175890 | 176201 | 2446  |
| 1 | <a href="#">CR1-101 AAe</a>     | NonLTR/CR1    | 176774 | 178825 | 17778 |
| 1 | <a href="#">CR1-101 AAe</a>     | NonLTR/CR1    | 347492 | 347535 | 215   |
| 6 | <a href="#">CR1-11 HM</a>       | NonLTR/CR1    | 2463   | 2593   | 252   |
| 1 | <a href="#">CR1-110 AAe</a>     | NonLTR/CR1    | 349991 | 350436 | 2864  |
| 6 | <a href="#">CR1-18 HM</a>       | NonLTR/CR1    | 12341  | 12452  | 215   |
| 6 | <a href="#">CR1-21 HM</a>       | NonLTR/CR1    | 3422   | 3534   | 233   |
| 6 | <a href="#">CR1-23 SP</a>       | NonLTR/CR1    | 20512  | 20617  | 224   |
| 1 | <a href="#">CR1-4 HM</a>        | NonLTR/CR1    | 385617 | 385682 | 249   |
| 6 | <a href="#">CR1-4 HM</a>        | NonLTR/CR1    | 4886   | 4951   | 228   |
| 6 | <a href="#">CR1-48 HM</a>       | NonLTR/CR1    | 33877  | 33947  | 213   |
| 1 | <a href="#">CR1-52 AAe</a>      | NonLTR/CR1    | 98747  | 98876  | 334   |
| 4 | <a href="#">CR1-52 HM</a>       | NonLTR/CR1    | 6757   | 6837   | 232   |
| 5 | <a href="#">CR1-60 HM</a>       | NonLTR/CR1    | 43017  | 43075  | 230   |
| 1 | <a href="#">CR1-61 HM</a>       | NonLTR/CR1    | 377416 | 377471 | 226   |
| 1 | <a href="#">CR1-86 AAe</a>      | NonLTR/CR1    | 214597 | 214939 | 3015  |
| 1 | <a href="#">CR1-98 AAe</a>      | NonLTR/CR1    | 89929  | 89995  | 266   |
| 1 | <a href="#">CR1-98 AAe</a>      | NonLTR/CR1    | 282735 | 282877 | 1271  |
| 1 | <a href="#">CR1-98 AAe</a>      | NonLTR/CR1    | 325324 | 325393 | 308   |
| 1 | <a href="#">CR1-98 AAe</a>      | NonLTR/CR1    | 415417 | 415543 | 291   |
| 1 | <a href="#">Crack-4 AAe</a>     | NonLTR/Crack  | 411519 | 411578 | 231   |
| 1 | <a href="#">Crack-7 BF</a>      | NonLTR/Crack  | 257958 | 258081 | 277   |
| 1 | <a href="#">Daphne-1 NV</a>     | NonLTR/Daphne | 413152 | 413188 | 223   |
| 1 | <a href="#">DIRS-1 DPu</a>      | LTR/DIRS      | 87416  | 87479  | 220   |
| 6 | <a href="#">DIRS-18 XT</a>      | LTR/DIRS      | 26328  | 26405  | 255   |
| 1 | <a href="#">DNA-1 AAe</a>       | DNA           | 30260  | 30455  | 587   |
| 1 | <a href="#">DNA-1 AAe</a>       | DNA           | 287304 | 287373 | 325   |
| 1 | <a href="#">DNA-1 AAe</a>       | DNA           | 343048 | 343216 | 323   |
| 6 | <a href="#">DNA-1 AAe</a>       | DNA           | 22868  | 22988  | 408   |
| 6 | <a href="#">DNA-1 AAe</a>       | DNA           | 22989  | 23134  | 742   |
| 1 | <a href="#">DNA-1 CQ</a>        | DNA           | 296851 | 296950 | 231   |
| 1 | <a href="#">DNA-10 AAe</a>      | DNA           | 258683 | 258887 | 1174  |
| 1 | <a href="#">DNA-11 AAe</a>      | DNA           | 341080 | 341566 | 3432  |
| 1 | <a href="#">DNA-12 AAe</a>      | DNA           | 151694 | 151916 | 1914  |
| 1 | <a href="#">DNA-12 AAe</a>      | DNA           | 205065 | 205317 | 1875  |
| 1 | <a href="#">DNA-12 AAe</a>      | DNA           | 362860 | 363078 | 1022  |
| 1 | <a href="#">DNA-12 AAe</a>      | DNA           | 394849 | 395105 | 1357  |
| 1 | <a href="#">DNA-13 AAe</a>      | DNA           | 133645 | 133847 | 329   |
| 1 | <a href="#">DNA-13 AAe</a>      | DNA           | 155202 | 155323 | 522   |
| 4 | <a href="#">DNA-13 AAe</a>      | DNA           | 5518   | 6273   | 4201  |
| 1 | <a href="#">DNA-14 AAe</a>      | DNA           | 225915 | 226106 | 615   |
| 1 | <a href="#">DNA-14 AAe</a>      | DNA           | 226335 | 226420 | 240   |
| 1 | <a href="#">DNA-2 AAe</a>       | DNA           | 38817  | 38996  | 363   |
| 1 | <a href="#">DNA-2 AAe</a>       | DNA           | 79377  | 79685  | 2401  |
| 1 | <a href="#">DNA-2 AAe</a>       | DNA           | 83597  | 83865  | 1875  |
| 1 | <a href="#">DNA-2 AAe</a>       | DNA           | 151920 | 152022 | 630   |
| 1 | <a href="#">DNA-2 AAe</a>       | DNA           | 157401 | 157586 | 1081  |
| 1 | <a href="#">DNA-2 AAe</a>       | DNA           | 158465 | 158536 | 379   |

|   |                              |     |        |        |      |
|---|------------------------------|-----|--------|--------|------|
| 1 | <a href="#">DNA-2 AAe</a>    | DNA | 231873 | 231980 | 258  |
| 1 | <a href="#">DNA-2 AAe</a>    | DNA | 232023 | 232087 | 237  |
| 1 | <a href="#">DNA-2 AAe</a>    | DNA | 366056 | 366307 | 1170 |
| 4 | <a href="#">DNA-2 AAe</a>    | DNA | 2130   | 2278   | 511  |
| 6 | <a href="#">DNA-2 AAe</a>    | DNA | 19365  | 19612  | 691  |
| 1 | <a href="#">DNA-2 CQ</a>     | DNA | 145053 | 145263 | 386  |
| 1 | <a href="#">DNA-2 CQ</a>     | DNA | 147050 | 147398 | 562  |
| 1 | <a href="#">DNA-2-1 HM</a>   | DNA | 34874  | 34918  | 207  |
| 6 | <a href="#">DNA-2-24B DR</a> | DNA | 385    | 464    | 238  |
| 1 | <a href="#">DNA-2-3 HM</a>   | DNA | 392818 | 392897 | 203  |
| 1 | <a href="#">DNA3-1 AAe</a>   | DNA | 205723 | 205759 | 265  |
| 1 | <a href="#">DNA3-1 AAe</a>   | DNA | 216044 | 216127 | 482  |
| 1 | <a href="#">DNA3-1 AAe</a>   | DNA | 220975 | 221102 | 915  |
| 1 | <a href="#">DNA3-1 AAe</a>   | DNA | 261110 | 261301 | 1112 |
| 1 | <a href="#">DNA3-1 AAe</a>   | DNA | 410752 | 410786 | 292  |
| 1 | <a href="#">DNA3-1 AAe</a>   | DNA | 411405 | 411495 | 667  |
| 1 | <a href="#">DNA-5 AAe</a>    | DNA | 31276  | 31321  | 296  |
| 1 | <a href="#">DNA-5 AAe</a>    | DNA | 37649  | 37728  | 466  |
| 1 | <a href="#">DNA-5 AAe</a>    | DNA | 47327  | 47580  | 708  |
| 1 | <a href="#">DNA-5 AAe</a>    | DNA | 81590  | 81835  | 1117 |
| 1 | <a href="#">DNA-5 AAe</a>    | DNA | 105819 | 105847 | 217  |
| 1 | <a href="#">DNA-5 AAe</a>    | DNA | 105894 | 106086 | 449  |
| 1 | <a href="#">DNA-5 AAe</a>    | DNA | 110805 | 110921 | 455  |
| 1 | <a href="#">DNA-5 AAe</a>    | DNA | 167625 | 168110 | 3282 |
| 1 | <a href="#">DNA-5 AAe</a>    | DNA | 168114 | 168165 | 259  |
| 1 | <a href="#">DNA-5 AAe</a>    | DNA | 168166 | 168360 | 1086 |
| 1 | <a href="#">DNA-5 AAe</a>    | DNA | 168368 | 168427 | 365  |
| 1 | <a href="#">DNA-5 AAe</a>    | DNA | 169175 | 169433 | 1963 |
| 1 | <a href="#">DNA-5 AAe</a>    | DNA | 228435 | 228487 | 289  |
| 1 | <a href="#">DNA-5 AAe</a>    | DNA | 255673 | 255735 | 315  |
| 1 | <a href="#">DNA-5 AAe</a>    | DNA | 255798 | 255843 | 233  |
| 1 | <a href="#">DNA-5 AAe</a>    | DNA | 262651 | 262829 | 595  |
| 1 | <a href="#">DNA-5 AAe</a>    | DNA | 335066 | 335110 | 259  |
| 1 | <a href="#">DNA-5 AAe</a>    | DNA | 375363 | 375579 | 408  |
| 1 | <a href="#">DNA-5 AAe</a>    | DNA | 422356 | 422579 | 363  |
| 5 | <a href="#">DNA-5 AAe</a>    | DNA | 4457   | 4699   | 620  |
| 5 | <a href="#">DNA-5 AAe</a>    | DNA | 20147  | 20400  | 637  |
| 5 | <a href="#">DNA-5 AAe</a>    | DNA | 36803  | 36885  | 461  |
| 5 | <a href="#">DNA-5 AAe</a>    | DNA | 39491  | 39976  | 1840 |
| 5 | <a href="#">DNA-5 AAe</a>    | DNA | 41231  | 41304  | 334  |
| 5 | <a href="#">DNA-5 AAe</a>    | DNA | 41318  | 41396  | 457  |
| 1 | <a href="#">DNA5-1 AAe</a>   | DNA | 157134 | 157309 | 485  |
| 1 | <a href="#">DNA5-1 AAe</a>   | DNA | 216308 | 216609 | 1557 |
| 1 | <a href="#">DNA5-1 AAe</a>   | DNA | 216623 | 216736 | 838  |
| 1 | <a href="#">DNA5-1 AAe</a>   | DNA | 391818 | 392213 | 1721 |
| 1 | <a href="#">DNA5-1 AAe</a>   | DNA | 398366 | 398492 | 211  |
| 6 | <a href="#">DNA5-1 AAe</a>   | DNA | 4290   | 4442   | 728  |
| 6 | <a href="#">DNA5-1 AAe</a>   | DNA | 4490   | 4556   | 413  |
| 1 | <a href="#">DNA-6 AAe</a>    | DNA | 168437 | 168598 | 522  |
| 1 | <a href="#">DNA-6 AAe</a>    | DNA | 311941 | 312098 | 373  |
| 1 | <a href="#">DNA-6 AAe</a>    | DNA | 364368 | 364489 | 510  |
| 1 | <a href="#">DNA-6-N6 DR</a>  | DNA | 230292 | 230394 | 238  |
| 1 | <a href="#">DNA-7 AAe</a>    | DNA | 15695  | 16014  | 1328 |
| 1 | <a href="#">DNA-7 AAe</a>    | DNA | 186933 | 187005 | 373  |
| 5 | <a href="#">DNA-7 AAe</a>    | DNA | 34972  | 35414  | 2454 |
| 6 | <a href="#">DNA-7 AAe</a>    | DNA | 31564  | 32008  | 2439 |
| 1 | <a href="#">DNA7-1 AAe</a>   | DNA | 37300  | 37577  | 2066 |
| 1 | <a href="#">DNA7-1 AAe</a>   | DNA | 145587 | 145687 | 288  |
| 1 | <a href="#">DNA7-1 AAe</a>   | DNA | 146581 | 146717 | 292  |
| 1 | <a href="#">DNA7-1 AAe</a>   | DNA | 241227 | 241520 | 2334 |
| 1 | <a href="#">DNA7-1 AAe</a>   | DNA | 364254 | 364367 | 922  |
| 1 | <a href="#">DNA-8 AAe</a>    | DNA | 23816  | 23920  | 296  |
| 5 | <a href="#">DNA8-1 AAe</a>   | DNA | 9161   | 9260   | 645  |

|   |                               |           |        |        |      |
|---|-------------------------------|-----------|--------|--------|------|
| 6 | <a href="#">DNA8-1 AAe</a>    | DNA       | 18937  | 19063  | 543  |
| 1 | <a href="#">DNA8-101 AP</a>   | DNA       | 148122 | 148153 | 214  |
| 1 | <a href="#">DNA8-11 CQ</a>    | DNA       | 205760 | 205846 | 416  |
| 1 | <a href="#">DNA8-2 AAe</a>    | DNA       | 207465 | 207573 | 472  |
| 1 | <a href="#">DNA8-2 AAe</a>    | DNA       | 207688 | 207935 | 891  |
| 1 | <a href="#">DNA8-2 AAe</a>    | DNA       | 209913 | 210272 | 1467 |
| 1 | <a href="#">DNA8-2 AAe</a>    | DNA       | 327155 | 327239 | 242  |
| 6 | <a href="#">DNA8-7 DR</a>     | DNA       | 18458  | 18500  | 212  |
| 1 | <a href="#">DNA8-8 CQ</a>     | DNA       | 48545  | 48611  | 223  |
| 1 | <a href="#">DNA8-8 CQ</a>     | DNA       | 367814 | 367850 | 237  |
| 5 | <a href="#">DNA8-8 CQ</a>     | DNA       | 11650  | 11712  | 254  |
| 1 | <a href="#">DNA8-9 CQ</a>     | DNA       | 126173 | 126231 | 249  |
| 1 | <a href="#">DNA-9 CQ</a>      | DNA       | 404627 | 404690 | 217  |
| 1 | <a href="#">DNA-9-1A SBI</a>  | DNA       | 267677 | 267743 | 214  |
| 1 | <a href="#">DNA9-2 AAe</a>    | DNA       | 52585  | 52644  | 214  |
| 1 | <a href="#">DNA9-2 AAe</a>    | DNA       | 377259 | 377362 | 575  |
| 1 | <a href="#">DNA9NNN1 DR</a>   | DNA       | 142460 | 142511 | 205  |
| 1 | <a href="#">DNA-TA-1 AAe</a>  | DNA       | 200908 | 200999 | 320  |
| 1 | <a href="#">DNA-TA-1 AAe</a>  | DNA       | 341019 | 341063 | 244  |
| 1 | <a href="#">DNA-TA-1 AAe</a>  | DNA       | 341654 | 341683 | 240  |
| 1 | <a href="#">DNA-TA-3 CQ</a>   | DNA       | 405583 | 405681 | 400  |
| 1 | <a href="#">DNA-TA-4 AAe</a>  | DNA       | 149674 | 149774 | 284  |
| 1 | <a href="#">DNA-TA-4 AAe</a>  | DNA       | 350603 | 351207 | 3875 |
| 1 | <a href="#">DNA-TA-4 CQ</a>   | DNA       | 85610  | 85717  | 364  |
| 1 | <a href="#">DNA-TA-6 AAe</a>  | DNA       | 18695  | 18895  | 629  |
| 1 | <a href="#">DNA-TA-6 AAe</a>  | DNA       | 92408  | 92601  | 470  |
| 1 | <a href="#">DNA-TA-6 AAe</a>  | DNA       | 207019 | 207128 | 290  |
| 1 | <a href="#">DNA-TA-6 AAe</a>  | DNA       | 231213 | 231465 | 1134 |
| 1 | <a href="#">DNA-TA-6 AAe</a>  | DNA       | 232306 | 232338 | 220  |
| 1 | <a href="#">DNA-TA-6 AAe</a>  | DNA       | 233684 | 233893 | 936  |
| 1 | <a href="#">DNA-TA-6 AAe</a>  | DNA       | 297089 | 297160 | 287  |
| 1 | <a href="#">DNA-TA-6 AAe</a>  | DNA       | 403135 | 403375 | 684  |
| 5 | <a href="#">DNA-TA-6 AAe</a>  | DNA       | 29556  | 29594  | 230  |
| 1 | <a href="#">DNA-TA-6 CQ</a>   | DNA       | 134016 | 134116 | 245  |
| 1 | <a href="#">DNA-TA-7 AAe</a>  | DNA       | 47662  | 47775  | 318  |
| 1 | <a href="#">DNA-TA-7 AAe</a>  | DNA       | 106157 | 106276 | 317  |
| 1 | <a href="#">DNA-TA-7 AAe</a>  | DNA       | 143973 | 144122 | 258  |
| 1 | <a href="#">DNA-TA-7 AAe</a>  | DNA       | 422128 | 422267 | 368  |
| 5 | <a href="#">DNA-TA-7 AAe</a>  | DNA       | 9354   | 9411   | 270  |
| 5 | <a href="#">DNA-TA-7 AAe</a>  | DNA       | 20480  | 20607  | 397  |
| 1 | <a href="#">DNA-TA-8 AAe</a>  | DNA       | 226467 | 226556 | 397  |
| 1 | <a href="#">DNA-TA-8 AAe</a>  | DNA       | 226761 | 226804 | 253  |
| 1 | <a href="#">DNA-TA-8 AAe</a>  | DNA       | 402913 | 403050 | 962  |
| 1 | <a href="#">DNA-TA-8 AAe</a>  | DNA       | 420569 | 420662 | 602  |
| 1 | <a href="#">DNA-TTAA-5 NV</a> | DNA       | 259247 | 259307 | 211  |
| 1 | <a href="#">DNAX-7 SP</a>     | DNA       | 53837  | 53923  | 253  |
| 1 | <a href="#">EnSpm-1 AA</a>    | DNA       | 34675  | 34834  | 499  |
| 1 | <a href="#">EnSpm-1 AA</a>    | DNA       | 216188 | 216280 | 273  |
| 1 | <a href="#">EnSpm-1 AA</a>    | DNA       | 297172 | 297225 | 228  |
| 1 | <a href="#">EnSpm-1 AA</a>    | DNA       | 302057 | 302209 | 658  |
| 1 | <a href="#">EnSpm-1 AA</a>    | DNA       | 390590 | 390639 | 239  |
| 5 | <a href="#">EnSpm-1 AA</a>    | DNA       | 12583  | 12646  | 420  |
| 5 | <a href="#">EnSpm-1 AA</a>    | DNA       | 26416  | 26508  | 239  |
| 6 | <a href="#">EnSpm-1 AA</a>    | DNA       | 13660  | 13693  | 280  |
| 6 | <a href="#">EnSpm-1 AA</a>    | DNA       | 13699  | 13932  | 788  |
| 6 | <a href="#">EnSpm-1 AA</a>    | DNA       | 17638  | 17799  | 616  |
| 6 | <a href="#">EnSpm-1 AA</a>    | DNA       | 17813  | 17883  | 366  |
| 6 | <a href="#">EnSpm-1 AA</a>    | DNA       | 22730  | 22808  | 253  |
| 6 | <a href="#">EnSpm-1 AA</a>    | DNA       | 23135  | 23203  | 316  |
| 1 | <a href="#">EnSpm-1 HV</a>    | DNA/EnSpm | 248931 | 249003 | 243  |
| 1 | <a href="#">ENSPM2 VV</a>     | DNA/EnSpm | 325510 | 325557 | 201  |
| 1 | <a href="#">ENSPM2 VV</a>     | DNA/EnSpm | 367357 | 367540 | 213  |
| 1 | <a href="#">EnSpm-22 SBI</a>  | DNA/EnSpm | 164350 | 164559 | 324  |

|   |                                |                     |        |        |      |
|---|--------------------------------|---------------------|--------|--------|------|
| 1 | <a href="#">EnSpm-3_HM</a>     | DNA/EnSpm           | 300863 | 300934 | 207  |
| 1 | <a href="#">EnSpm-4_HM</a>     | DNA/EnSpm           | 419502 | 419540 | 203  |
| 1 | <a href="#">EnSpm-6_VV</a>     | DNA/EnSpm           | 265188 | 265246 | 209  |
| 1 | <a href="#">EnSpm-6_VV</a>     | DNA/EnSpm           | 340235 | 340336 | 202  |
| 1 | <a href="#">EnSpm-N1_AT</a>    | DNA/EnSpm           | 269730 | 269794 | 234  |
| 1 | <a href="#">EnSpm-N17_SBi</a>  | DNA/EnSpm           | 270411 | 270503 | 264  |
| 1 | <a href="#">EnSpm-N37_SBi</a>  | DNA/EnSpm           | 33233  | 33301  | 216  |
| 6 | <a href="#">ERE2_EH</a>        | Interspersed_Repeat | 36820  | 36903  | 220  |
| 6 | <a href="#">ERE2_EH</a>        | Interspersed_Repeat | 38623  | 38724  | 245  |
| 1 | <a href="#">ERV1-N7-I_DR</a>   | ERV/ERV1            | 153187 | 153246 | 219  |
| 1 | <a href="#">ERV2_MD_I</a>      | ERV/ERV1            | 378446 | 378488 | 215  |
| 1 | <a href="#">ERV2-1N-OP_I</a>   | ERV/ERV2            | 410811 | 410866 | 229  |
| 1 | <a href="#">ERV2-5_Pca-LTR</a> | ERV/ERV2            | 98592  | 98656  | 212  |
| 1 | <a href="#">FEILAI_AA</a>      | NonLTR/SINE         | 64277  | 64321  | 307  |
| 1 | <a href="#">FEILAI_AA</a>      | NonLTR/SINE         | 65109  | 65185  | 588  |
| 1 | <a href="#">FEILAI_AA</a>      | NonLTR/SINE         | 151645 | 151693 | 446  |
| 1 | <a href="#">FEILAI_AA</a>      | NonLTR/SINE         | 154708 | 154816 | 456  |
| 1 | <a href="#">FEILAI_AA</a>      | NonLTR/SINE         | 203357 | 203460 | 825  |
| 1 | <a href="#">FEILAI_AA</a>      | NonLTR/SINE         | 391187 | 391306 | 583  |
| 5 | <a href="#">FEILAI_AA</a>      | NonLTR/SINE         | 39985  | 40025  | 237  |
| 5 | <a href="#">FEILAI_AA</a>      | NonLTR/SINE         | 40075  | 40343  | 1946 |
| 6 | <a href="#">FEILAI_AA</a>      | NonLTR/SINE         | 9233   | 9300   | 478  |
| 1 | <a href="#">FEILAI_B</a>       | NonLTR/SINE/SINE2   | 38423  | 38699  | 2321 |
| 1 | <a href="#">FEILAI_B</a>       | NonLTR/SINE/SINE2   | 42000  | 42282  | 2359 |
| 1 | <a href="#">FEILAI_B</a>       | NonLTR/SINE/SINE2   | 128786 | 129070 | 2254 |
| 1 | <a href="#">FEILAI_B</a>       | NonLTR/SINE/SINE2   | 145731 | 145924 | 962  |
| 1 | <a href="#">FEILAI_B</a>       | NonLTR/SINE/SINE2   | 179295 | 179421 | 857  |
| 1 | <a href="#">FEILAI_B</a>       | NonLTR/SINE/SINE2   | 187493 | 187772 | 2063 |
| 1 | <a href="#">FEILAI_B</a>       | NonLTR/SINE/SINE2   | 199760 | 200000 | 1874 |
| 1 | <a href="#">FEILAI_B</a>       | NonLTR/SINE/SINE2   | 200639 | 200907 | 2129 |
| 1 | <a href="#">FEILAI_B</a>       | NonLTR/SINE/SINE2   | 225088 | 225235 | 1111 |
| 1 | <a href="#">FEILAI_B</a>       | NonLTR/SINE/SINE2   | 225745 | 225878 | 977  |
| 1 | <a href="#">FEILAI_B</a>       | NonLTR/SINE/SINE2   | 238703 | 238988 | 2084 |
| 1 | <a href="#">FEILAI_B</a>       | NonLTR/SINE/SINE2   | 258472 | 258681 | 1769 |
| 1 | <a href="#">FEILAI_B</a>       | NonLTR/SINE/SINE2   | 272160 | 272443 | 2390 |
| 1 | <a href="#">FEILAI_B</a>       | NonLTR/SINE/SINE2   | 310636 | 310920 | 2601 |
| 1 | <a href="#">FEILAI_B</a>       | NonLTR/SINE/SINE2   | 364092 | 364238 | 1072 |
| 1 | <a href="#">FEILAI_B</a>       | NonLTR/SINE/SINE2   | 391437 | 391542 | 504  |
| 1 | <a href="#">FEILAI_B</a>       | NonLTR/SINE/SINE2   | 399501 | 399768 | 1633 |
| 5 | <a href="#">FEILAI_B</a>       | NonLTR/SINE/SINE2   | 10079  | 10363  | 2122 |
| 1 | <a href="#">FEILAI-1B_A Ae</a> | NonLTR/SINE         | 50392  | 50678  | 2214 |
| 1 | <a href="#">FEILAI-1B_A Ae</a> | NonLTR/SINE         | 155374 | 155447 | 654  |
| 1 | <a href="#">FEILAI-1B_A Ae</a> | NonLTR/SINE         | 250243 | 250522 | 2133 |
| 1 | <a href="#">FEILAI-1B_A Ae</a> | NonLTR/SINE         | 256170 | 256340 | 999  |
| 1 | <a href="#">FEILAI-1B_A Ae</a> | NonLTR/SINE         | 294301 | 294398 | 388  |
| 1 | <a href="#">FEILAI-1B_A Ae</a> | NonLTR/SINE         | 298673 | 298956 | 2500 |
| 1 | <a href="#">FEILAI-1B_A Ae</a> | NonLTR/SINE         | 307440 | 307721 | 2357 |
| 1 | <a href="#">FEILAI-1B_A Ae</a> | NonLTR/SINE         | 325658 | 325780 | 765  |
| 5 | <a href="#">FEILAI-1B_A Ae</a> | NonLTR/SINE         | 21642  | 21923  | 2201 |
| 1 | <a href="#">Gecko</a>          | NonLTR/SINE/SINE2   | 65210  | 65397  | 1504 |
| 1 | <a href="#">Gecko</a>          | NonLTR/SINE/SINE2   | 402008 | 402126 | 827  |
| 5 | <a href="#">Gecko</a>          | NonLTR/SINE/SINE2   | 4905   | 5086   | 757  |
| 5 | <a href="#">Gecko</a>          | NonLTR/SINE/SINE2   | 40035  | 40074  | 321  |
| 6 | <a href="#">Ginger2-1_TS</a>   | DNA/Ginger2         | 14024  | 14080  | 206  |
| 6 | <a href="#">Gyp_LTR_MT</a>     | LTR/Gypsy           | 8998   | 9060   | 206  |
| 5 | <a href="#">Gypsy-10_ES-I</a>  | LTR/Gypsy           | 41693  | 41762  | 221  |
| 1 | <a href="#">Gypsy-111_AA-I</a> | LTR/Gypsy           | 133331 | 133376 | 255  |
| 1 | <a href="#">Gypsy-111_AA-I</a> | LTR/Gypsy           | 158931 | 158974 | 212  |
| 1 | <a href="#">Gypsy-111_AA-I</a> | LTR/Gypsy           | 340367 | 340511 | 419  |
| 1 | <a href="#">Gypsy-111_AA-I</a> | LTR/Gypsy           | 340853 | 340898 | 237  |
| 1 | <a href="#">Gypsy-111_AA-I</a> | LTR/Gypsy           | 415562 | 416363 | 4262 |
| 4 | <a href="#">Gypsy-111_AA-I</a> | LTR/Gypsy           | 4951   | 5017   | 276  |
| 5 | <a href="#">Gypsy-111_AA-I</a> | LTR/Gypsy           | 12773  | 12991  | 772  |

|   |                                   |           |        |        |      |
|---|-----------------------------------|-----------|--------|--------|------|
| 1 | <a href="#">Gypsy-115 AA-I</a>    | LTR/Gypsy | 78954  | 79210  | 2068 |
| 1 | <a href="#">Gypsy-115 AA-I</a>    | LTR/Gypsy | 103952 | 104212 | 2010 |
| 1 | <a href="#">Gypsy-115 AA-I</a>    | LTR/Gypsy | 244360 | 244614 | 1960 |
| 1 | <a href="#">Gypsy13-I SP</a>      | LTR/Gypsy | 79944  | 79988  | 233  |
| 1 | <a href="#">Gypsy-14N PPa-LTR</a> | LTR/Gypsy | 27844  | 27957  | 253  |
| 1 | <a href="#">Gypsy-14N PPa-LTR</a> | LTR/Gypsy | 217391 | 217507 | 210  |
| 1 | <a href="#">Gypsy-154 AA-I</a>    | LTR/Gypsy | 25105  | 25449  | 804  |
| 1 | <a href="#">Gypsy-154 AA-I</a>    | LTR/Gypsy | 25571  | 25674  | 503  |
| 1 | <a href="#">Gypsy-154 AA-I</a>    | LTR/Gypsy | 260270 | 260375 | 288  |
| 1 | <a href="#">Gypsy-154 AA-I</a>    | LTR/Gypsy | 281617 | 281739 | 933  |
| 1 | <a href="#">Gypsy-154 AA-I</a>    | LTR/Gypsy | 282878 | 283161 | 1742 |
| 6 | <a href="#">Gypsy156-LTR DR</a>   | LTR/Gypsy | 25817  | 25883  | 235  |
| 1 | <a href="#">GYPSY16-I AG</a>      | LTR/Gypsy | 345617 | 345720 | 222  |
| 1 | <a href="#">Gypsy16-I Dya</a>     | LTR/Gypsy | 297608 | 297670 | 221  |
| 1 | <a href="#">Gypsy-181 AA-I</a>    | LTR/Gypsy | 161762 | 161810 | 304  |
| 5 | <a href="#">Gypsy-188 AA-LTR</a>  | LTR/Gypsy | 31518  | 31609  | 249  |
| 1 | <a href="#">Gypsy-18-I NVi</a>    | LTR/Gypsy | 315885 | 315946 | 201  |
| 6 | <a href="#">Gypsy-19 DWil-I</a>   | LTR/Gypsy | 38575  | 38603  | 214  |
| 1 | <a href="#">Gypsy-197 AA-I</a>    | LTR/Gypsy | 188035 | 189044 | 8125 |
| 1 | <a href="#">Gypsy-2 OD-I</a>      | LTR/Gypsy | 73087  | 73162  | 239  |
| 1 | <a href="#">Gypsy-20 OD-I</a>     | LTR/Gypsy | 33542  | 33584  | 200  |
| 1 | <a href="#">Gypsy-21 MLP-I</a>    | LTR/Gypsy | 130448 | 130501 | 226  |
| 5 | <a href="#">Gypsy-21-I DR</a>     | LTR/Gypsy | 30630  | 30679  | 252  |
| 1 | <a href="#">Gypsy-220 AA-LTR</a>  | LTR/Gypsy | 332450 | 332542 | 301  |
| 1 | <a href="#">Gypsy-226 AA-I</a>    | LTR/Gypsy | 33889  | 33951  | 340  |
| 1 | <a href="#">Gypsy-227 AA-I</a>    | LTR/Gypsy | 111311 | 111751 | 1388 |
| 1 | <a href="#">Gypsy-23 CQ-I</a>     | LTR/Gypsy | 343753 | 343795 | 229  |
| 1 | <a href="#">Gypsy-23 OD-I</a>     | LTR/Gypsy | 333863 | 333924 | 234  |
| 5 | <a href="#">Gypsy-243 AA-I</a>    | LTR/Gypsy | 25159  | 25275  | 214  |
| 1 | <a href="#">Gypsy-245 AA-LTR</a>  | LTR/Gypsy | 84336  | 84405  | 305  |
| 1 | <a href="#">Gypsy-247 AA-I</a>    | LTR/Gypsy | 226807 | 226886 | 227  |
| 1 | <a href="#">Gypsy-255 AA-I</a>    | LTR/Gypsy | 257682 | 257753 | 351  |
| 1 | <a href="#">Gypsy-255 AA-I</a>    | LTR/Gypsy | 258138 | 258227 | 394  |
| 1 | <a href="#">Gypsy-255 AA-I</a>    | LTR/Gypsy | 261786 | 261925 | 549  |
| 1 | <a href="#">Gypsy-255 AA-I</a>    | LTR/Gypsy | 261931 | 262138 | 1518 |
| 1 | <a href="#">Gypsy-255 AA-I</a>    | LTR/Gypsy | 312437 | 312580 | 911  |
| 1 | <a href="#">Gypsy-256 AA-I</a>    | LTR/Gypsy | 206709 | 206951 | 1327 |
| 1 | <a href="#">Gypsy-257 AA-I</a>    | LTR/Gypsy | 422063 | 422121 | 336  |
| 5 | <a href="#">Gypsy-257 AA-I</a>    | LTR/Gypsy | 20625  | 20812  | 1342 |
| 1 | <a href="#">Gypsy-258 AA-I</a>    | LTR/Gypsy | 133231 | 133313 | 612  |
| 4 | <a href="#">Gypsy-258 AA-I</a>    | LTR/Gypsy | 2850   | 2914   | 383  |
| 6 | <a href="#">Gypsy-258 AA-I</a>    | LTR/Gypsy | 15147  | 15261  | 838  |
| 1 | <a href="#">Gypsy-259 AA-I</a>    | LTR/Gypsy | 260418 | 260544 | 860  |
| 1 | <a href="#">Gypsy-259 AA-I</a>    | LTR/Gypsy | 412438 | 412608 | 427  |
| 6 | <a href="#">Gypsy-259 AA-I</a>    | LTR/Gypsy | 14900  | 14962  | 372  |
| 6 | <a href="#">Gypsy-26 DPu-I</a>    | LTR/Gypsy | 26985  | 27049  | 263  |
| 1 | <a href="#">Gypsy-29 VV-I</a>     | LTR/Gypsy | 75964  | 75997  | 200  |
| 1 | <a href="#">Gypsy2-I Dmoj</a>     | LTR/Gypsy | 167070 | 167318 | 217  |
| 1 | <a href="#">Gypsy3 MH-I</a>       | LTR/Gypsy | 318330 | 318360 | 214  |
| 1 | <a href="#">Gypsy-3 PPM-I</a>     | LTR/Gypsy | 98195  | 98229  | 222  |
| 6 | <a href="#">Gypsy-38 DPu-I</a>    | LTR/Gypsy | 21175  | 21249  | 210  |
| 1 | <a href="#">Gypsy-45 BD-I</a>     | LTR/Gypsy | 406169 | 406212 | 249  |
| 1 | <a href="#">GYPSY49-I AG</a>      | LTR/Gypsy | 361881 | 361943 | 208  |
| 1 | <a href="#">Gypsy4-SM I</a>       | LTR/Gypsy | 82786  | 82900  | 216  |
| 6 | <a href="#">Gypsy-54 AA-LTR</a>   | LTR/Gypsy | 30645  | 30690  | 223  |
| 1 | <a href="#">Gypsy-589 AA-I</a>    | LTR/Gypsy | 315513 | 315571 | 217  |
| 1 | <a href="#">Gypsy-594 AA-I</a>    | LTR/Gypsy | 47788  | 47990  | 1676 |
| 1 | <a href="#">Gypsy-594 AA-I</a>    | LTR/Gypsy | 106277 | 106489 | 1447 |
| 1 | <a href="#">Gypsy-597 AA-I</a>    | LTR/Gypsy | 244740 | 244786 | 230  |
| 1 | <a href="#">Gypsy-597 AA-I</a>    | LTR/Gypsy | 245216 | 245269 | 233  |
| 1 | <a href="#">Gypsy-597 AA-LTR</a>  | LTR/Gypsy | 380898 | 381460 | 5031 |
| 5 | <a href="#">Gypsy-65 AA-LTR</a>   | LTR/Gypsy | 24725  | 24809  | 328  |
| 1 | <a href="#">Gypsy6-I AP</a>       | LTR/Gypsy | 268688 | 268742 | 211  |

|   |                                |               |        |        |      |
|---|--------------------------------|---------------|--------|--------|------|
| 1 | <a href="#">Gypsy6-NVi_I</a>   | LTR/Gypsy     | 142666 | 142705 | 207  |
| 6 | <a href="#">Gypsy-71_CQ-I</a>  | LTR/Gypsy     | 21719  | 21750  | 212  |
| 1 | <a href="#">Gypsy-86_AA-I</a>  | LTR/Gypsy     | 390689 | 390912 | 883  |
| 1 | <a href="#">Gypsy-88_CQ-I</a>  | LTR/Gypsy     | 204087 | 204149 | 311  |
| 1 | <a href="#">Gypsy-9_OD-I</a>   | LTR/Gypsy     | 267941 | 268038 | 205  |
| 5 | <a href="#">GYPSY9-I_AG</a>    | LTR/Gypsy     | 18328  | 18396  | 208  |
| 1 | <a href="#">HAL1-3_Cho</a>     | NonLTR/L1     | 42705  | 42777  | 253  |
| 1 | <a href="#">HAL1-4_Cho</a>     | NonLTR/L1     | 334677 | 334724 | 220  |
| 6 | <a href="#">HAL1B</a>          | NonLTR/L1     | 1981   | 2018   | 223  |
| 1 | <a href="#">HARBINGER3_DR</a>  | DNA/Harbinger | 269015 | 269144 | 217  |
| 2 | <a href="#">Harbinger-4_BF</a> | DNA/Harbinger | 5649   | 5704   | 227  |
| 1 | <a href="#">HARB-N5_Mad</a>    | DNA/Harbinger | 25512  | 25555  | 232  |
| 1 | <a href="#">hAT-10_XT</a>      | DNA/hAT       | 184395 | 184468 | 272  |
| 5 | <a href="#">hAT-12_XT</a>      | DNA/hAT       | 13173  | 13227  | 262  |
| 1 | <a href="#">hAT-13_HM</a>      | DNA/hAT       | 337348 | 337417 | 222  |
| 1 | <a href="#">hAT-15_SM</a>      | DNA/hAT       | 35061  | 35165  | 235  |
| 6 | <a href="#">hAT-2_NV</a>       | DNA/hAT       | 14624  | 14674  | 230  |
| 1 | <a href="#">hAT-28_HM</a>      | DNA/hAT       | 66962  | 67058  | 237  |
| 1 | <a href="#">HAT3_CB</a>        | DNA/hAT       | 328372 | 328508 | 312  |
| 1 | <a href="#">hAT5-3_NV</a>      | DNA/hAT       | 175089 | 175142 | 234  |
| 6 | <a href="#">hAT5-3_NV</a>      | DNA/hAT       | 11171  | 11224  | 236  |
| 5 | <a href="#">hAT-58_HM</a>      | DNA/hAT       | 43126  | 43191  | 205  |
| 1 | <a href="#">hAT-6_SM</a>       | DNA/hAT       | 373731 | 373793 | 205  |
| 6 | <a href="#">hAT-6_VV</a>       | DNA/hAT       | 21945  | 22028  | 211  |
| 1 | <a href="#">hAT-63_HM</a>      | DNA/hAT       | 169603 | 169666 | 275  |
| 6 | <a href="#">hAT-68_HM</a>      | DNA/hAT       | 39255  | 39315  | 204  |
| 1 | <a href="#">hAT-7_AP</a>       | DNA/hAT       | 42359  | 42399  | 221  |
| 1 | <a href="#">hAT-72_HM</a>      | DNA/hAT       | 1143   | 1267   | 236  |
| 1 | <a href="#">hAT-81_HM</a>      | DNA/hAT       | 319455 | 319506 | 238  |
| 6 | <a href="#">hAT-83_HMa</a>     | DNA/hAT       | 9093   | 9165   | 291  |
| 1 | <a href="#">hATm-1_HM</a>      | DNA/hAT       | 35554  | 35611  | 200  |
| 1 | <a href="#">hATm-38_HM</a>     | DNA/hAT       | 264771 | 264808 | 221  |
| 1 | <a href="#">hATm-47_HM</a>     | DNA/hAT       | 199315 | 199372 | 234  |
| 1 | <a href="#">hAT-N1B_CQ</a>     | DNA/hAT       | 157605 | 157655 | 305  |
| 1 | <a href="#">hAT-N22_DR</a>     | DNA/hAT       | 328636 | 329141 | 501  |
| 1 | <a href="#">hATx-10_SM</a>     | DNA/hAT       | 42617  | 42654  | 218  |
| 1 | <a href="#">HELITRON1_CE</a>   | DNA/Helitron  | 2024   | 2081   | 239  |
| 5 | <a href="#">HELITRON1_CE</a>   | DNA/Helitron  | 34577  | 34650  | 246  |
| 1 | <a href="#">Helitron-2_AAe</a> | DNA/Helitron  | 112318 | 112347 | 234  |
| 1 | <a href="#">Helitron-2_AAe</a> | DNA/Helitron  | 112857 | 113864 | 8064 |
| 1 | <a href="#">Helitron2_PPp</a>  | DNA/Helitron  | 32456  | 32509  | 202  |
| 1 | <a href="#">HELITRON7_CB</a>   | DNA/Helitron  | 317101 | 317289 | 249  |
| 5 | <a href="#">HELITRON7_CB</a>   | DNA/Helitron  | 43983  | 44445  | 447  |
| 5 | <a href="#">HELITRON7_CB</a>   | DNA/Helitron  | 44688  | 45170  | 337  |
| 5 | <a href="#">HELITRON7_CB</a>   | DNA/Helitron  | 45345  | 45712  | 274  |
| 6 | <a href="#">HELITRON9A_CB</a>  | DNA/Helitron  | 3536   | 3621   | 205  |
| 1 | <a href="#">HELITRONY1E</a>    | DNA/Helitron  | 224331 | 224384 | 213  |
| 5 | <a href="#">I_Ele18</a>        | NonLTR/I      | 34675  | 34729  | 451  |
| 1 | <a href="#">I_Ele20</a>        | NonLTR/I      | 288270 | 288629 | 789  |
| 1 | <a href="#">I_Ele43</a>        | NonLTR/I      | 287539 | 288269 | 4267 |
| 1 | <a href="#">I_Ele8</a>         | NonLTR/I      | 32902  | 32933  | 221  |
| 1 | <a href="#">I-44_AAe</a>       | NonLTR/I      | 269145 | 269243 | 722  |
| 1 | <a href="#">I-44_AAe</a>       | NonLTR/I      | 269244 | 269552 | 2364 |
| 1 | <a href="#">I-44_AAe</a>       | NonLTR/I      | 271471 | 271640 | 1241 |
| 1 | <a href="#">I-44_AAe</a>       | NonLTR/I      | 271641 | 271803 | 1182 |
| 1 | <a href="#">I-44_AAe</a>       | NonLTR/I      | 271804 | 271935 | 1039 |
| 1 | <a href="#">I-50_AAe</a>       | NonLTR/I      | 397954 | 398000 | 340  |
| 1 | <a href="#">I-60_AAe</a>       | NonLTR/I      | 196701 | 196939 | 586  |
| 1 | <a href="#">I-60_AAe</a>       | NonLTR/I      | 225470 | 225723 | 679  |
| 1 | <a href="#">I-76_AAe</a>       | NonLTR/I      | 410019 | 410065 | 249  |
| 1 | <a href="#">I-7B_AAe</a>       | NonLTR/I      | 334300 | 334479 | 1088 |
| 1 | <a href="#">I-7B_AAe</a>       | NonLTR/I      | 334481 | 334577 | 455  |
| 5 | <a href="#">I-7B_AAe</a>       | NonLTR/I      | 25962  | 26063  | 413  |



|   |                               |               |        |        |       |
|---|-------------------------------|---------------|--------|--------|-------|
| 1 | <a href="#">I-7C AAe</a>      | NonLTR/I      | 312614 | 313578 | 5916  |
| 1 | <a href="#">I-80B AAe</a>     | NonLTR/I      | 108040 | 108524 | 2636  |
| 1 | <a href="#">IAPEYI</a>        | ERV/ERV2      | 214533 | 214569 | 230   |
| 6 | <a href="#">IAPLTR4 I</a>     | ERV/ERV2      | 19619  | 19663  | 213   |
| 6 | <a href="#">IBGYPSY1 I</a>    | LTR/Gypsy     | 38470  | 38546  | 221   |
| 1 | <a href="#">ID_B1</a>         | NonLTR/SINE   | 382313 | 382367 | 253   |
| 1 | <a href="#">INVADER3 I</a>    | LTR/Gypsy     | 411241 | 411280 | 204   |
| 1 | <a href="#">ITmD37D Ele1</a>  | DNA/Mariner   | 90667  | 90833  | 654   |
| 1 | <a href="#">ITmD37D Ele1</a>  | DNA/Mariner   | 90837  | 91380  | 1744  |
| 1 | <a href="#">ITmD37D Ele1</a>  | DNA/Mariner   | 91660  | 91757  | 501   |
| 1 | <a href="#">ITmD37D Ele3</a>  | DNA/Mariner   | 227320 | 227410 | 205   |
| 1 | <a href="#">ITmD37D Ele3</a>  | DNA/Mariner   | 227565 | 227723 | 218   |
| 1 | <a href="#">ITmD37D Ele7</a>  | DNA/Mariner   | 413942 | 414065 | 292   |
| 1 | <a href="#">ITmD37E Ele11</a> | DNA/Mariner   | 128544 | 128667 | 279   |
| 1 | <a href="#">ITmD37E Ele9</a>  | DNA/Mariner   | 260586 | 260678 | 309   |
| 1 | <a href="#">JAM1</a>          | NonLTR/RTE    | 62990  | 63447  | 1988  |
| 1 | <a href="#">JAM1</a>          | NonLTR/RTE    | 63454  | 63609  | 619   |
| 1 | <a href="#">JAM1</a>          | NonLTR/RTE    | 170148 | 170433 | 2276  |
| 1 | <a href="#">JAM1</a>          | NonLTR/RTE    | 170434 | 171038 | 4861  |
| 1 | <a href="#">JAM1</a>          | NonLTR/RTE    | 171050 | 172843 | 14523 |
| 1 | <a href="#">JAM1</a>          | NonLTR/RTE    | 172854 | 173065 | 1762  |
| 1 | <a href="#">JAM1</a>          | NonLTR/RTE    | 263867 | 263954 | 478   |
| 1 | <a href="#">JAM1</a>          | NonLTR/RTE    | 300083 | 300379 | 1500  |
| 1 | <a href="#">JAM1B AAe</a>     | NonLTR/RTE    | 67357  | 67443  | 265   |
| 1 | <a href="#">JAM1B AAe</a>     | NonLTR/RTE    | 134600 | 134711 | 396   |
| 1 | <a href="#">JAM1C AAe</a>     | NonLTR/RTE    | 39680  | 39998  | 1946  |
| 1 | <a href="#">JAM1C AAe</a>     | NonLTR/RTE    | 93361  | 94001  | 4457  |
| 1 | <a href="#">JAM1C AAe</a>     | NonLTR/RTE    | 94407  | 94566  | 1037  |
| 1 | <a href="#">JAM1C AAe</a>     | NonLTR/RTE    | 94567  | 96029  | 9892  |
| 1 | <a href="#">JAM1C AAe</a>     | NonLTR/RTE    | 96030  | 96072  | 308   |
| 5 | <a href="#">JAM1C AAe</a>     | NonLTR/RTE    | 28788  | 28852  | 337   |
| 1 | <a href="#">Jockey Ele7</a>   | NonLTR/Jockey | 113900 | 114054 | 451   |
| 1 | <a href="#">Jockey Ele7</a>   | NonLTR/Jockey | 114403 | 114585 | 432   |
| 1 | <a href="#">Jockey Ele7</a>   | NonLTR/Jockey | 114592 | 114624 | 209   |
| 1 | <a href="#">Jockey Ele7</a>   | NonLTR/Jockey | 114975 | 115059 | 449   |
| 1 | <a href="#">Jockey Ele7</a>   | NonLTR/Jockey | 125512 | 125561 | 312   |
| 1 | <a href="#">Jockey-11 AAe</a> | NonLTR/Jockey | 115060 | 115136 | 235   |
| 1 | <a href="#">Jockey-11 AAe</a> | NonLTR/Jockey | 123375 | 123463 | 399   |
| 1 | <a href="#">Jockey-11 AAe</a> | NonLTR/Jockey | 123464 | 123584 | 706   |
| 1 | <a href="#">Jockey-11 AAe</a> | NonLTR/Jockey | 123585 | 124319 | 4006  |
| 1 | <a href="#">Kiri-1 AAe</a>    | NonLTR/Kiri   | 210350 | 210440 | 221   |
| 1 | <a href="#">Kiri-11 CQ</a>    | NonLTR/Kiri   | 53997  | 54882  | 2510  |
| 1 | <a href="#">Kiri-11 CQ</a>    | NonLTR/Kiri   | 54894  | 55853  | 2618  |
| 1 | <a href="#">Kiri-11 CQ</a>    | NonLTR/Kiri   | 60375  | 61203  | 1662  |
| 1 | <a href="#">Kiri-26 AAe</a>   | NonLTR/Kiri   | 51778  | 51897  | 313   |
| 5 | <a href="#">Kiri-35 AAe</a>   | NonLTR/Kiri   | 35677  | 36685  | 8925  |
| 1 | <a href="#">Kiri-6 CQ</a>     | NonLTR/Kiri   | 51991  | 52211  | 457   |
| 1 | <a href="#">Kolobok-13 HM</a> | DNA/Kolobok   | 154227 | 154276 | 209   |
| 1 | <a href="#">Kolobok-16 HM</a> | DNA/Kolobok   | 229867 | 229911 | 214   |
| 6 | <a href="#">L1 Ele13</a>      | NonLTR/L1     | 23394  | 23484  | 454   |
| 6 | <a href="#">L1 Ele13</a>      | NonLTR/L1     | 23485  | 23537  | 273   |
| 1 | <a href="#">L1_RS1 5end</a>   | NonLTR/L1     | 219362 | 219411 | 220   |
| 1 | <a href="#">L1-1 ET</a>       | NonLTR/L1     | 339405 | 339442 | 212   |
| 1 | <a href="#">L1-3 NV</a>       | NonLTR/L1     | 180442 | 180511 | 240   |
| 1 | <a href="#">L1-43 AAe</a>     | NonLTR/L1     | 393005 | 393175 | 961   |
| 6 | <a href="#">L1-5 MD</a>       | NonLTR/L1     | 36308  | 36351  | 222   |
| 6 | <a href="#">L1MC4 5end</a>    | NonLTR/L1     | 38981  | 39033  | 201   |
| 1 | <a href="#">L2B-1 HM</a>      | NonLTR/L2B    | 143812 | 143899 | 201   |
| 1 | <a href="#">L2B-2 AAe</a>     | NonLTR/L2B    | 363438 | 363485 | 205   |
| 1 | <a href="#">Lian-Aa1</a>      | NonLTR/Loa    | 76552  | 76658  | 542   |
| 1 | <a href="#">Lian-Aa1</a>      | NonLTR/Loa    | 76659  | 76903  | 1043  |
| 1 | <a href="#">Lian-Aa1</a>      | NonLTR/Loa    | 80884  | 80985  | 354   |
| 1 | <a href="#">Lian-Aa1</a>      | NonLTR/Loa    | 86747  | 86970  | 760   |

|   |                               |               |        |        |       |
|---|-------------------------------|---------------|--------|--------|-------|
| 1 | <a href="#">Lian-Aa1</a>      | NonLTR/Loa    | 304802 | 305153 | 3065  |
| 1 | <a href="#">Lian-Aa1</a>      | NonLTR/Loa    | 317854 | 317912 | 328   |
| 1 | <a href="#">Lian-Aa1</a>      | NonLTR/Loa    | 327900 | 328056 | 1387  |
| 5 | <a href="#">Lian-Aa1</a>      | NonLTR/Loa    | 27510  | 27569  | 432   |
| 5 | <a href="#">Lian-Aa1</a>      | NonLTR/Loa    | 27588  | 27748  | 547   |
| 5 | <a href="#">Lian-Aa1</a>      | NonLTR/Loa    | 27764  | 27935  | 597   |
| 5 | <a href="#">Lian-Aa1</a>      | NonLTR/Loa    | 27936  | 28002  | 280   |
| 5 | <a href="#">Lian-Aa1</a>      | NonLTR/Loa    | 28028  | 28061  | 267   |
| 5 | <a href="#">Lian-Aa1</a>      | NonLTR/Loa    | 28077  | 28276  | 692   |
| 1 | <a href="#">LINE-1 AA</a>     | NonLTR/Jockey | 14847  | 15687  | 7081  |
| 1 | <a href="#">LINE-1 AA</a>     | NonLTR/Jockey | 50214  | 50314  | 357   |
| 1 | <a href="#">LINE-1 AA</a>     | NonLTR/Jockey | 50321  | 50387  | 327   |
| 1 | <a href="#">LINE-1 AA</a>     | NonLTR/Jockey | 50679  | 50888  | 1000  |
| 1 | <a href="#">LINE-1 AA</a>     | NonLTR/Jockey | 50895  | 51082  | 1178  |
| 1 | <a href="#">LINE-1 AA</a>     | NonLTR/Jockey | 81952  | 82059  | 464   |
| 1 | <a href="#">LINE-1 AA</a>     | NonLTR/Jockey | 100305 | 100393 | 543   |
| 1 | <a href="#">LINE-1 AA</a>     | NonLTR/Jockey | 103832 | 103951 | 532   |
| 1 | <a href="#">LINE-1 AA</a>     | NonLTR/Jockey | 104213 | 104954 | 3793  |
| 1 | <a href="#">LINE-1 AA</a>     | NonLTR/Jockey | 104995 | 105818 | 5306  |
| 1 | <a href="#">LINE-1 AA</a>     | NonLTR/Jockey | 106493 | 106616 | 755   |
| 1 | <a href="#">LINE-1 AA</a>     | NonLTR/Jockey | 111752 | 111836 | 392   |
| 1 | <a href="#">LINE-1 AA</a>     | NonLTR/Jockey | 204648 | 205043 | 2225  |
| 1 | <a href="#">LINE-1 AA</a>     | NonLTR/Jockey | 228673 | 229249 | 3750  |
| 1 | <a href="#">LINE-1 AA</a>     | NonLTR/Jockey | 229291 | 229732 | 2582  |
| 1 | <a href="#">LINE-1 AA</a>     | NonLTR/Jockey | 250564 | 252258 | 12435 |
| 1 | <a href="#">LINE-1 AA</a>     | NonLTR/Jockey | 252260 | 254630 | 16092 |
| 1 | <a href="#">LINE-1 AA</a>     | NonLTR/Jockey | 275233 | 275771 | 3062  |
| 1 | <a href="#">LINE-1 AA</a>     | NonLTR/Jockey | 275787 | 275884 | 365   |
| 1 | <a href="#">LINE-1 AA</a>     | NonLTR/Jockey | 303679 | 304465 | 4790  |
| 1 | <a href="#">LINE-1 AA</a>     | NonLTR/Jockey | 304636 | 304791 | 969   |
| 1 | <a href="#">LINE-1 AA</a>     | NonLTR/Jockey | 305154 | 306918 | 11154 |
| 1 | <a href="#">LINE-1 AA</a>     | NonLTR/Jockey | 307324 | 307439 | 731   |
| 1 | <a href="#">LINE-1 AA</a>     | NonLTR/Jockey | 307722 | 307807 | 633   |
| 1 | <a href="#">LINE-1 AA</a>     | NonLTR/Jockey | 307810 | 307867 | 263   |
| 1 | <a href="#">LINE-1 AA</a>     | NonLTR/Jockey | 308934 | 308992 | 282   |
| 1 | <a href="#">LINE-1 AA</a>     | NonLTR/Jockey | 308998 | 309056 | 293   |
| 1 | <a href="#">LINE-1 AA</a>     | NonLTR/Jockey | 309057 | 309490 | 2930  |
| 1 | <a href="#">LINE-1 AA</a>     | NonLTR/Jockey | 352269 | 353051 | 5955  |
| 1 | <a href="#">LINE-1 AA</a>     | NonLTR/Jockey | 353561 | 353660 | 872   |
| 1 | <a href="#">LINE-1 AA</a>     | NonLTR/Jockey | 353927 | 354870 | 7552  |
| 1 | <a href="#">LINE-1 AA</a>     | NonLTR/Jockey | 354871 | 354974 | 572   |
| 1 | <a href="#">LINE-1 AA</a>     | NonLTR/Jockey | 355036 | 357611 | 20790 |
| 1 | <a href="#">LINE-1 AA</a>     | NonLTR/Jockey | 387400 | 387958 | 3418  |
| 1 | <a href="#">LINE-1 AA</a>     | NonLTR/Jockey | 387968 | 388216 | 1154  |
| 1 | <a href="#">LINE-1 AA</a>     | NonLTR/Jockey | 388219 | 388620 | 2888  |
| 1 | <a href="#">LINE-1 AA</a>     | NonLTR/Jockey | 407821 | 407957 | 1050  |
| 1 | <a href="#">LINE-1 AA</a>     | NonLTR/Jockey | 407958 | 408252 | 1480  |
| 1 | <a href="#">LINE1-34 SBi</a>  | NonLTR/L1     | 215824 | 215863 | 227   |
| 1 | <a href="#">LINE1-8 ZM</a>    | NonLTR/L1     | 220005 | 220062 | 208   |
| 1 | <a href="#">LOA Ele4</a>      | NonLTR/Loa    | 109187 | 109239 | 402   |
| 1 | <a href="#">LOA Ele6</a>      | NonLTR/Loa    | 7905   | 8006   | 292   |
| 1 | <a href="#">Loner Ele1</a>    | NonLTR/I      | 82060  | 82164  | 511   |
| 1 | <a href="#">Loner Ele1</a>    | NonLTR/I      | 83451  | 83540  | 575   |
| 1 | <a href="#">Loner Ele1</a>    | NonLTR/I      | 83866  | 83972  | 723   |
| 1 | <a href="#">Loner Ele1</a>    | NonLTR/I      | 232339 | 233022 | 4151  |
| 1 | <a href="#">Loner Ele1</a>    | NonLTR/I      | 233023 | 233681 | 5253  |
| 1 | <a href="#">LTR43 I</a>       | ERV/ERV1      | 365788 | 365876 | 227   |
| 1 | <a href="#">LTR77-int TS</a>  | ERV           | 84442  | 84484  | 223   |
| 1 | <a href="#">Mariner-14 HM</a> | DNA/Mariner   | 407149 | 407196 | 222   |
| 1 | <a href="#">Mariner-3 HM</a>  | DNA/Mariner   | 212020 | 212179 | 220   |
| 1 | <a href="#">Mariner-35 SM</a> | DNA/Mariner   | 35208  | 35258  | 206   |
| 6 | <a href="#">Mariner-6 HM</a>  | DNA/Mariner   | 26417  | 26526  | 252   |
| 5 | <a href="#">MARINER60 CB</a>  | DNA/Mariner   | 3896   | 3940   | 204   |

|   |                               |                     |        |        |      |
|---|-------------------------------|---------------------|--------|--------|------|
| 1 | <a href="#">Mariner-9_HM</a>  | DNA/Mariner         | 206620 | 206683 | 205  |
| 1 | <a href="#">MarinerN-2_AP</a> | DNA/Mariner         | 276778 | 276812 | 224  |
| 1 | <a href="#">Merlin1_CB</a>    | DNA/Merlin          | 65700  | 65761  | 220  |
| 1 | <a href="#">MITE_AA</a>       | Interspersed_Repeat | 248294 | 248438 | 785  |
| 1 | <a href="#">MITE_AA</a>       | Interspersed_Repeat | 248452 | 248486 | 256  |
| 1 | <a href="#">MITE_AA</a>       | Interspersed_Repeat | 272925 | 273444 | 3600 |
| 6 | <a href="#">MOGWAI1_EI</a>    | DNA/Mariner         | 3295   | 3377   | 231  |
| 1 | <a href="#">Mosqu1_Aa2</a>    | NonLTR/I            | 417558 | 417626 | 411  |
| 1 | <a href="#">MSAT-1_AAe</a>    | Simple/Sat/MSAT     | 22481  | 22799  | 600  |
| 1 | <a href="#">MSAT-1_AAe</a>    | Simple/Sat/MSAT     | 22838  | 22981  | 355  |
| 1 | <a href="#">MSAT-1_AAe</a>    | Simple/Sat/MSAT     | 22983  | 23568  | 1110 |
| 1 | <a href="#">MSAT-1_AAe</a>    | Simple/Sat/MSAT     | 23588  | 23744  | 342  |
| 1 | <a href="#">MSAT-1_AAe</a>    | Simple/Sat/MSAT     | 67858  | 67920  | 200  |
| 1 | <a href="#">MSAT-1_AAe</a>    | Simple/Sat/MSAT     | 67927  | 68057  | 337  |
| 1 | <a href="#">MSAT-1_AAe</a>    | Simple/Sat/MSAT     | 68258  | 68529  | 458  |
| 1 | <a href="#">MSAT-1_AAe</a>    | Simple/Sat/MSAT     | 68871  | 69166  | 460  |
| 1 | <a href="#">MSAT-1_AAe</a>    | Simple/Sat/MSAT     | 69654  | 69975  | 665  |
| 1 | <a href="#">MSAT-1_AAe</a>    | Simple/Sat/MSAT     | 70228  | 70703  | 449  |
| 1 | <a href="#">MSAT-1_AAe</a>    | Simple/Sat/MSAT     | 70758  | 70951  | 331  |
| 1 | <a href="#">MSAT-1_AAe</a>    | Simple/Sat/MSAT     | 106650 | 106948 | 363  |
| 1 | <a href="#">MSAT-1_AAe</a>    | Simple/Sat/MSAT     | 202215 | 202287 | 220  |
| 1 | <a href="#">MSAT-1_AAe</a>    | Simple/Sat/MSAT     | 203182 | 203314 | 379  |
| 1 | <a href="#">MSAT-1_AAe</a>    | Simple/Sat/MSAT     | 220108 | 220233 | 262  |
| 1 | <a href="#">MSAT-1_AAe</a>    | Simple/Sat/MSAT     | 238443 | 238675 | 459  |
| 1 | <a href="#">MSAT-1_AAe</a>    | Simple/Sat/MSAT     | 239097 | 239203 | 258  |
| 1 | <a href="#">MSAT-1_AAe</a>    | Simple/Sat/MSAT     | 239205 | 239260 | 231  |
| 1 | <a href="#">MSAT-1_AAe</a>    | Simple/Sat/MSAT     | 239295 | 239869 | 759  |
| 1 | <a href="#">MSAT-1_AAe</a>    | Simple/Sat/MSAT     | 239872 | 239975 | 277  |
| 1 | <a href="#">MSAT-1_AAe</a>    | Simple/Sat/MSAT     | 239988 | 240530 | 1011 |
| 1 | <a href="#">MSAT-1_AAe</a>    | Simple/Sat/MSAT     | 240810 | 241144 | 665  |
| 1 | <a href="#">MSAT-1_AAe</a>    | Simple/Sat/MSAT     | 241546 | 241603 | 203  |
| 1 | <a href="#">MSAT-1_AAe</a>    | Simple/Sat/MSAT     | 241633 | 241975 | 371  |
| 1 | <a href="#">MSAT-1_AAe</a>    | Simple/Sat/MSAT     | 241980 | 242161 | 241  |
| 1 | <a href="#">MSAT-1_AAe</a>    | Simple/Sat/MSAT     | 242464 | 242741 | 423  |
| 1 | <a href="#">MSAT-1_AAe</a>    | Simple/Sat/MSAT     | 242842 | 243401 | 487  |
| 1 | <a href="#">MSAT-1_AAe</a>    | Simple/Sat/MSAT     | 256465 | 256719 | 293  |
| 1 | <a href="#">MSAT-1_AAe</a>    | Simple/Sat/MSAT     | 256800 | 257296 | 575  |
| 1 | <a href="#">MSAT-1_AAe</a>    | Simple/Sat/MSAT     | 273496 | 273592 | 264  |
| 1 | <a href="#">MSAT-1_AAe</a>    | Simple/Sat/MSAT     | 316105 | 316536 | 634  |
| 1 | <a href="#">MSAT-1_AAe</a>    | Simple/Sat/MSAT     | 316570 | 317056 | 749  |
| 1 | <a href="#">MSAT-1_AAe</a>    | Simple/Sat/MSAT     | 364908 | 365132 | 361  |
| 1 | <a href="#">MSAT-1_AAe</a>    | Simple/Sat/MSAT     | 369666 | 370238 | 926  |
| 5 | <a href="#">MSAT-1_AAe</a>    | Simple/Sat/MSAT     | 3133   | 3305   | 283  |
| 5 | <a href="#">MSAT-1_AAe</a>    | Simple/Sat/MSAT     | 13976  | 14132  | 243  |
| 5 | <a href="#">MSAT-1_AAe</a>    | Simple/Sat/MSAT     | 34108  | 34333  | 318  |
| 5 | <a href="#">MSAT-1_AAe</a>    | Simple/Sat/MSAT     | 34830  | 34970  | 295  |
| 5 | <a href="#">MSAT-1_AAe</a>    | Simple/Sat/MSAT     | 35451  | 35539  | 253  |
| 1 | <a href="#">MSAT-2_AAe</a>    | Simple/Sat/MSAT     | 217514 | 217594 | 237  |
| 1 | <a href="#">MSAT-2_AAe</a>    | Simple/Sat/MSAT     | 337062 | 337242 | 332  |
| 1 | <a href="#">MSAT-2_AAe</a>    | Simple/Sat/MSAT     | 337477 | 337592 | 227  |
| 1 | <a href="#">MSAT-2_AAe</a>    | Simple/Sat/MSAT     | 337751 | 337978 | 629  |
| 1 | <a href="#">MSAT-2_AAe</a>    | Simple/Sat/MSAT     | 337982 | 338135 | 349  |
| 1 | <a href="#">MSAT-2_AAe</a>    | Simple/Sat/MSAT     | 338145 | 338420 | 531  |
| 1 | <a href="#">MSAT-2_AAe</a>    | Simple/Sat/MSAT     | 373117 | 373375 | 422  |
| 1 | <a href="#">MSAT-2_AAe</a>    | Simple/Sat/MSAT     | 410118 | 410272 | 277  |
| 1 | <a href="#">MSAT-5_AAe</a>    | Simple/Sat/MSAT     | 373427 | 373615 | 263  |
| 1 | <a href="#">mTA_Ele42</a>     | DNA                 | 71051  | 71228  | 452  |
| 1 | <a href="#">mTA_Ele42</a>     | DNA                 | 89691  | 89798  | 356  |
| 1 | <a href="#">mTA_Ele42</a>     | DNA                 | 282541 | 282702 | 219  |
| 1 | <a href="#">mTA_Ele42</a>     | DNA                 | 293438 | 293481 | 236  |
| 1 | <a href="#">mTA_Ele42</a>     | DNA                 | 403687 | 403718 | 220  |
| 1 | <a href="#">mTA_Ele45</a>     | DNA                 | 368745 | 368906 | 644  |
| 1 | <a href="#">mTA_Ele45</a>     | DNA                 | 369038 | 369233 | 607  |

|   |                                  |                      |        |        |       |
|---|----------------------------------|----------------------|--------|--------|-------|
| 1 | <a href="#">MuDr-2_HM</a>        | DNA/MuDR             | 394040 | 394176 | 219   |
| 1 | <a href="#">MuDR-2_NV</a>        | DNA/MuDR             | 156785 | 156814 | 206   |
| 1 | <a href="#">MuDR-21_VV</a>       | DNA/MuDR             | 36749  | 36839  | 247   |
| 1 | <a href="#">MuDR3x_AP</a>        | DNA/MuDR             | 208330 | 208475 | 219   |
| 1 | <a href="#">MuDR-7_VV</a>        | DNA/MuDR             | 296300 | 296352 | 210   |
| 1 | <a href="#">MuDR-7_ZM</a>        | DNA/MuDR             | 209609 | 209692 | 218   |
| 1 | <a href="#">Ogre-MT4_LTR</a>     | LTR/Gypsy            | 181569 | 181604 | 219   |
| 1 | <a href="#">Ogre-PT3_LTR</a>     | LTR/Gypsy            | 174184 | 174261 | 226   |
| 1 | <a href="#">ORTE-1_AAe</a>       | NonLTR               | 44296  | 44508  | 567   |
| 1 | <a href="#">ORTE-1_AAe</a>       | NonLTR               | 246889 | 247300 | 527   |
| 1 | <a href="#">ORTE-1_AAe</a>       | NonLTR               | 419689 | 419746 | 251   |
| 4 | <a href="#">ORTE-1_AAe</a>       | NonLTR               | 4241   | 4298   | 257   |
| 5 | <a href="#">ORTE-1_AAe</a>       | NonLTR               | 31743  | 31855  | 318   |
| 5 | <a href="#">ORTE-1_AAe</a>       | NonLTR               | 32213  | 32326  | 325   |
| 1 | <a href="#">ORTE-2_AAe</a>       | NonLTR               | 382041 | 382131 | 277   |
| 1 | <a href="#">ORTE-4_AAe</a>       | NonLTR               | 28616  | 28673  | 230   |
| 1 | <a href="#">ORTE-6_AAe</a>       | NonLTR               | 267219 | 267320 | 755   |
| 5 | <a href="#">OSTE20</a>           | DNA                  | 11437  | 11545  | 209   |
| 1 | <a href="#">otherMITEs_Ele11</a> | DNA                  | 320860 | 321257 | 2750  |
| 1 | <a href="#">otherMITEs_Ele11</a> | DNA                  | 321261 | 321409 | 1157  |
| 6 | <a href="#">Outcast-17_AAe</a>   | NonLTR/Outcast       | 34160  | 34223  | 239   |
| 1 | <a href="#">P-1_AAe</a>          | DNA/P                | 27097  | 27272  | 675   |
| 1 | <a href="#">P-1_AAe</a>          | DNA/P                | 27312  | 27522  | 844   |
| 6 | <a href="#">P-1_CR</a>           | DNA/P                | 26815  | 26858  | 210   |
| 1 | <a href="#">P-27_HM</a>          | DNA/P                | 91951  | 92035  | 232   |
| 1 | <a href="#">P-4_AP</a>           | DNA/P                | 367132 | 367200 | 217   |
| 1 | <a href="#">PALTA1_CE</a>        | DNA                  | 230417 | 230476 | 212   |
| 1 | <a href="#">Penelope-2_AAe</a>   | NonLTR/Penelope      | 272639 | 272744 | 453   |
| 1 | <a href="#">Penelope-2_CQ</a>    | NonLTR/Penelope      | 66231  | 66319  | 274   |
| 1 | <a href="#">Penelope-3_AAe</a>   | NonLTR/Penelope      | 224056 | 224148 | 459   |
| 1 | <a href="#">Penelope-3_AAe</a>   | NonLTR/Penelope      | 224166 | 224276 | 717   |
| 1 | <a href="#">Penelope-3_AAe</a>   | NonLTR/Penelope      | 244647 | 244673 | 256   |
| 1 | <a href="#">Penelope-8_XT</a>    | NonLTR/Penelope      | 218758 | 218826 | 213   |
| 1 | <a href="#">piggyBac-N1_CQ</a>   | DNA/piggyBac         | 5519   | 5550   | 254   |
| 1 | <a href="#">PIVE</a>             | IntegratedVirus/DNAV | 389119 | 389155 | 203   |
| 1 | <a href="#">POLINTN1_SM</a>      | DNA/Polinton         | 66744  | 66803  | 220   |
| 1 | <a href="#">Polinton-1_EI</a>    | DNA/Polinton         | 419366 | 419480 | 219   |
| 6 | <a href="#">Polinton1_SM</a>     | DNA/Polinton         | 21784  | 21837  | 200   |
| 1 | <a href="#">Polinton-1_SM</a>    | DNA/Polinton         | 411580 | 411626 | 206   |
| 1 | <a href="#">Polinton-2_CB</a>    | DNA/Polinton         | 51216  | 51247  | 212   |
| 1 | <a href="#">Polinton-2_HM</a>    | DNA/Polinton         | 43111  | 43176  | 235   |
| 1 | <a href="#">Polinton-2_HM</a>    | DNA/Polinton         | 148217 | 148269 | 210   |
| 1 | <a href="#">Polinton-2_HM</a>    | DNA/Polinton         | 198604 | 198696 | 209   |
| 5 | <a href="#">Polinton-2_HM</a>    | DNA/Polinton         | 33325  | 33395  | 218   |
| 1 | <a href="#">Polinton-2A_NV</a>   | DNA/Polinton         | 62504  | 62543  | 235   |
| 1 | <a href="#">Polinton-3_HM</a>    | DNA/Polinton         | 318214 | 318304 | 204   |
| 5 | <a href="#">Polinton-5_NV</a>    | DNA/Polinton         | 1852   | 1894   | 260   |
| 4 | <a href="#">Polinton-9_NVi</a>   | DNA/Polinton         | 1500   | 1534   | 212   |
| 1 | <a href="#">PONY_AA</a>          | DNA                  | 39168  | 39679  | 3837  |
| 1 | <a href="#">PONY_AA</a>          | DNA                  | 112348 | 112856 | 3734  |
| 1 | <a href="#">PONY_AA</a>          | DNA                  | 195939 | 196439 | 2736  |
| 1 | <a href="#">PONY_AA</a>          | DNA                  | 353052 | 353559 | 3083  |
| 1 | <a href="#">PONY_AA</a>          | DNA                  | 395709 | 395874 | 852   |
| 1 | <a href="#">PONY_AA</a>          | DNA                  | 417203 | 417389 | 1279  |
| 1 | <a href="#">R1_Ele1</a>          | NonLTR/R1            | 137082 | 138647 | 13008 |
| 1 | <a href="#">R1_Ele1</a>          | NonLTR/R1            | 190751 | 195793 | 39877 |
| 1 | <a href="#">R1_Ele4</a>          | NonLTR/R1            | 321800 | 321869 | 287   |
| 2 | <a href="#">R1_Ele4</a>          | NonLTR/R1            | 8637   | 9105   | 2923  |
| 2 | <a href="#">R1_Ele4</a>          | NonLTR/R1            | 9111   | 9735   | 4396  |
| 5 | <a href="#">R1_Ele4</a>          | NonLTR/R1            | 22379  | 22674  | 1710  |
| 5 | <a href="#">R1_Ele4</a>          | NonLTR/R1            | 22677  | 24207  | 10156 |
| 1 | <a href="#">R1_Ele7</a>          | NonLTR/R1            | 322324 | 322683 | 2800  |
| 1 | <a href="#">R1_Ele7</a>          | NonLTR/R1            | 322744 | 323835 | 7846  |

|   |                                  |                     |        |        |      |
|---|----------------------------------|---------------------|--------|--------|------|
| 1 | <a href="#">R1_Ele7</a>          | NonLTR/R1           | 323874 | 324503 | 3820 |
| 1 | <a href="#">R1_Ele8</a>          | NonLTR/R1           | 45768  | 45854  | 289  |
| 1 | <a href="#">R1_Ele8</a>          | NonLTR/R1           | 287404 | 287512 | 367  |
| 1 | <a href="#">R1_Ele8</a>          | NonLTR/R1           | 321912 | 322322 | 2140 |
| 1 | <a href="#">R1_Ele8</a>          | NonLTR/R1           | 322684 | 322736 | 255  |
| 2 | <a href="#">R1_Ele8</a>          | NonLTR/R1           | 6254   | 6455   | 968  |
| 2 | <a href="#">R1_Ele8</a>          | NonLTR/R1           | 8431   | 8566   | 386  |
| 1 | <a href="#">R1_Ele9</a>          | NonLTR/R1           | 329454 | 329484 | 217  |
| 5 | <a href="#">R1_Ele9</a>          | NonLTR/R1           | 20849  | 21292  | 1173 |
| 5 | <a href="#">R1_Ele9</a>          | NonLTR/R1           | 21324  | 21404  | 316  |
| 5 | <a href="#">R1_Ele9</a>          | NonLTR/R1           | 21445  | 21631  | 426  |
| 5 | <a href="#">R1_Ele9</a>          | NonLTR/R1           | 21929  | 22190  | 791  |
| 5 | <a href="#">R1_Ele9</a>          | NonLTR/R1           | 22206  | 22377  | 592  |
| 1 | <a href="#">REP-3_CQ</a>         | Interspersed_Repeat | 148681 | 148851 | 971  |
| 1 | <a href="#">REP-3_CQ</a>         | Interspersed_Repeat | 221421 | 221589 | 721  |
| 1 | <a href="#">REP-3_CQ</a>         | Interspersed_Repeat | 222918 | 222999 | 402  |
| 1 | <a href="#">REP-3_CQ</a>         | Interspersed_Repeat | 223057 | 223192 | 765  |
| 1 | <a href="#">REP-3_CQ</a>         | Interspersed_Repeat | 223716 | 223877 | 467  |
| 1 | <a href="#">REP-3_CQ</a>         | Interspersed_Repeat | 260730 | 260891 | 500  |
| 1 | <a href="#">REP-3_CQ</a>         | Interspersed_Repeat | 261610 | 261768 | 1163 |
| 1 | <a href="#">REP-5_CQ</a>         | Interspersed_Repeat | 267852 | 267895 | 256  |
| 1 | <a href="#">REP-5_CQ</a>         | Interspersed_Repeat | 385370 | 385506 | 298  |
| 6 | <a href="#">RIRE2_I</a>          | LTR/Gypsy           | 15846  | 15902  | 233  |
| 1 | <a href="#">RTE_Ele2</a>         | NonLTR/RTE          | 132709 | 132740 | 236  |
| 1 | <a href="#">RTE_Ele2</a>         | NonLTR/RTE          | 321503 | 321635 | 393  |
| 2 | <a href="#">RTE_Ele2</a>         | NonLTR/RTE          | 523    | 1668   | 7004 |
| 2 | <a href="#">RTE_Ele2</a>         | NonLTR/RTE          | 4956   | 5048   | 545  |
| 2 | <a href="#">RTE_Ele2</a>         | NonLTR/RTE          | 5053   | 5523   | 2465 |
| 2 | <a href="#">RTE_Ele2</a>         | NonLTR/RTE          | 5549   | 5627   | 401  |
| 2 | <a href="#">RTE_Ele2</a>         | NonLTR/RTE          | 5810   | 5865   | 316  |
| 2 | <a href="#">RTE_Ele2</a>         | NonLTR/RTE          | 5896   | 6119   | 1619 |
| 2 | <a href="#">RTE_Ele2</a>         | NonLTR/RTE          | 6183   | 6242   | 436  |
| 1 | <a href="#">RTE_Ele2B_AAe</a>    | NonLTR/RTE          | 39999  | 40066  | 315  |
| 1 | <a href="#">RTE_Ele2B_AAe</a>    | NonLTR/RTE          | 237263 | 237389 | 476  |
| 1 | <a href="#">RTE_Ele2B_AAe</a>    | NonLTR/RTE          | 243408 | 243601 | 876  |
| 1 | <a href="#">RTE_Ele2B_AAe</a>    | NonLTR/RTE          | 320683 | 320849 | 571  |
| 4 | <a href="#">RTE_Ele2B_AAe</a>    | NonLTR/RTE          | 3105   | 3298   | 1532 |
| 4 | <a href="#">RTE_Ele2B_AAe</a>    | NonLTR/RTE          | 3299   | 3909   | 4682 |
| 4 | <a href="#">RTE_Ele2B_AAe</a>    | NonLTR/RTE          | 6962   | 7628   | 5441 |
| 1 | <a href="#">RTE_Ele2C_AAe</a>    | NonLTR/RTE          | 288750 | 288847 | 641  |
| 1 | <a href="#">RTE_Ele2C_AAe</a>    | NonLTR/RTE          | 288850 | 288919 | 518  |
| 1 | <a href="#">RTE_Ele2C_AAe</a>    | NonLTR/RTE          | 288923 | 289296 | 2361 |
| 1 | <a href="#">RTE_Ele4</a>         | NonLTR/RTE          | 417135 | 417186 | 247  |
| 1 | <a href="#">RTE_Ele4</a>         | NonLTR/RTE          | 417397 | 417538 | 485  |
| 1 | <a href="#">RTE_Ele5</a>         | NonLTR/RTE          | 34389  | 34448  | 421  |
| 1 | <a href="#">RTE_Ele5</a>         | NonLTR/RTE          | 38997  | 39141  | 615  |
| 4 | <a href="#">RTE_Ele5</a>         | NonLTR/RTE          | 8069   | 8173   | 285  |
| 1 | <a href="#">SAT-1_AAe</a>        | Simple/Sat/SAT      | 20109  | 20261  | 897  |
| 1 | <a href="#">SAT-1_AAe</a>        | Simple/Sat/SAT      | 20262  | 20312  | 351  |
| 1 | <a href="#">SAT-1_AAe</a>        | Simple/Sat/SAT      | 135969 | 136015 | 261  |
| 1 | <a href="#">SAT-1_AAe</a>        | Simple/Sat/SAT      | 176618 | 176772 | 802  |
| 1 | <a href="#">SAT-1_AAe</a>        | Simple/Sat/SAT      | 281741 | 281893 | 1112 |
| 1 | <a href="#">SAT-1_AAe</a>        | Simple/Sat/SAT      | 281894 | 282006 | 695  |
| 1 | <a href="#">SAT-1_AAe</a>        | Simple/Sat/SAT      | 404333 | 404442 | 256  |
| 5 | <a href="#">SAT-1_AAe</a>        | Simple/Sat/SAT      | 16960  | 17047  | 386  |
| 1 | <a href="#">Shinagawa-1_AAe</a>  | DNA                 | 325402 | 325479 | 327  |
| 6 | <a href="#">Shinagawa-1_AAe</a>  | DNA                 | 18138  | 18178  | 303  |
| 1 | <a href="#">Shinagawa-10_AAe</a> | DNA                 | 319834 | 319873 | 245  |
| 1 | <a href="#">Shinagawa-10_AAe</a> | DNA                 | 418711 | 418814 | 331  |
| 1 | <a href="#">Shinagawa-11_AAe</a> | DNA                 | 853    | 888    | 240  |
| 1 | <a href="#">Shinagawa-11_AAe</a> | DNA                 | 12761  | 12849  | 434  |
| 1 | <a href="#">Shinagawa-11_AAe</a> | DNA                 | 90298  | 90375  | 222  |
| 1 | <a href="#">Shinagawa-11_AAe</a> | DNA                 | 174604 | 174701 | 373  |

|   |                                  |                   |        |        |      |
|---|----------------------------------|-------------------|--------|--------|------|
| 1 | <a href="#">Shinagawa-11 AAe</a> | DNA               | 219092 | 219160 | 234  |
| 1 | <a href="#">Shinagawa-11 AAe</a> | DNA               | 351217 | 351281 | 300  |
| 1 | <a href="#">Shinagawa-11 AAe</a> | DNA               | 384431 | 384499 | 234  |
| 1 | <a href="#">Shinagawa-11 AAe</a> | DNA               | 414648 | 414999 | 1249 |
| 5 | <a href="#">Shinagawa-11 AAe</a> | DNA               | 14790  | 14865  | 499  |
| 5 | <a href="#">Shinagawa-11 AAe</a> | DNA               | 16030  | 16122  | 645  |
| 1 | <a href="#">Shinagawa-2 AAe</a>  | DNA               | 384701 | 384759 | 284  |
| 1 | <a href="#">Shinagawa-2 AAe</a>  | DNA               | 421462 | 421495 | 229  |
| 1 | <a href="#">Shinagawa-2 CQ</a>   | DNA               | 277626 | 277666 | 258  |
| 1 | <a href="#">Shinagawa-2 CQ</a>   | DNA               | 278808 | 278878 | 289  |
| 1 | <a href="#">Shinagawa-4 AAe</a>  | DNA               | 112235 | 112317 | 279  |
| 1 | <a href="#">Shinagawa-4 AAe</a>  | DNA               | 267056 | 267122 | 290  |
| 1 | <a href="#">Shinagawa-4 AAe</a>  | DNA               | 297951 | 298138 | 711  |
| 1 | <a href="#">Shinagawa-4 AAe</a>  | DNA               | 313657 | 313737 | 263  |
| 1 | <a href="#">Shinagawa-4 AAe</a>  | DNA               | 329499 | 329692 | 1241 |
| 6 | <a href="#">Shinagawa-4 AAe</a>  | DNA               | 10143  | 10350  | 749  |
| 1 | <a href="#">Shinagawa-6 AAe</a>  | DNA               | 53046  | 53117  | 281  |
| 1 | <a href="#">Shinagawa-6 AAe</a>  | DNA               | 81155  | 81251  | 560  |
| 1 | <a href="#">Shinagawa-6 AAe</a>  | DNA               | 223537 | 223679 | 829  |
| 1 | <a href="#">Shinagawa-6 AAe</a>  | DNA               | 260933 | 261081 | 822  |
| 1 | <a href="#">Shinagawa-6 AAe</a>  | DNA               | 285335 | 285397 | 317  |
| 1 | <a href="#">Shinagawa-6 AAe</a>  | DNA               | 304466 | 304634 | 991  |
| 1 | <a href="#">Shinagawa-6 AAe</a>  | DNA               | 421503 | 421601 | 368  |
| 5 | <a href="#">Shinagawa-6 AAe</a>  | DNA               | 13720  | 13877  | 680  |
| 6 | <a href="#">Shinagawa-6 AAe</a>  | DNA               | 11722  | 11889  | 1012 |
| 1 | <a href="#">Shinagawa-7 AAe</a>  | DNA               | 350459 | 350601 | 568  |
| 1 | <a href="#">Shinagawa-8 AAe</a>  | DNA               | 2838   | 3027   | 630  |
| 1 | <a href="#">Shinagawa-8 AAe</a>  | DNA               | 132225 | 132310 | 376  |
| 1 | <a href="#">Shinagawa-8 AAe</a>  | DNA               | 173506 | 173671 | 365  |
| 1 | <a href="#">Shinagawa-8 AAe</a>  | DNA               | 274351 | 274553 | 844  |
| 1 | <a href="#">Shinagawa-8 AAe</a>  | DNA               | 279048 | 279093 | 218  |
| 1 | <a href="#">Shinagawa-9 AAe</a>  | DNA               | 25022  | 25101  | 401  |
| 1 | <a href="#">Shinagawa-9 AAe</a>  | DNA               | 25680  | 25818  | 533  |
| 1 | <a href="#">Shinagawa-9 AAe</a>  | DNA               | 26193  | 26261  | 450  |
| 1 | <a href="#">Shinagawa-9 AAe</a>  | DNA               | 245270 | 245391 | 388  |
| 1 | <a href="#">Shinagawa-9 AAe</a>  | DNA               | 278592 | 278637 | 215  |
| 6 | <a href="#">Shinagawa-9 AAe</a>  | DNA               | 8068   | 8216   | 561  |
| 6 | <a href="#">Shinagawa-9 AAe</a>  | DNA               | 9424   | 9571   | 943  |
| 6 | <a href="#">Shinagawa-9 AAe</a>  | DNA               | 9795   | 9983   | 995  |
| 1 | <a href="#">SINE2-1 AP</a>       | NonLTR/SINE/SINE2 | 393271 | 393334 | 204  |
| 1 | <a href="#">SINE-4 CQ</a>        | NonLTR/SINE       | 14263  | 14337  | 288  |
| 1 | <a href="#">SINE-4 CQ</a>        | NonLTR/SINE       | 71522  | 71579  | 298  |
| 5 | <a href="#">SMAR4</a>            | DNA/Mariner       | 31369  | 31396  | 208  |
| 6 | <a href="#">Sola1-3 AA</a>       | DNA/Sola          | 18185  | 18308  | 503  |
| 1 | <a href="#">Sola1-4 AA</a>       | DNA/Sola          | 92602  | 92852  | 870  |
| 1 | <a href="#">Sola1-4 AA</a>       | DNA/Sola          | 149276 | 149527 | 877  |
| 1 | <a href="#">Sola1-4 AA</a>       | DNA/Sola          | 185139 | 185371 | 727  |
| 1 | <a href="#">Sola1-4 AA</a>       | DNA/Sola          | 226704 | 226757 | 321  |
| 1 | <a href="#">Sola1-4 AA</a>       | DNA/Sola          | 344716 | 344791 | 381  |
| 1 | <a href="#">Sola1-4 AA</a>       | DNA/Sola          | 344826 | 344895 | 281  |
| 1 | <a href="#">Sola1-4 AA</a>       | DNA/Sola          | 345074 | 345125 | 345  |
| 1 | <a href="#">Sola1-4 AA</a>       | DNA/Sola          | 353668 | 353926 | 1921 |
| 5 | <a href="#">Sola1-4 AA</a>       | DNA/Sola          | 5791   | 6001   | 958  |
| 1 | <a href="#">Sola1-N1 AAe</a>     | DNA/Sola          | 299822 | 299997 | 634  |
| 1 | <a href="#">Sola1-N1 AAe</a>     | DNA/Sola          | 300038 | 300081 | 262  |
| 1 | <a href="#">Sola1-N1 AAe</a>     | DNA/Sola          | 300380 | 300456 | 350  |
| 5 | <a href="#">Sola1-N1 CQ</a>      | DNA/Sola          | 30795  | 30860  | 203  |
| 1 | <a href="#">Sola1-N5 AAe</a>     | DNA/Sola          | 140935 | 140984 | 303  |
| 1 | <a href="#">Sola1-N5 AAe</a>     | DNA/Sola          | 400033 | 400206 | 375  |
| 1 | <a href="#">Sola1-N5 AAe</a>     | DNA/Sola          | 405314 | 405380 | 293  |
| 5 | <a href="#">Sola1-N5 AAe</a>     | DNA/Sola          | 28317  | 28510  | 1091 |
| 1 | <a href="#">Sola2-2 AAe</a>      | DNA/Sola          | 24246  | 24619  | 1222 |
| 1 | <a href="#">Sola2-3N1 SP</a>     | DNA/Sola          | 258358 | 258419 | 224  |

|   |                                |                     |        |        |      |
|---|--------------------------------|---------------------|--------|--------|------|
| 1 | <a href="#">Sola2-N1 AAe</a>   | DNA/Sola            | 150044 | 150224 | 913  |
| 1 | <a href="#">Sola2-N1 AAe</a>   | DNA/Sola            | 169704 | 169993 | 2148 |
| 1 | <a href="#">Sola2-N1 AAe</a>   | DNA/Sola            | 169994 | 170121 | 1097 |
| 1 | <a href="#">Sola2-N1 AAe</a>   | DNA/Sola            | 382659 | 382700 | 201  |
| 1 | <a href="#">Sola2-N4 AAe</a>   | DNA/Sola            | 37229  | 37281  | 249  |
| 1 | <a href="#">Sola2-N4 AAe</a>   | DNA/Sola            | 100395 | 101267 | 7118 |
| 1 | <a href="#">Sola2-N4 AAe</a>   | DNA/Sola            | 101268 | 101299 | 236  |
| 1 | <a href="#">Sola2-N4 AAe</a>   | DNA/Sola            | 101325 | 102019 | 5738 |
| 5 | <a href="#">Sola2-N4 AAe</a>   | DNA/Sola            | 42399  | 42545  | 421  |
| 5 | <a href="#">Sola2-N4 AAe</a>   | DNA/Sola            | 42731  | 42895  | 840  |
| 6 | <a href="#">Sola2-N4 AAe</a>   | DNA/Sola            | 13068  | 13202  | 474  |
| 6 | <a href="#">Sola2-N4 AAe</a>   | DNA/Sola            | 32065  | 32176  | 326  |
| 1 | <a href="#">Sola3-1 AA</a>     | DNA/Sola            | 144165 | 144431 | 1397 |
| 1 | <a href="#">Sola3-1 AA</a>     | DNA/Sola            | 412174 | 412437 | 1250 |
| 5 | <a href="#">Sola3-1 AA</a>     | DNA/Sola            | 33573  | 33839  | 2107 |
| 1 | <a href="#">Sola3-1N1 AA</a>   | DNA/Sola            | 10585  | 10655  | 421  |
| 1 | <a href="#">Sola3-1N1 AA</a>   | DNA/Sola            | 12447  | 12712  | 1342 |
| 1 | <a href="#">Sola3-1N1 AA</a>   | DNA/Sola            | 43427  | 43714  | 1707 |
| 1 | <a href="#">Sola3-1N1 AA</a>   | DNA/Sola            | 88644  | 88705  | 287  |
| 1 | <a href="#">Sola3-1N1 AA</a>   | DNA/Sola            | 88706  | 88880  | 882  |
| 1 | <a href="#">Sola3-1N1 AA</a>   | DNA/Sola            | 110639 | 110779 | 656  |
| 1 | <a href="#">Sola3-1N1 AA</a>   | DNA/Sola            | 132363 | 132664 | 2057 |
| 1 | <a href="#">Sola3-1N1 AA</a>   | DNA/Sola            | 179243 | 179294 | 208  |
| 1 | <a href="#">Sola3-1N1 AA</a>   | DNA/Sola            | 203562 | 203611 | 262  |
| 1 | <a href="#">Sola3-1N1 AA</a>   | DNA/Sola            | 205357 | 205475 | 298  |
| 1 | <a href="#">Sola3-1N1 AA</a>   | DNA/Sola            | 215444 | 215725 | 2054 |
| 1 | <a href="#">Sola3-1N1 AA</a>   | DNA/Sola            | 235611 | 235669 | 277  |
| 1 | <a href="#">Sola3-1N1 AA</a>   | DNA/Sola            | 259566 | 259720 | 304  |
| 1 | <a href="#">Sola3-1N1 AA</a>   | DNA/Sola            | 259931 | 260008 | 424  |
| 1 | <a href="#">Sola3-1N1 AA</a>   | DNA/Sola            | 262221 | 262495 | 1352 |
| 1 | <a href="#">Sola3-1N1 AA</a>   | DNA/Sola            | 286841 | 287117 | 2072 |
| 1 | <a href="#">Sola3-1N1 AA</a>   | DNA/Sola            | 294436 | 294512 | 246  |
| 1 | <a href="#">Sola3-1N1 AA</a>   | DNA/Sola            | 358080 | 358384 | 2036 |
| 1 | <a href="#">Sola3-1N1 AA</a>   | DNA/Sola            | 375166 | 375215 | 274  |
| 4 | <a href="#">Sola3-1N1 AA</a>   | DNA/Sola            | 4523   | 4705   | 1254 |
| 6 | <a href="#">Sola3-1N1 AA</a>   | DNA/Sola            | 5635   | 5916   | 2282 |
| 1 | <a href="#">TC1A</a>           | DNA/Mariner         | 339116 | 339212 | 242  |
| 1 | <a href="#">TCN760</a>         | Interspersed_Repeat | 46300  | 46406  | 286  |
| 1 | <a href="#">TDD4</a>           | DNA/Ginger2         | 5934   | 6117   | 225  |
| 1 | <a href="#">TNR1</a>           | DNA                 | 282474 | 282508 | 211  |
| 1 | <a href="#">Transib1 AA</a>    | DNA/Transib         | 184250 | 184320 | 486  |
| 1 | <a href="#">Transib1 AA</a>    | DNA/Transib         | 382994 | 383079 | 217  |
| 6 | <a href="#">Transib1 AA</a>    | DNA/Transib         | 3653   | 3705   | 242  |
| 1 | <a href="#">Transib3 AA</a>    | DNA/Transib         | 44556  | 44667  | 375  |
| 1 | <a href="#">Transib3 AA</a>    | DNA/Transib         | 247395 | 247455 | 282  |
| 4 | <a href="#">Transib3 AA</a>    | DNA/Transib         | 3917   | 4031   | 355  |
| 1 | <a href="#">Transib-6 AAe</a>  | DNA/Transib         | 124500 | 124592 | 291  |
| 1 | <a href="#">Transib-6 AAe</a>  | DNA/Transib         | 124641 | 125177 | 1178 |
| 1 | <a href="#">Transib-6 AAe</a>  | DNA/Transib         | 148374 | 148486 | 468  |
| 1 | <a href="#">Transib-6 AAe</a>  | DNA/Transib         | 148852 | 148942 | 520  |
| 1 | <a href="#">Transib-6 AAe</a>  | DNA/Transib         | 149017 | 149141 | 510  |
| 1 | <a href="#">Transib-6 AAe</a>  | DNA/Transib         | 149640 | 149673 | 201  |
| 1 | <a href="#">Transib-6 AAe</a>  | DNA/Transib         | 181193 | 181308 | 241  |
| 1 | <a href="#">Transib-6 AAe</a>  | DNA/Transib         | 183185 | 183551 | 1335 |
| 1 | <a href="#">Transib-6 AAe</a>  | DNA/Transib         | 269605 | 269722 | 375  |
| 1 | <a href="#">Transib-6 AAe</a>  | DNA/Transib         | 271072 | 271470 | 1125 |
| 1 | <a href="#">Transib-6 AAe</a>  | DNA/Transib         | 283506 | 284137 | 3715 |
| 1 | <a href="#">Transib-6 AAe</a>  | DNA/Transib         | 284188 | 284347 | 584  |
| 1 | <a href="#">Transib-6 AAe</a>  | DNA/Transib         | 285050 | 285334 | 1100 |
| 1 | <a href="#">Transib-6 AAe</a>  | DNA/Transib         | 285483 | 286175 | 3686 |
| 1 | <a href="#">Transib-N1 AAe</a> | DNA/Transib         | 181677 | 181738 | 241  |
| 1 | <a href="#">Transib-N1 AAe</a> | DNA/Transib         | 383146 | 383210 | 237  |
| 1 | <a href="#">Transib-N1 CQ</a>  | DNA/Transib         | 31467  | 31621  | 460  |

|   |                                 |               |        |        |      |
|---|---------------------------------|---------------|--------|--------|------|
| 1 | <a href="#">Transib-N1_CQ</a>   | DNA/Transib   | 36383  | 36537  | 471  |
| 1 | <a href="#">TransibN2_AG</a>    | DNA/Transib   | 32935  | 33000  | 217  |
| 1 | <a href="#">Transib-N3_A Ae</a> | DNA/Transib   | 159458 | 159693 | 305  |
| 1 | <a href="#">Transib-N3_A Ae</a> | DNA/Transib   | 180156 | 180377 | 535  |
| 5 | <a href="#">Transib-N3_A Ae</a> | DNA/Transib   | 42224  | 42331  | 222  |
| 1 | <a href="#">TransibN3_AG</a>    | DNA/Transib   | 230085 | 230181 | 209  |
| 5 | <a href="#">TRUNCATOR2_LTR</a>  | LTR           | 32085  | 32192  | 328  |
| 1 | <a href="#">TWIN</a>            | NonLTR/SINE   | 96748  | 96805  | 323  |
| 1 | <a href="#">Tx1-3_CQ</a>        | NonLTR/Tx1    | 219493 | 219565 | 217  |
| 1 | <a href="#">VHARB4_VV</a>       | DNA/Harbinger | 52782  | 52821  | 231  |
| 1 | <a href="#">VHARB4_VV</a>       | DNA/Harbinger | 272763 | 272899 | 254  |
| 1 | <a href="#">Waldo-1_A Ae</a>    | NonLTR/R1     | 77448  | 77555  | 319  |
| 1 | <a href="#">Waldo-2_A Ae</a>    | NonLTR/R1     | 16768  | 16806  | 241  |
| 1 | <a href="#">Waldo-2_A Ae</a>    | NonLTR/R1     | 23973  | 24119  | 438  |
| 1 | <a href="#">Waldo-2_A Ae</a>    | NonLTR/R1     | 76910  | 77141  | 823  |
| 1 | <a href="#">Waldo-2_A Ae</a>    | NonLTR/R1     | 77702  | 77796  | 434  |
| 1 | <a href="#">Waldo-2_A Ae</a>    | NonLTR/R1     | 78003  | 78611  | 2417 |
| 1 | <a href="#">Waldo-2_A Ae</a>    | NonLTR/R1     | 78627  | 78941  | 1683 |
| 1 | <a href="#">Waldo-2_A Ae</a>    | NonLTR/R1     | 79224  | 79363  | 586  |
| 1 | <a href="#">Waldo-2_A Ae</a>    | NonLTR/R1     | 79686  | 79829  | 746  |
| 1 | <a href="#">Waldo-2_A Ae</a>    | NonLTR/R1     | 80362  | 80866  | 2057 |
| 1 | <a href="#">Waldo-2_A Ae</a>    | NonLTR/R1     | 81423  | 81580  | 656  |
| 1 | <a href="#">Waldo-2_A Ae</a>    | NonLTR/R1     | 99024  | 99120  | 344  |
| 1 | <a href="#">Waldo-2_A Ae</a>    | NonLTR/R1     | 107791 | 107842 | 423  |
| 1 | <a href="#">Waldo-2_A Ae</a>    | NonLTR/R1     | 107893 | 108039 | 585  |
| 1 | <a href="#">Waldo-2_A Ae</a>    | NonLTR/R1     | 201848 | 202061 | 1519 |
| 1 | <a href="#">Waldo-2_A Ae</a>    | NonLTR/R1     | 248103 | 248200 | 440  |
| 1 | <a href="#">Waldo-2_A Ae</a>    | NonLTR/R1     | 324857 | 325249 | 1856 |
| 1 | <a href="#">Waldo-2_A Ae</a>    | NonLTR/R1     | 329190 | 329251 | 507  |
| 1 | <a href="#">Waldo-2_A Ae</a>    | NonLTR/R1     | 329252 | 329453 | 1062 |
| 1 | <a href="#">Waldo-2_A Ae</a>    | NonLTR/R1     | 343847 | 344051 | 1201 |
| 1 | <a href="#">Waldo-2_A Ae</a>    | NonLTR/R1     | 391333 | 391433 | 619  |
| 2 | <a href="#">Waldo-2_A Ae</a>    | NonLTR/R1     | 6665   | 6728   | 254  |
| 1 | <a href="#">Waldo-3_A Ae</a>    | NonLTR/R1     | 41779  | 41867  | 291  |
| 1 | <a href="#">Waldo-3_A Ae</a>    | NonLTR/R1     | 136393 | 136539 | 1005 |
| 1 | <a href="#">Waldo-3_A Ae</a>    | NonLTR/R1     | 136540 | 136686 | 795  |
| 1 | <a href="#">Waldo-3_A Ae</a>    | NonLTR/R1     | 136866 | 137049 | 1343 |
| 1 | <a href="#">Waldo-3_A Ae</a>    | NonLTR/R1     | 138657 | 138829 | 1006 |
| 1 | <a href="#">Waldo-3_A Ae</a>    | NonLTR/R1     | 138833 | 138875 | 311  |
| 1 | <a href="#">Waldo-3_A Ae</a>    | NonLTR/R1     | 138876 | 139230 | 2629 |
| 1 | <a href="#">Waldo-3_A Ae</a>    | NonLTR/R1     | 139232 | 139484 | 2017 |
| 1 | <a href="#">Waldo-3_A Ae</a>    | NonLTR/R1     | 139485 | 140283 | 6192 |
| 1 | <a href="#">Waldo-3_A Ae</a>    | NonLTR/R1     | 280877 | 281025 | 761  |
| 1 | <a href="#">Waldo-3_A Ae</a>    | NonLTR/R1     | 281026 | 281251 | 471  |
| 1 | <a href="#">Waldo-3_A Ae</a>    | NonLTR/R1     | 283174 | 283312 | 562  |
| 1 | <a href="#">Waldo-3_A Ae</a>    | NonLTR/R1     | 283316 | 283505 | 738  |
| 1 | <a href="#">Waldo-3_A Ae</a>    | NonLTR/R1     | 286205 | 286451 | 1103 |
| 1 | <a href="#">Waldo-3_A Ae</a>    | NonLTR/R1     | 286456 | 286769 | 1239 |
| 1 | <a href="#">Waldo-3_A Ae</a>    | NonLTR/R1     | 289365 | 289571 | 550  |
| 1 | <a href="#">Waldo-3_A Ae</a>    | NonLTR/R1     | 329693 | 330013 | 2055 |
| 1 | <a href="#">Waldo-3_A Ae</a>    | NonLTR/R1     | 330015 | 330150 | 983  |
| 1 | <a href="#">Waldo-3_A Ae</a>    | NonLTR/R1     | 330154 | 331074 | 5920 |
| 1 | <a href="#">Waldo-3_A Ae</a>    | NonLTR/R1     | 331083 | 331547 | 3138 |
| 1 | <a href="#">Waldo-3_A Ae</a>    | NonLTR/R1     | 331548 | 331706 | 1047 |
| 1 | <a href="#">Waldo-4_A Ae</a>    | NonLTR/R1     | 40217  | 40417  | 517  |
| 1 | <a href="#">Waldo-4_A Ae</a>    | NonLTR/R1     | 164564 | 165186 | 3194 |
| 1 | <a href="#">Waldo-4_A Ae</a>    | NonLTR/R1     | 165187 | 166279 | 6974 |
| 1 | <a href="#">Waldo-4_A Ae</a>    | NonLTR/R1     | 166281 | 166386 | 545  |
| 1 | <a href="#">Waldo-4_A Ae</a>    | NonLTR/R1     | 166387 | 166851 | 3057 |
| 1 | <a href="#">Waldo-4_A Ae</a>    | NonLTR/R1     | 287210 | 287293 | 365  |
| 1 | <a href="#">Waldo-4_A Ae</a>    | NonLTR/R1     | 290929 | 291198 | 2018 |
| 1 | <a href="#">Waldo-4_A Ae</a>    | NonLTR/R1     | 291199 | 291294 | 452  |
| 2 | <a href="#">Waldo-4_A Ae</a>    | NonLTR/R1     | 316    | 380    | 300  |



|   |                              |           |        |        |      |
|---|------------------------------|-----------|--------|--------|------|
| 2 | <a href="#">Waldo-4 AAe</a>  | NonLTR/R1 | 6461   | 6577   | 331  |
| 2 | <a href="#">Waldo-4 AAe</a>  | NonLTR/R1 | 6803   | 7017   | 1274 |
| 2 | <a href="#">Waldo-4 AAe</a>  | NonLTR/R1 | 7076   | 7772   | 3225 |
| 2 | <a href="#">Waldo-4 AAe</a>  | NonLTR/R1 | 7829   | 8378   | 2922 |
| 1 | <a href="#">Waldo-6 AAe</a>  | NonLTR/R1 | 289641 | 290054 | 2413 |
| 1 | <a href="#">Waldo-6 AAe</a>  | NonLTR/R1 | 290065 | 290716 | 3982 |
| 1 | <a href="#">Waldo-6 AAe</a>  | NonLTR/R1 | 290717 | 290928 | 1314 |
| 1 | <a href="#">Waldo-6 AAe</a>  | NonLTR/R1 | 291300 | 291452 | 823  |
| 1 | <a href="#">Waldo-6 AAe</a>  | NonLTR/R1 | 291461 | 291663 | 1454 |
| 1 | <a href="#">Waldo-6 AAe</a>  | NonLTR/R1 | 291678 | 292276 | 3529 |
| 1 | <a href="#">WUJIN</a>        | DNA       | 141006 | 141074 | 393  |
| 1 | <a href="#">WUJIN</a>        | DNA       | 162053 | 162099 | 294  |
| 1 | <a href="#">WUJIN</a>        | DNA       | 349130 | 349318 | 1358 |
| 1 | <a href="#">WUJIN</a>        | DNA       | 406487 | 406600 | 721  |
| 1 | <a href="#">Zator-1 AA</a>   | DNA/Zator | 173369 | 173473 | 615  |
| 1 | <a href="#">Zator-1 AA</a>   | DNA/Zator | 175560 | 175800 | 1055 |
| 1 | <a href="#">Zator-1 AA</a>   | DNA/Zator | 327766 | 327899 | 745  |
| 1 | <a href="#">Zator-1 AA</a>   | DNA/Zator | 328058 | 328201 | 664  |
| 5 | <a href="#">Zator-1 AA</a>   | DNA/Zator | 31269  | 31365  | 368  |
| 1 | <a href="#">Zator-1 CP</a>   | DNA/Zator | 152774 | 153019 | 536  |
| 1 | <a href="#">Zator-1 CP</a>   | DNA/Zator | 154095 | 154143 | 398  |
| 1 | <a href="#">Zator-1 CP</a>   | DNA/Zator | 176202 | 176366 | 421  |
| 1 | <a href="#">Zator-1 CP</a>   | DNA/Zator | 195806 | 195895 | 353  |
| 1 | <a href="#">Zator-1 CP</a>   | DNA/Zator | 244677 | 244713 | 243  |
| 1 | <a href="#">Zator-1 CP</a>   | DNA/Zator | 247459 | 247579 | 378  |
| 1 | <a href="#">Zator-1 CP</a>   | DNA/Zator | 390106 | 390295 | 447  |
| 1 | <a href="#">Zator-N1 AAe</a> | DNA/Zator | 190334 | 190491 | 541  |
| 1 | <a href="#">Zator-N1 AAe</a> | DNA/Zator | 384117 | 384280 | 1257 |
| 1 | <a href="#">ZEBEDEE</a>      | LTR/Copia | 10940  | 11211  | 1139 |
| 1 | <a href="#">ZEBEDEE</a>      | LTR/Copia | 107207 | 107448 | 1645 |
