# Supplementary material for: The Orthologue of the Fruitfly Sex Behaviour Gene Fruitless in the Mosquito Aedes aegypti: Evolution of Genomic Organisation and Alternative Splicing
Source: PubMed Central journal article supplement (PMC3572092; doi:10.1371/journal.pone.0048554), 2013-02-13
Supplement: pone.0048554.s009.pdf [file pone.0048554.s009.pdf]

**Table S2 – *Ae. aegypti* intron analysis**

| Average NoRE/kb |               | 2,19               | dS                         |                                    | 0,68    | Average RE bp |  | 47,22 | dS |  | 17,75 |
|-----------------|---------------|--------------------|----------------------------|------------------------------------|---------|---------------|--|-------|----|--|-------|
| Gene ID         | Intron number | Intron lenght (bp) | Number of Repeated Element | Total Repeated Element lenght (bp) | NoRE/kb | RE bp (%)     |  |       |    |  |       |
| AAEL000001      | 2-3           | 5548               | 16                         | 2462                               | 2,88    | 44,38         |  |       |    |  |       |
| AAEL000020      | 1-2           | 2738               | 9                          | 622                                | 3,29    | 22,72         |  |       |    |  |       |
| AAEL000020      | 2-3           | 1054               | 3                          | 451                                | 2,85    | 42,79         |  |       |    |  |       |
| AAEL000034      | 2-3           | 1627               | 4                          | 560                                | 2,46    | 34,42         |  |       |    |  |       |
| AAEL000060      | 3-4           | 14033              | 24                         | 8486                               | 1,71    | 60,47         |  |       |    |  |       |
| AAEL000060      | 5-6           | 4007               | 9                          | 1481                               | 2,25    | 36,96         |  |       |    |  |       |
| AAEL000070      | 4-5           | 3106               | 6                          | 938                                | 1,93    | 30,20         |  |       |    |  |       |
| AAEL000095      | 1-2           | 6986               | 4                          | 477                                | 0,57    | 6,83          |  |       |    |  |       |
| AAEL000121      | 2-3           | 13070              | 15                         | 9367                               | 1,15    | 71,67         |  |       |    |  |       |
| AAEL000121      | 5-6           | 10950              | 18                         | 6929                               | 1,64    | 63,28         |  |       |    |  |       |
| AAEL000148      | 2-3           | 2479               | 8                          | 873                                | 3,23    | 35,22         |  |       |    |  |       |
| AAEL000159      | 2-3           | 15316              | 31                         | 4995                               | 2,02    | 32,61         |  |       |    |  |       |
| AAEL000160      | 1-2           | 15229              | 28                         | 7527                               | 1,84    | 49,43         |  |       |    |  |       |
| AAEL000174      | 2-3           | 14525              | 37                         | 7568                               | 2,55    | 52,10         |  |       |    |  |       |
| AAEL000195      | 3-4           | 20088              | 42                         | 7827                               | 2,09    | 38,96         |  |       |    |  |       |
| AAEL000201      | 1-2           | 1487               | 5                          | 528                                | 3,36    | 35,51         |  |       |    |  |       |
| AAEL000201      | 3-4           | 4097               | 6                          | 3142                               | 1,46    | 76,69         |  |       |    |  |       |
| AAEL000215      | 2-3           | 2953               | 9                          | 997                                | 3,05    | 33,76         |  |       |    |  |       |
| AAEL000221      | 2-3           | 8236               | 23                         | 3664                               | 2,79    | 44,49         |  |       |    |  |       |
| AAEL000247      | 1-2           | 12692              | 27                         | 5525                               | 2,13    | 43,53         |  |       |    |  |       |
| AAEL000254      | 2-3           | 29429              | 53                         | 17630                              | 1,80    | 59,91         |  |       |    |  |       |
| AAEL000261      | 1-2           | 7397               | 8                          | 3770                               | 1,08    | 50,97         |  |       |    |  |       |
| AAEL000283      | 1-2           | 4573               | 13                         | 2793                               | 2,84    | 61,08         |  |       |    |  |       |
| AAEL000300      | 1-2           | 1288               | 4                          | 332                                | 3,11    | 25,78         |  |       |    |  |       |
| AAEL000310      | 1-2           | 10424              | 21                         | 5949                               | 2,01    | 57,07         |  |       |    |  |       |
| AAEL000325      | 3-4           | 14023              | 30                         | 6231                               | 2,14    | 44,43         |  |       |    |  |       |
| AAEL000349      | 1-2           | 13312              | 24                         | 6029                               | 1,80    | 45,29         |  |       |    |  |       |
| AAEL000376      | 1-2           | 3244               | 6                          | 1067                               | 1,85    | 32,89         |  |       |    |  |       |
| AAEL000397      | 1-2           | 6513               | 14                         | 3540                               | 2,15    | 54,35         |  |       |    |  |       |
| AAEL000402      | 5-6           | 7300               | 20                         | 2504                               | 2,74    | 34,30         |  |       |    |  |       |
| AAEL000405      | 1-2           | 1617               | 2                          | 216                                | 1,24    | 13,36         |  |       |    |  |       |
| AAEL000405      | 4-5           | 10507              | 24                         | 3895                               | 2,28    | 37,07         |  |       |    |  |       |
| AAEL000426      | 3-4           | 15717              | 32                         | 10833                              | 2,04    | 68,93         |  |       |    |  |       |
| AAEL000444      | 1-2           | 20117              | 37                         | 13421                              | 1,84    | 66,71         |  |       |    |  |       |
| AAEL000469      | 2-3           | 36765              | 67                         | 19179                              | 1,82    | 52,17         |  |       |    |  |       |
| AAEL000487      | 1-2           | 1156               | 2                          | 532                                | 1,73    | 46,02         |  |       |    |  |       |
| AAEL000498      | 1-2           | 9797               | 10                         | 5373                               | 1,02    | 54,84         |  |       |    |  |       |
| AAEL000509      | 2-3           | 5213               | 13                         | 1550                               | 2,49    | 29,73         |  |       |    |  |       |
| AAEL000509      | 4-5           | 6848               | 15                         | 1335                               | 2,19    | 19,49         |  |       |    |  |       |
| AAEL000536      | 2-3           | 38643              | 90                         | 20661                              | 2,33    | 53,47         |  |       |    |  |       |
| AAEL000536      | 5-6           | 23557              | 64                         | 8978                               | 2,72    | 38,11         |  |       |    |  |       |
| AAEL000540      | 1-2           | 5250               | 9                          | 2427                               | 1,71    | 46,23         |  |       |    |  |       |
| AAEL000555      | 1-2           | 14153              | 45                         | 7395                               | 3,18    | 52,25         |  |       |    |  |       |
| AAEL000567      | 1-2           | 3922               | 7                          | 3126                               | 1,78    | 79,70         |  |       |    |  |       |
| AAEL000567      | 2-3           | 5718               | 16                         | 2673                               | 2,80    | 46,75         |  |       |    |  |       |
| AAEL000578      | 1-2           | 19151              | 45                         | 8118                               | 2,35    | 42,39         |  |       |    |  |       |
| AAEL000580      | 1-2           | 23060              | 51                         | 10616                              | 2,21    | 46,04         |  |       |    |  |       |

|            |     |        |     |       |      |       |
|------------|-----|--------|-----|-------|------|-------|
| AAEL000593 | 2-3 | 1227   | 2   | 762   | 1,63 | 62,10 |
| AAEL000600 | 1-2 | 37808  | 92  | 19978 | 2,43 | 52,84 |
| AAEL000617 | 1-2 | 3723   | 7   | 2149  | 1,88 | 57,72 |
| AAEL000643 | 1-2 | 13901  | 37  | 5289  | 2,66 | 38,05 |
| AAEL000666 | 2-3 | 10579  | 21  | 7361  | 1,99 | 69,58 |
| AAEL000683 | 1-2 | 5963   | 10  | 1289  | 1,68 | 21,62 |
| AAEL000700 | 1-2 | 10397  | 12  | 6325  | 1,15 | 60,83 |
| AAEL000714 | 1-2 | 8353   | 17  | 2801  | 2,04 | 33,53 |
| AAEL000714 | 4-5 | 16641  | 37  | 9396  | 2,22 | 56,46 |
| AAEL000728 | 1-2 | 106842 | 187 | 35786 | 1,75 | 33,49 |
| AAEL000728 | 2-3 | 9097   | 18  | 2940  | 1,98 | 32,32 |
| AAEL000738 | 2-3 | 10509  | 20  | 3188  | 1,90 | 30,34 |
| AAEL000750 | 2-3 | 11306  | 23  | 7297  | 2,03 | 64,54 |
| AAEL000761 | 1-2 | 3082   | 6   | 678   | 1,95 | 22,00 |
| AAEL000780 | 3-4 | 13648  | 30  | 4058  | 2,20 | 29,73 |
| AAEL000792 | 1-2 | 56434  | 108 | 17862 | 1,91 | 31,65 |
| AAEL000805 | 1-2 | 15941  | 28  | 4645  | 1,76 | 29,14 |
| AAEL000825 | 2-3 | 3175   | 11  | 2164  | 3,46 | 68,16 |
| AAEL000845 | 5-6 | 1123   | 1   | 767   | 0,89 | 68,30 |
| AAEL000857 | 1-2 | 1552   | 3   | 677   | 1,93 | 43,62 |
| AAEL000857 | 2-3 | 4447   | 16  | 1733  | 3,60 | 38,97 |
| AAEL000869 | 3-4 | 6951   | 8   | 1064  | 1,15 | 15,31 |
| AAEL000883 | 1-2 | 7046   | 15  | 3255  | 2,13 | 46,20 |
| AAEL000898 | 2-3 | 10546  | 22  | 3892  | 2,09 | 36,90 |
| AAEL000906 | 1-2 | 11218  | 12  | 1546  | 1,07 | 13,78 |
| AAEL000927 | 1-2 | 15145  | 38  | 5113  | 2,51 | 33,76 |
| AAEL000943 | 1-2 | 31310  | 60  | 16698 | 1,92 | 53,33 |
| AAEL000965 | 1-2 | 1210   | 4   | 329   | 3,31 | 27,19 |
| AAEL000988 | 1-2 | 7612   | 20  | 3045  | 2,63 | 40,00 |
| AAEL001000 | 2-3 | 8161   | 17  | 4484  | 2,08 | 54,94 |
| AAEL001007 | 2-3 | 23267  | 50  | 10538 | 2,15 | 45,29 |
| AAEL001027 | 1-2 | 2821   | 3   | 229   | 1,06 | 8,12  |
| AAEL001056 | 1-2 | 6490   | 4   | 5043  | 0,62 | 77,70 |
| AAEL001056 | 4-5 | 6376   | 13  | 2220  | 2,04 | 34,82 |
| AAEL001072 | 1-2 | 2318   | 2   | 1298  | 0,86 | 56,00 |
| AAEL001108 | 2-3 | 13695  | 31  | 4444  | 2,26 | 32,45 |
| AAEL001121 | 6-7 | 16483  | 32  | 5104  | 1,94 | 30,97 |
| AAEL001147 | 3-4 | 4624   | 8   | 4040  | 1,73 | 87,37 |
| AAEL001149 | 2-3 | 19127  | 36  | 9783  | 1,88 | 51,15 |
| AAEL001169 | 3-4 | 8389   | 30  | 3436  | 3,58 | 40,96 |
| AAEL001193 | 1-2 | 7489   | 10  | 4648  | 1,34 | 62,06 |
| AAEL001217 | 1-2 | 4435   | 6   | 2831  | 1,35 | 63,83 |
| AAEL001234 | 1-2 | 3512   | 10  | 1930  | 2,85 | 54,95 |
| AAEL001254 | 3-4 | 3316   | 11  | 1667  | 3,32 | 50,27 |
| AAEL001261 | 1-2 | 7090   | 9   | 5392  | 1,27 | 76,05 |
| AAEL001262 | 1-2 | 15854  | 36  | 7527  | 2,27 | 47,48 |
| AAEL001278 | 1-2 | 8088   | 23  | 6857  | 2,84 | 84,78 |
| AAEL001279 | 2-3 | 6402   | 13  | 2096  | 2,03 | 32,74 |
| AAEL001297 | 5-6 | 15308  | 34  | 5575  | 2,22 | 36,42 |
| AAEL001307 | 1-2 | 13670  | 28  | 5572  | 2,05 | 40,76 |
| AAEL001323 | 1-2 | 10840  | 31  | 6877  | 2,86 | 63,44 |
| AAEL001349 | 5-6 | 5865   | 20  | 4486  | 3,41 | 76,49 |
| AAEL001371 | 4-5 | 1283   | 1   | 38    | 0,78 | 2,96  |
| AAEL001393 | 1-2 | 12867  | 22  | 8260  | 1,71 | 64,20 |
| AAEL001400 | 1-2 | 1803   | 3   | 321   | 1,66 | 17,80 |
| AAEL001423 | 1-2 | 15857  | 35  | 6599  | 2,21 | 41,62 |
| AAEL001458 | 2-3 | 65909  | 117 | 31789 | 1,78 | 48,23 |

|            |     |        |     |       |      |        |
|------------|-----|--------|-----|-------|------|--------|
| AAEL001478 | 1-2 | 5279   | 3   | 2455  | 0,57 | 46,51  |
| AAEL001494 | 3-4 | 16164  | 51  | 9845  | 3,16 | 60,91  |
| AAEL001500 | 3-4 | 22596  | 48  | 9404  | 2,12 | 41,62  |
| AAEL001500 | 4-5 | 6208   | 11  | 2201  | 1,77 | 35,45  |
| AAEL001527 | 2-3 | 13837  | 21  | 5509  | 1,52 | 39,81  |
| AAEL001527 | 3-4 | 9769   | 17  | 2618  | 1,74 | 26,80  |
| AAEL001538 | 1-2 | 31688  | 53  | 22052 | 1,67 | 69,59  |
| AAEL001549 | 1-2 | 15770  | 37  | 8782  | 2,35 | 55,69  |
| AAEL001578 | 1-2 | 10906  | 23  | 3231  | 2,11 | 29,63  |
| AAEL001593 | 1-2 | 14111  | 38  | 5477  | 2,69 | 38,81  |
| AAEL001601 | 2-3 | 3977   | 2   | 3435  | 0,50 | 86,37  |
| AAEL001622 | 2-3 | 14815  | 23  | 11908 | 1,55 | 80,38  |
| AAEL001632 | 1-2 | 6074   | 14  | 3936  | 2,30 | 64,80  |
| AAEL001632 | 3-4 | 5927   | 12  | 2206  | 2,02 | 37,22  |
| AAEL001658 | 4-5 | 26006  | 39  | 17991 | 1,50 | 69,18  |
| AAEL001660 | 1-2 | 7441   | 13  | 4731  | 1,75 | 63,58  |
| AAEL001687 | 2-3 | 11874  | 21  | 5360  | 1,77 | 45,14  |
| AAEL001709 | 3-4 | 12805  | 31  | 5881  | 2,42 | 45,93  |
| AAEL001715 | 2-3 | 1083   | 3   | 258   | 2,77 | 23,82  |
| AAEL001731 | 1-2 | 5992   | 4   | 3875  | 0,67 | 64,67  |
| AAEL001750 | 1-2 | 2004   | 5   | 646   | 2,50 | 32,24  |
| AAEL001765 | 5-6 | 1148   | 2   | 193   | 1,74 | 16,81  |
| AAEL001784 | 1-2 | 8077   | 18  | 3764  | 2,23 | 46,60  |
| AAEL001798 | 1-2 | 6600   | 25  | 4975  | 3,79 | 75,38  |
| AAEL001798 | 2-3 | 9171   | 19  | 4419  | 2,07 | 48,18  |
| AAEL001809 | 1-2 | 8551   | 26  | 2977  | 3,04 | 34,81  |
| AAEL001817 | 1-2 | 16172  | 37  | 7577  | 2,29 | 46,85  |
| AAEL001829 | 2-3 | 1856   | 4   | 549   | 2,16 | 29,58  |
| AAEL001844 | 2-3 | 10651  | 13  | 7033  | 1,22 | 66,03  |
| AAEL001851 | 1-2 | 11664  | 26  | 3673  | 2,23 | 31,49  |
| AAEL001867 | 1-2 | 15688  | 36  | 11733 | 2,29 | 74,79  |
| AAEL001875 | 2-3 | 116412 | 192 | 49640 | 1,65 | 42,64  |
| AAEL001896 | 1-2 | 39209  | 78  | 11155 | 1,99 | 28,45  |
| AAEL001901 | 1-2 | 5436   | 11  | 3368  | 2,02 | 61,96  |
| AAEL001901 | 2-3 | 8527   | 18  | 2166  | 2,11 | 25,40  |
| AAEL001919 | 4-5 | 1635   | 3   | 358   | 1,83 | 21,90  |
| AAEL001933 | 1-2 | 67624  | 144 | 29316 | 2,13 | 43,35  |
| AAEL001945 | 1-2 | 2699   | 6   | 922   | 2,22 | 34,16  |
| AAEL001976 | 1-2 | 4030   | 9   | 1796  | 2,23 | 44,57  |
| AAEL001976 | 2-3 | 1177   | 5   | 480   | 4,25 | 40,78  |
| AAEL001979 | 2-3 | 8758   | 19  | 4654  | 2,17 | 53,14  |
| AAEL001982 | 1-2 | 2556   | 6   | 721   | 2,35 | 28,21  |
| AAEL001990 | 1-2 | 1072   | 1   | 1072  | 0,93 | 100,00 |
| AAEL002009 | 3-4 | 13728  | 33  | 5243  | 2,40 | 38,19  |
| AAEL002018 | 3-4 | 17181  | 24  | 7288  | 1,40 | 42,42  |
| AAEL002031 | 1-2 | 7631   | 22  | 3819  | 2,88 | 50,05  |
| AAEL002049 | 1-2 | 4929   | 11  | 2336  | 2,23 | 47,39  |
| AAEL002049 | 4-5 | 13927  | 30  | 6996  | 2,15 | 50,23  |
| AAEL002067 | 1-2 | 2248   | 3   | 1864  | 1,33 | 82,92  |
| AAEL002075 | 1-2 | 5396   | 10  | 1596  | 1,85 | 29,58  |
| AAEL002097 | 2-3 | 14783  | 32  | 5381  | 2,16 | 36,40  |
| AAEL002100 | 1-2 | 5645   | 14  | 2437  | 2,48 | 43,17  |
| AAEL002100 | 2-3 | 40619  | 67  | 16205 | 1,65 | 39,90  |
| AAEL002115 | 2-3 | 24824  | 55  | 14069 | 2,22 | 56,67  |
| AAEL002132 | 1-2 | 10741  | 30  | 5622  | 2,79 | 52,34  |
| AAEL002132 | 2-3 | 7618   | 24  | 3150  | 3,15 | 41,35  |
| AAEL002145 | 4-5 | 11198  | 17  | 6115  | 1,52 | 54,61  |

|            |     |       |    |       |      |        |
|------------|-----|-------|----|-------|------|--------|
| AAEL002154 | 2-3 | 3283  | 3  | 2782  | 0,91 | 84,74  |
| AAEL002170 | 1-2 | 29943 | 56 | 16871 | 1,87 | 56,34  |
| AAEL002194 | 1-2 | 17645 | 49 | 7300  | 2,78 | 41,37  |
| AAEL002205 | 1-2 | 3049  | 10 | 911   | 3,28 | 29,88  |
| AAEL002220 | 3-4 | 27738 | 70 | 18305 | 2,52 | 65,99  |
| AAEL002235 | 1-2 | 10998 | 20 | 6612  | 1,82 | 60,12  |
| AAEL002250 | 1-2 | 1598  | 3  | 1341  | 1,88 | 83,92  |
| AAEL002277 | 1-2 | 6570  | 18 | 2871  | 2,74 | 43,70  |
| AAEL002299 | 1-2 | 17242 | 25 | 6168  | 1,45 | 35,77  |
| AAEL002300 | 1-2 | 3333  | 1  | 3333  | 0,30 | 100,00 |
| AAEL002319 | 2-3 | 19598 | 34 | 12504 | 1,73 | 63,80  |
| AAEL002330 | 1-2 | 9968  | 17 | 7324  | 1,71 | 73,48  |
| AAEL002345 | 2-3 | 7992  | 27 | 4280  | 3,38 | 53,55  |
| AAEL002345 | 3-4 | 19159 | 40 | 11964 | 2,09 | 62,45  |
| AAEL002376 | 2-3 | 6471  | 16 | 2093  | 2,47 | 32,34  |
| AAEL002397 | 1-2 | 27371 | 65 | 11019 | 2,37 | 40,26  |
| AAEL002403 | 1-2 | 5029  | 1  | 4482  | 0,20 | 89,12  |
| AAEL002421 | 1-2 | 4685  | 11 | 2231  | 2,35 | 47,62  |
| AAEL002446 | 1-2 | 11613 | 28 | 3255  | 2,41 | 28,03  |
| AAEL002446 | 5-6 | 1770  | 2  | 253   | 1,13 | 14,29  |
| AAEL002465 | 2-3 | 10253 | 13 | 5265  | 1,27 | 51,35  |
| AAEL002487 | 4-5 | 8727  | 11 | 1619  | 1,26 | 18,55  |
| AAEL002500 | 1-2 | 4791  | 6  | 1695  | 1,25 | 35,38  |
| AAEL002521 | 1-2 | 6035  | 7  | 5124  | 1,16 | 84,90  |
| AAEL002544 | 2-3 | 4366  | 8  | 3709  | 1,83 | 84,95  |
| AAEL002557 | 2-3 | 3137  | 8  | 1343  | 2,55 | 42,81  |
| AAEL002575 | 1-2 | 7565  | 18 | 2904  | 2,38 | 38,39  |
| AAEL002575 | 4-5 | 8017  | 22 | 4215  | 2,74 | 52,58  |
| AAEL002581 | 1-2 | 13263 | 30 | 3629  | 2,26 | 27,36  |
| AAEL002593 | 2-3 | 10636 | 18 | 7175  | 1,69 | 67,46  |
| AAEL002600 | 1-2 | 5922  | 19 | 3760  | 3,21 | 63,49  |
| AAEL002615 | 1-2 | 4497  | 9  | 1229  | 2,00 | 27,33  |
| AAEL002627 | 1-2 | 3913  | 14 | 2503  | 3,58 | 63,97  |
| AAEL002649 | 1-2 | 3221  | 7  | 1347  | 2,17 | 41,82  |
| AAEL002661 | 1-2 | 16905 | 33 | 11628 | 1,95 | 68,78  |
| AAEL002687 | 1-2 | 10862 | 12 | 6856  | 1,10 | 63,12  |
| AAEL002700 | 2-3 | 8869  | 18 | 6988  | 2,03 | 78,79  |
| AAEL002710 | 1-2 | 2680  | 4  | 2498  | 1,49 | 93,21  |
| AAEL002715 | 1-2 | 9586  | 19 | 5408  | 1,98 | 56,42  |
| AAEL002727 | 3-4 | 18724 | 42 | 10132 | 2,24 | 54,11  |
| AAEL002758 | 1-2 | 16143 | 27 | 7074  | 1,67 | 43,82  |
| AAEL002770 | 1-2 | 25117 | 35 | 20564 | 1,39 | 81,87  |
| AAEL002789 | 1-2 | 15673 | 29 | 6002  | 1,85 | 38,30  |
| AAEL002802 | 1-2 | 16959 | 13 | 12589 | 0,77 | 74,23  |
| AAEL002819 | 2-3 | 20199 | 37 | 13141 | 1,83 | 65,06  |
| AAEL002835 | 2-3 | 1818  | 3  | 161   | 1,65 | 8,86   |
| AAEL002851 | 1-2 | 15591 | 20 | 3135  | 1,28 | 20,11  |
| AAEL002869 | 1-2 | 3733  | 6  | 1368  | 1,61 | 36,65  |
| AAEL002888 | 1-2 | 1370  | 2  | 140   | 1,46 | 10,22  |
| AAEL002903 | 1-2 | 26041 | 61 | 8976  | 2,34 | 34,47  |
| AAEL002913 | 1-2 | 20038 | 49 | 8131  | 2,45 | 40,58  |
| AAEL002922 | 1-2 | 9925  | 22 | 5644  | 2,22 | 56,87  |
| AAEL002925 | 2-3 | 11513 | 22 | 8990  | 1,91 | 78,09  |
| AAEL002937 | 1-2 | 20341 | 48 | 10997 | 2,36 | 54,06  |
| AAEL002949 | 1-2 | 29851 | 73 | 10355 | 2,45 | 34,69  |
| AAEL002961 | 1-2 | 11730 | 17 | 6588  | 1,45 | 56,16  |
| AAEL002971 | 1-2 | 17558 | 39 | 6289  | 2,22 | 35,82  |

|            |     |       |     |       |      |       |
|------------|-----|-------|-----|-------|------|-------|
| AAEL002985 | 3-4 | 13636 | 29  | 6446  | 2,13 | 47,27 |
| AAEL002987 | 1-2 | 16226 | 28  | 7858  | 1,73 | 48,43 |
| AAEL003003 | 1-2 | 26321 | 63  | 8625  | 2,39 | 32,77 |
| AAEL003015 | 1-2 | 39477 | 75  | 18092 | 1,90 | 45,83 |
| AAEL003015 | 3-4 | 13229 | 23  | 6230  | 1,74 | 47,09 |
| AAEL003027 | 2-3 | 14595 | 29  | 5801  | 1,99 | 39,75 |
| AAEL003052 | 1-2 | 44650 | 112 | 19155 | 2,51 | 42,90 |
| AAEL003078 | 2-3 | 25056 | 79  | 12833 | 3,15 | 51,22 |
| AAEL003091 | 4-5 | 10797 | 34  | 7027  | 3,15 | 65,08 |
| AAEL003107 | 2-3 | 5013  | 30  | 4232  | 5,98 | 84,42 |
| AAEL003126 | 1-2 | 7431  | 25  | 3860  | 3,36 | 51,94 |
| AAEL003129 | 1-2 | 24999 | 58  | 13938 | 2,32 | 55,75 |
| AAEL003154 | 3-4 | 14267 | 34  | 7995  | 2,38 | 56,04 |
| AAEL003179 | 1-2 | 11137 | 17  | 5111  | 1,53 | 45,89 |
| AAEL003199 | 2-3 | 6594  | 12  | 1391  | 1,82 | 21,09 |
| AAEL003205 | 1-2 | 3674  | 11  | 3119  | 2,99 | 84,89 |
| AAEL003220 | 1-2 | 81976 | 152 | 39643 | 1,85 | 48,36 |
| AAEL003220 | 3-4 | 18454 | 34  | 8531  | 1,84 | 46,23 |
| AAEL003229 | 2-3 | 3451  | 9   | 1915  | 2,61 | 55,49 |
| AAEL003243 | 1-2 | 7090  | 9   | 5392  | 1,27 | 76,05 |
| AAEL003269 | 1-2 | 9196  | 18  | 2323  | 1,96 | 25,26 |
| AAEL003291 | 1-2 | 21506 | 41  | 11746 | 1,91 | 54,62 |
| AAEL003301 | 1-2 | 23890 | 50  | 13537 | 2,09 | 56,66 |
| AAEL003318 | 1-2 | 13214 | 21  | 2971  | 1,59 | 22,48 |
| AAEL003327 | 1-2 | 5696  | 16  | 1888  | 2,81 | 33,15 |
| AAEL003349 | 3-4 | 19214 | 28  | 8129  | 1,46 | 42,31 |
| AAEL003363 | 2-3 | 1439  | 2   | 916   | 1,39 | 63,66 |
| AAEL003381 | 1-2 | 18901 | 44  | 8574  | 2,33 | 45,36 |
| AAEL003399 | 1-2 | 17238 | 34  | 10571 | 1,97 | 61,32 |
| AAEL004005 | 1-2 | 3948  | 11  | 1982  | 2,79 | 50,20 |
| AAEL004017 | 2-3 | 9661  | 32  | 4495  | 3,31 | 46,53 |
| AAEL004031 | 1-2 | 6434  | 19  | 2571  | 2,95 | 39,96 |
| AAEL004056 | 1-2 | 1257  | 3   | 142   | 2,39 | 11,30 |
| AAEL004070 | 1-2 | 4991  | 7   | 1714  | 1,40 | 34,34 |
| AAEL004076 | 1-2 | 2448  | 5   | 448   | 2,04 | 18,30 |
| AAEL004099 | 2-3 | 4816  | 11  | 3186  | 2,28 | 66,15 |
| AAEL004105 | 1-2 | 4804  | 10  | 2281  | 2,08 | 47,48 |
| AAEL004117 | 2-3 | 7657  | 17  | 2637  | 2,22 | 34,44 |
| AAEL004132 | 2-3 | 1208  | 2   | 215   | 1,66 | 17,80 |
| AAEL004152 | 1-2 | 6802  | 18  | 2001  | 2,65 | 29,42 |
| AAEL004177 | 2-3 | 30367 | 58  | 18523 | 1,91 | 61,00 |
| AAEL004189 | 1-2 | 7062  | 32  | 5374  | 4,53 | 76,10 |
| AAEL004199 | 1-2 | 1270  | 4   | 900   | 3,15 | 70,87 |
| AAEL004199 | 2-3 | 1747  | 4   | 243   | 2,29 | 13,91 |
| AAEL004200 | 2-3 | 13916 | 39  | 6550  | 2,80 | 47,07 |
| AAEL004208 | 5-6 | 2803  | 6   | 737   | 2,14 | 26,29 |
| AAEL004212 | 1-2 | 48577 | 109 | 18459 | 2,24 | 38,00 |
| AAEL004221 | 1-2 | 7648  | 23  | 2902  | 3,01 | 37,94 |
| AAEL004235 | 1-2 | 5147  | 15  | 1812  | 2,91 | 35,20 |
| AAEL004251 | 1-2 | 12020 | 33  | 5887  | 2,75 | 48,98 |
| AAEL004268 | 4-5 | 22316 | 42  | 15120 | 1,88 | 67,75 |
| AAEL004281 | 2-3 | 9799  | 22  | 7259  | 2,25 | 74,08 |
| AAEL004297 | 1-2 | 10894 | 26  | 6532  | 2,39 | 59,96 |
| AAEL004301 | 2-3 | 6373  | 19  | 3768  | 2,98 | 59,12 |
| AAEL004311 | 1-2 | 13104 | 38  | 7523  | 2,90 | 57,41 |
| AAEL004317 | 2-3 | 22518 | 45  | 15727 | 2,00 | 69,84 |
| AAEL004327 | 1-2 | 1705  | 6   | 841   | 3,52 | 49,33 |

|            |     |       |     |       |      |       |
|------------|-----|-------|-----|-------|------|-------|
| AAEL004327 | 2-3 | 4903  | 5   | 3946  | 1,02 | 80,48 |
| AAEL004346 | 1-2 | 10753 | 14  | 1708  | 1,30 | 15,88 |
| AAEL004351 | 1-2 | 11902 | 24  | 3376  | 2,02 | 28,36 |
| AAEL004375 | 2-3 | 17892 | 43  | 7525  | 2,40 | 42,06 |
| AAEL004381 | 1-2 | 7188  | 7   | 3754  | 0,97 | 52,23 |
| AAEL004381 | 3-4 | 32268 | 28  | 7305  | 0,87 | 22,64 |
| AAEL004393 | 4-5 | 15683 | 22  | 3045  | 1,40 | 19,42 |
| AAEL004401 | 1-2 | 2682  | 6   | 728   | 2,24 | 27,14 |
| AAEL004410 | 3-4 | 12985 | 29  | 6339  | 2,23 | 48,82 |
| AAEL004418 | 1-2 | 3471  | 8   | 2416  | 2,30 | 69,61 |
| AAEL004426 | 1-2 | 11124 | 30  | 7688  | 2,70 | 69,11 |
| AAEL004432 | 2-3 | 9672  | 17  | 3690  | 1,76 | 38,15 |
| AAEL004457 | 2-3 | 4333  | 10  | 1083  | 2,31 | 24,99 |
| AAEL004465 | 2-3 | 28676 | 54  | 21267 | 1,88 | 74,16 |
| AAEL004471 | 1-2 | 7903  | 24  | 4476  | 3,04 | 56,64 |
| AAEL004494 | 1-2 | 6940  | 17  | 3123  | 2,45 | 45,00 |
| AAEL004501 | 2-3 | 13521 | 33  | 5029  | 2,44 | 37,19 |
| AAEL004511 | 1-2 | 1838  | 4   | 844   | 2,18 | 45,92 |
| AAEL004515 | 3-4 | 14552 | 33  | 10264 | 2,27 | 70,53 |
| AAEL004518 | 1-2 | 2048  | 1   | 73    | 0,49 | 3,56  |
| AAEL004522 | 1-2 | 1346  | 5   | 620   | 3,71 | 46,06 |
| AAEL004534 | 3-4 | 52971 | 115 | 19307 | 2,17 | 36,45 |
| AAEL004559 | 1-2 | 19199 | 38  | 6649  | 1,98 | 34,63 |
| AAEL004571 | 1-2 | 8398  | 18  | 2726  | 2,14 | 32,46 |
| AAEL004587 | 1-2 | 8375  | 17  | 5325  | 2,03 | 63,58 |
| AAEL004601 | 1-2 | 8225  | 20  | 3131  | 2,43 | 38,07 |
| AAEL004624 | 2-3 | 10765 | 24  | 4257  | 2,23 | 39,54 |
| AAEL004653 | 2-3 | 14814 | 25  | 8299  | 1,69 | 56,02 |
| AAEL004673 | 1-2 | 6092  | 25  | 3297  | 4,10 | 54,12 |
| AAEL004691 | 4-5 | 12924 | 24  | 6363  | 1,86 | 49,23 |
| AAEL004703 | 1-2 | 17245 | 47  | 8366  | 2,73 | 48,51 |
| AAEL004719 | 2-3 | 2205  | 3   | 1163  | 1,36 | 52,74 |
| AAEL004719 | 3-4 | 23383 | 48  | 10350 | 2,05 | 44,26 |
| AAEL004725 | 1-2 | 14473 | 30  | 3987  | 2,07 | 27,55 |
| AAEL004732 | 1-2 | 28344 | 67  | 13102 | 2,36 | 46,22 |
| AAEL004739 | 2-3 | 14968 | 26  | 8901  | 1,74 | 59,47 |
| AAEL004739 | 2-3 | 14968 | 26  | 8901  | 1,74 | 59,47 |
| AAEL004741 | 1-2 | 8831  | 16  | 3006  | 1,81 | 34,04 |
| AAEL004756 | 3-4 | 5462  | 8   | 4962  | 1,46 | 90,85 |
| AAEL004761 | 2-3 | 5385  | 9   | 1043  | 1,67 | 19,37 |
| AAEL004774 | 2-3 | 11957 | 31  | 5393  | 2,59 | 45,10 |
| AAEL004784 | 1-2 | 1068  | 3   | 383   | 2,81 | 35,86 |
| AAEL004796 | 1-2 | 7754  | 20  | 1483  | 2,58 | 19,13 |
| AAEL004800 | 1-2 | 5962  | 12  | 2069  | 2,01 | 34,70 |
| AAEL004805 | 2-3 | 12029 | 39  | 6453  | 3,24 | 53,65 |
| AAEL004815 | 2-3 | 8313  | 14  | 7289  | 1,68 | 87,68 |
| AAEL004838 | 1-2 | 5738  | 16  | 2618  | 2,79 | 45,63 |
| AAEL004855 | 1-2 | 5395  | 9   | 1392  | 1,67 | 25,80 |
| AAEL004866 | 2-3 | 5741  | 15  | 2925  | 2,61 | 50,95 |
| AAEL004872 | 1-2 | 22156 | 55  | 10380 | 2,48 | 46,85 |
| AAEL004890 | 1-2 | 12405 | 15  | 8302  | 1,21 | 66,92 |
| AAEL004900 | 3-4 | 11314 | 23  | 3573  | 2,03 | 31,58 |
| AAEL004938 | 1-2 | 43738 | 80  | 20524 | 1,83 | 46,92 |
| AAEL004951 | 2-3 | 10894 | 23  | 4301  | 2,11 | 39,48 |
| AAEL004977 | 2-3 | 10164 | 14  | 4978  | 1,38 | 48,98 |
| AAEL004985 | 1-2 | 3485  | 11  | 1160  | 3,16 | 33,29 |
| AAEL004991 | 1-2 | 7772  | 19  | 3401  | 2,44 | 43,76 |

|            |     |       |    |       |      |       |
|------------|-----|-------|----|-------|------|-------|
| AAEL005001 | 1-2 | 27369 | 62 | 15402 | 2,27 | 56,28 |
| AAEL005030 | 3-4 | 15091 | 30 | 9130  | 1,99 | 60,50 |
| AAEL005080 | 1-2 | 16721 | 39 | 6584  | 2,33 | 39,38 |
| AAEL005080 | 5-6 | 4590  | 15 | 4074  | 3,27 | 88,76 |
| AAEL005121 | 1-2 | 26307 | 43 | 14474 | 1,63 | 55,02 |
| AAEL005121 | 3-4 | 9194  | 22 | 4450  | 2,39 | 48,40 |
| AAEL005200 | 1-2 | 16729 | 25 | 8306  | 1,49 | 49,65 |
| AAEL005200 | 3-4 | 16681 | 45 | 7042  | 2,70 | 42,22 |
| AAEL005290 | 1-2 | 9943  | 27 | 5356  | 2,72 | 53,87 |
| AAEL005290 | 2-3 | 1044  | 5  | 753   | 4,79 | 72,13 |
| AAEL005330 | 2-3 | 10229 | 23 | 6200  | 2,25 | 60,61 |
| AAEL005351 | 4-5 | 1836  | 5  | 976   | 2,72 | 53,16 |
| AAEL005372 | 2-3 | 22846 | 47 | 10152 | 2,06 | 44,44 |
| AAEL005380 | 3-4 | 15675 | 28 | 5625  | 1,79 | 35,89 |
| AAEL005400 | 3-4 | 9141  | 28 | 6115  | 3,06 | 66,90 |
| AAEL005422 | 1-2 | 27270 | 59 | 14809 | 2,16 | 54,31 |
| AAEL005422 | 6-7 | 5706  | 15 | 2150  | 2,63 | 37,68 |
| AAEL005440 | 1-2 | 3502  | 9  | 1392  | 2,57 | 39,75 |
| AAEL005440 | 2-3 | 5355  | 9  | 3098  | 1,68 | 57,85 |
| AAEL005460 | 1-2 | 42677 | 88 | 22671 | 2,06 | 53,12 |
| AAEL005460 | 4-5 | 9238  | 32 | 4454  | 3,46 | 48,21 |
| AAEL005490 | 4-5 | 12621 | 38 | 7080  | 3,01 | 56,10 |
| AAEL005495 | 3-4 | 8339  | 17 | 3495  | 2,04 | 41,91 |
| AAEL005495 | 8-9 | 2935  | 4  | 2047  | 1,36 | 69,74 |
| AAEL005500 | 1-2 | 33833 | 59 | 24871 | 1,74 | 73,51 |
| AAEL005510 | 2-3 | 1654  | 2  | 612   | 1,21 | 37,00 |
| AAEL005510 | 3-4 | 45444 | 77 | 28879 | 1,69 | 63,55 |
| AAEL005515 | 4-5 | 2474  | 7  | 973   | 2,83 | 39,33 |
| AAEL005515 | 5-6 | 4917  | 4  | 306   | 0,81 | 6,22  |
| AAEL005520 | 2-3 | 5550  | 19 | 1735  | 3,42 | 31,26 |
| AAEL005530 | 1-2 | 33289 | 74 | 12321 | 2,22 | 37,01 |
| AAEL005530 | 2-3 | 16802 | 26 | 8369  | 1,55 | 49,81 |
| AAEL005560 | 4-5 | 6534  | 16 | 2190  | 2,45 | 33,52 |
| AAEL005570 | 7-8 | 2732  | 9  | 1557  | 3,29 | 56,99 |
| AAEL005580 | 1-2 | 6392  | 10 | 1689  | 1,56 | 26,42 |
| AAEL005615 | 1-2 | 11890 | 24 | 9531  | 2,02 | 80,16 |
| AAEL005627 | 1-2 | 1165  | 4  | 295   | 3,43 | 25,32 |
| AAEL005640 | 2-3 | 44149 | 53 | 24441 | 1,20 | 55,36 |
| AAEL005655 | 1-2 | 16988 | 36 | 4162  | 2,12 | 24,50 |
| AAEL005672 | 1-2 | 12876 | 37 | 7449  | 2,87 | 57,85 |
| AAEL005680 | 2-3 | 10487 | 22 | 6092  | 2,10 | 58,09 |
| AAEL005683 | 1-2 | 9233  | 32 | 6330  | 3,47 | 68,56 |
| AAEL005697 | 4-5 | 36730 | 70 | 12350 | 1,91 | 33,62 |
| AAEL005700 | 1-2 | 28023 | 52 | 14641 | 1,86 | 52,25 |
| AAEL005740 | 2-3 | 7547  | 18 | 2746  | 2,39 | 36,39 |
| AAEL005750 | 6-7 | 24474 | 53 | 15342 | 2,17 | 62,69 |
| AAEL005762 | 1-2 | 17756 | 39 | 7993  | 2,20 | 45,02 |
| AAEL005773 | 1-2 | 1364  | 6  | 1210  | 4,40 | 88,71 |
| AAEL005780 | 3-4 | 1615  | 3  | 1119  | 1,86 | 69,29 |
| AAEL005790 | 1-2 | 10696 | 20 | 4251  | 1,87 | 39,74 |
| AAEL005795 | 2-3 | 11221 | 25 | 5879  | 2,23 | 52,39 |
| AAEL009002 | 2-3 | 14159 | 39 | 6055  | 2,75 | 42,76 |
| AAEL008001 | 1-2 | 29939 | 51 | 14828 | 1,70 | 49,53 |
| AAEL008001 | 2-3 | 16420 | 37 | 6140  | 2,25 | 37,39 |
| AAEL005801 | 4-5 | 10940 | 26 | 4393  | 2,38 | 40,16 |
| AAEL005099 | 2-3 | 7336  | 23 | 2896  | 3,14 | 39,48 |
| AAEL005821 | 2-3 | 9199  | 24 | 3492  | 2,61 | 37,96 |

|            |     |       |     |       |      |       |
|------------|-----|-------|-----|-------|------|-------|
| AAEL005842 | 2-3 | 5448  | 11  | 3586  | 2,02 | 65,82 |
| AAEL005858 | 1-2 | 11855 | 25  | 6888  | 2,11 | 58,10 |
| AAEL005874 | 3-4 | 20798 | 50  | 10066 | 2,40 | 48,40 |
| AAEL005892 | 1-2 | 36997 | 74  | 14421 | 2,00 | 38,98 |
| AAEL005911 | 2-3 | 3723  | 13  | 1343  | 3,49 | 36,07 |
| AAEL005927 | 1-2 | 1465  | 4   | 519   | 2,73 | 35,43 |
| AAEL005942 | 8-9 | 7496  | 18  | 4187  | 2,40 | 55,86 |
| AAEL005960 | 1-2 | 11872 | 12  | 5441  | 1,01 | 45,83 |
| AAEL005975 | 1-2 | 15419 | 43  | 7152  | 2,79 | 46,38 |
| AAEL005991 | 2-3 | 8809  | 19  | 3592  | 2,16 | 40,78 |
| AAEL006012 | 6-7 | 15780 | 44  | 8777  | 2,79 | 55,62 |
| AAEL006031 | 2-3 | 7503  | 19  | 3956  | 2,53 | 52,73 |
| AAEL006047 | 1-2 | 3723  | 8   | 1235  | 2,15 | 33,17 |
| AAEL006062 | 1-2 | 4048  | 4   | 504   | 0,99 | 12,45 |
| AAEL006085 | 1-2 | 51361 | 80  | 28268 | 1,56 | 55,04 |
| AAEL006102 | 1-2 | 8984  | 14  | 1705  | 1,56 | 18,98 |
| AAEL006120 | 2-3 | 21347 | 45  | 9144  | 2,11 | 42,84 |
| AAEL006137 | 1-2 | 4371  | 11  | 2575  | 2,52 | 58,91 |
| AAEL006140 | 2-3 | 20806 | 48  | 13077 | 2,31 | 62,85 |
| AAEL006160 | 1-2 | 79601 | 160 | 51027 | 2,01 | 64,10 |
| AAEL006080 | 3-4 | 22373 | 48  | 7730  | 2,15 | 34,55 |
| AAEL006204 | 1-2 | 29412 | 63  | 16584 | 2,14 | 56,39 |
| AAEL006222 | 1-2 | 3378  | 10  | 1136  | 2,96 | 33,63 |
| AAEL006240 | 3-4 | 14174 | 37  | 4419  | 2,61 | 31,18 |
| AAEL006257 | 1-2 | 13518 | 23  | 8718  | 1,70 | 64,49 |
| AAEL006271 | 3-4 | 14419 | 24  | 7422  | 1,66 | 51,47 |
| AAEL006291 | 1-2 | 5650  | 20  | 3335  | 3,54 | 59,03 |
| AAEL006300 | 2-3 | 16771 | 34  | 9772  | 2,03 | 58,27 |
| AAEL006318 | 1-2 | 5465  | 11  | 1277  | 2,01 | 23,37 |
| AAEL006339 | 1-2 | 10739 | 30  | 3485  | 2,79 | 32,45 |
| AAEL006369 | 2-3 | 28943 | 60  | 10804 | 2,07 | 37,33 |
| AAEL006380 | 2-3 | 16474 | 37  | 7041  | 2,25 | 42,74 |
| AAEL006397 | 3-4 | 8806  | 19  | 2773  | 2,16 | 31,49 |
| AAEL006409 | 3-4 | 2580  | 8   | 1802  | 3,10 | 69,84 |
| AAEL006422 | 2-3 | 20528 | 49  | 12532 | 2,39 | 61,05 |
| AAEL006440 | 2-3 | 3783  | 10  | 1460  | 2,64 | 38,59 |
| AAEL006459 | 1-2 | 4329  | 12  | 963   | 2,77 | 22,25 |
| AAEL006478 | 5-6 | 30795 | 46  | 18469 | 1,49 | 59,97 |
| AAEL006492 | 2-3 | 8946  | 22  | 4659  | 2,46 | 52,08 |
| AAEL006510 | 1-2 | 18612 | 19  | 12086 | 1,02 | 64,94 |
| AAEL006527 | 1-2 | 5431  | 11  | 2507  | 2,03 | 46,16 |
| AAEL006545 | 1-2 | 4218  | 11  | 1562  | 2,61 | 37,03 |
| AAEL006561 | 1-2 | 4278  | 10  | 2288  | 2,34 | 53,48 |
| AAEL006581 | 1-2 | 29808 | 64  | 13920 | 2,15 | 46,70 |
| AAEL006599 | 6-7 | 10174 | 18  | 5864  | 1,77 | 57,64 |
| AAEL006621 | 1-2 | 13582 | 28  | 8189  | 2,06 | 60,29 |
| AAEL006650 | 1-2 | 13171 | 32  | 6190  | 2,43 | 47,00 |
| AAEL006669 | 1-2 | 2814  | 7   | 2201  | 2,49 | 78,22 |
| AAEL006683 | 1-2 | 23903 | 53  | 10131 | 2,22 | 42,38 |
| AAEL006698 | 2-3 | 5873  | 8   | 1245  | 1,36 | 21,20 |
| AAEL006719 | 1-2 | 1765  | 2   | 1436  | 1,13 | 81,36 |
| AAEL006733 | 3-4 | 16425 | 25  | 7696  | 1,52 | 46,86 |
| AAEL006750 | 1-2 | 4781  | 10  | 2363  | 2,09 | 49,42 |
| AAEL006768 | 1-2 | 10796 | 23  | 4952  | 2,13 | 45,87 |
| AAEL006790 | 1-2 | 11103 | 30  | 5488  | 2,70 | 49,43 |
| AAEL006812 | 1-2 | 22541 | 59  | 8489  | 2,62 | 37,66 |
| AAEL006830 | 1-2 | 24214 | 50  | 7607  | 2,06 | 31,42 |



|            |      |       |     |       |      |       |
|------------|------|-------|-----|-------|------|-------|
| AAEL006847 | 1-2  | 14176 | 30  | 9655  | 2,12 | 68,11 |
| AAEL006861 | 2-3  | 3647  | 3   | 2928  | 0,82 | 80,29 |
| AAEL006885 | 5-6  | 8515  | 16  | 2561  | 1,88 | 30,08 |
| AAEL006899 | 2-3  | 10362 | 29  | 5835  | 2,80 | 56,31 |
| AAEL006899 | 3-4  | 32417 | 74  | 11590 | 2,28 | 35,75 |
| AAEL006912 | 2-3  | 4875  | 11  | 1865  | 2,26 | 38,26 |
| AAEL006934 | 1-2  | 8253  | 19  | 2375  | 2,30 | 28,78 |
| AAEL006951 | 2-3  | 10747 | 19  | 7267  | 1,77 | 67,62 |
| AAEL006970 | 1-2  | 5597  | 13  | 1385  | 2,32 | 24,75 |
| AAEL006881 | 4-5  | 8687  | 23  | 4508  | 2,65 | 51,89 |
| AAEL006881 | 8-9  | 3873  | 12  | 2152  | 3,10 | 55,56 |
| AAEL006899 | 3-4  | 32417 | 74  | 11590 | 2,28 | 35,75 |
| AAEL006910 | 2-3  | 14707 | 35  | 8674  | 2,38 | 58,98 |
| AAEL006922 | 2-3  | 89357 | 193 | 38772 | 2,16 | 43,39 |
| AAEL006942 | 3-4  | 16421 | 39  | 6224  | 2,38 | 37,90 |
| AAEL006955 | 3-4  | 19508 | 56  | 11832 | 2,87 | 60,65 |
| AAEL006970 | 2-3  | 12678 | 30  | 4591  | 2,37 | 36,21 |
| AAEL006982 | 1-2  | 4055  | 5   | 1945  | 1,23 | 47,97 |
| AAEL006993 | 2-3  | 26619 | 44  | 11102 | 1,65 | 41,71 |
| AAEL007001 | 1-2  | 9902  | 24  | 5119  | 2,42 | 51,70 |
| AAEL007015 | 1-2  | 7058  | 23  | 4711  | 3,26 | 66,75 |
| AAEL007028 | 1-2  | 14576 | 32  | 6912  | 2,20 | 47,42 |
| AAEL007040 | 2-3  | 45208 | 93  | 14616 | 2,06 | 32,33 |
| AAEL007065 | 3-4  | 24781 | 54  | 13942 | 2,18 | 56,26 |
| AAEL007082 | 9-10 | 10440 | 27  | 4030  | 2,59 | 38,60 |
| AAEL007100 | 4-5  | 16625 | 30  | 14558 | 1,80 | 87,57 |
| AAEL007114 | 1-2  | 15004 | 25  | 4506  | 1,67 | 30,03 |
| AAEL007129 | 2-3  | 12855 | 19  | 6643  | 1,48 | 51,68 |
| AAEL007139 | 1-2  | 14674 | 27  | 5571  | 1,84 | 37,97 |
| AAEL007151 | 3-4  | 34914 | 84  | 13262 | 2,41 | 37,98 |
| AAEL007164 | 4-5  | 24190 | 49  | 13847 | 2,03 | 57,24 |
| AAEL007178 | 4-5  | 4690  | 11  | 1289  | 2,35 | 27,48 |
| AAEL007191 | 1-2  | 5459  | 11  | 1581  | 2,02 | 28,96 |
| AAEL007200 | 2-3  | 28702 | 60  | 13688 | 2,09 | 47,69 |
| AAEL007218 | 1-2  | 31664 | 68  | 12615 | 2,15 | 39,84 |
| AAEL007128 | 6-7  | 14505 | 41  | 8822  | 2,83 | 60,82 |
| AAEL007230 | 1-2  | 4901  | 11  | 1385  | 2,24 | 28,26 |
| AAEL007244 | 3-4  | 1905  | 6   | 1740  | 3,15 | 91,34 |
| AAEL007255 | 2-3  | 19270 | 33  | 6139  | 1,71 | 31,86 |
| AAEL007268 | 1-2  | 5002  | 14  | 2779  | 2,80 | 55,56 |
| AAEL007280 | 1-2  | 6314  | 10  | 2358  | 1,58 | 37,35 |
| AAEL007293 | 1-2  | 10676 | 32  | 5109  | 3,00 | 47,86 |
| AAEL007310 | 1-2  | 10408 | 33  | 5037  | 3,17 | 48,40 |
| AAEL007322 | 4-5  | 28794 | 51  | 16280 | 1,77 | 56,54 |
| AAEL007331 | 3-4  | 11951 | 29  | 6862  | 2,43 | 57,42 |
| AAEL007342 | 1-2  | 22861 | 47  | 14794 | 2,06 | 64,71 |
| AAEL007342 | 2-3  | 12121 | 25  | 7227  | 2,06 | 59,62 |
| AAEL007359 | 4-5  | 47883 | 91  | 29178 | 1,90 | 60,94 |
| AAEL007368 | 1-2  | 11020 | 22  | 3866  | 2,00 | 35,08 |
| AAEL007381 | 2-3  | 20341 | 35  | 11386 | 1,72 | 55,98 |
| AAEL007397 | 2-3  | 55632 | 100 | 11208 | 1,80 | 20,15 |
| AAEL007397 | 3-4  | 18169 | 23  | 3362  | 1,27 | 18,50 |
| AAEL007410 | 3-4  | 9491  | 20  | 5872  | 2,11 | 61,87 |
| AAEL007425 | 1-2  | 44540 | 94  | 18811 | 2,11 | 42,23 |
| AAEL007435 | 1-2  | 10505 | 27  | 3816  | 2,57 | 36,33 |
| AAEL007438 | 1-2  | 5444  | 16  | 2117  | 2,94 | 38,89 |
| AAEL007448 | 2-3  | 11148 | 21  | 6322  | 1,88 | 56,71 |

|            |     |        |     |       |      |       |
|------------|-----|--------|-----|-------|------|-------|
| AAEL007459 | 1-2 | 5418   | 2   | 5210  | 0,37 | 96,16 |
| AAEL007470 | 1-2 | 37584  | 79  | 16731 | 2,10 | 44,52 |
| AAEL007483 | 1-2 | 25851  | 64  | 14477 | 2,48 | 56,00 |
| AAEL007498 | 4-5 | 8414   | 29  | 4058  | 3,45 | 48,23 |
| AAEL007512 | 1-2 | 11696  | 26  | 3562  | 2,22 | 30,45 |
| AAEL007524 | 1-2 | 1235   | 1   | 39    | 0,81 | 3,16  |
| AAEL007536 | 1-2 | 10355  | 30  | 5272  | 2,90 | 50,91 |
| AAEL007563 | 1-2 | 174301 | 351 | 78299 | 2,01 | 44,92 |
| AAEL007575 | 1-2 | 8651   | 23  | 5174  | 2,66 | 59,81 |
| AAEL007587 | 1-2 | 3147   | 12  | 946   | 3,81 | 30,06 |
| AAEL007597 | 1-2 | 23022  | 49  | 7730  | 2,13 | 33,58 |
| AAEL007610 | 1-2 | 14041  | 14  | 5683  | 1,00 | 40,47 |
| AAEL007610 | 3-4 | 34325  | 69  | 20221 | 2,01 | 58,91 |
| AAEL007624 | 1-2 | 53750  | 117 | 23886 | 2,18 | 44,44 |
| AAEL007638 | 1-2 | 7755   | 18  | 2237  | 2,32 | 28,85 |
| AAEL007649 | 2-3 | 7602   | 18  | 4418  | 2,37 | 58,12 |
| AAEL007662 | 1-2 | 16638  | 44  | 6199  | 2,64 | 37,26 |
| AAEL007678 | 1-2 | 7063   | 21  | 5278  | 2,97 | 74,73 |
| AAEL007680 | 1-2 | 10533  | 36  | 4871  | 3,42 | 46,25 |
| AAEL007693 | 1-2 | 9739   | 30  | 4313  | 3,08 | 44,29 |
| AAEL007693 | 2-3 | 9366   | 20  | 5906  | 2,14 | 63,06 |
| AAEL007721 | 1-2 | 7141   | 24  | 4451  | 3,36 | 62,33 |
| AAEL007731 | 4-5 | 10320  | 24  | 4384  | 2,33 | 42,48 |
| AAEL007739 | 1-2 | 7874   | 15  | 2387  | 1,91 | 30,31 |
| AAEL007748 | 1-2 | 5143   | 18  | 3386  | 3,50 | 65,84 |
| AAEL007748 | 2-3 | 6200   | 15  | 1550  | 2,42 | 25,00 |
| AAEL007763 | 2-3 | 10615  | 21  | 7373  | 1,98 | 69,46 |
| AAEL007770 | 2-3 | 33924  | 69  | 20021 | 2,03 | 59,02 |
| AAEL007770 | 4-5 | 10775  | 23  | 3962  | 2,13 | 36,77 |
| AAEL007791 | 1-2 | 5977   | 10  | 3400  | 1,67 | 56,88 |
| AAEL007799 | 3-4 | 3914   | 5   | 598   | 1,28 | 15,28 |
| AAEL007810 | 2-3 | 12861  | 15  | 9361  | 1,17 | 72,79 |
| AAEL007820 | 2-3 | 7164   | 22  | 2938  | 3,07 | 41,01 |
| AAEL007830 | 1-2 | 4626   | 11  | 1343  | 2,38 | 29,03 |
| AAEL007843 | 2-3 | 4887   | 7   | 1920  | 1,43 | 39,29 |
| AAEL007856 | 5-6 | 5205   | 3   | 4793  | 0,58 | 92,08 |
| AAEL007880 | 1-2 | 1409   | 1   | 54    | 0,71 | 3,83  |
| AAEL007894 | 1-2 | 1422   | 4   | 291   | 2,81 | 20,46 |
| AAEL007902 | 1-2 | 4173   | 11  | 2726  | 2,64 | 65,32 |
| AAEL007912 | 1-2 | 5120   | 18  | 2196  | 3,52 | 42,89 |
| AAEL007920 | 1-2 | 21203  | 31  | 11108 | 1,46 | 52,39 |
| AAEL007930 | 2-3 | 15576  | 29  | 8453  | 1,86 | 54,27 |
| AAEL007944 | 1-2 | 1692   | 1   | 1079  | 0,59 | 63,77 |
| AAEL007050 | 1-2 | 9196   | 19  | 4489  | 2,07 | 48,81 |
| AAEL007965 | 1-2 | 7184   | 23  | 5264  | 3,20 | 73,27 |
| AAEL007978 | 2-3 | 13877  | 27  | 3363  | 1,95 | 24,23 |
| AAEL007990 | 1-2 | 41940  | 78  | 22209 | 1,86 | 52,95 |
| AAEL008001 | 2-3 | 16420  | 37  | 6140  | 2,25 | 37,39 |
| AAEL008010 | 5-6 | 131077 | 235 | 80846 | 1,79 | 61,68 |
| AAEL008015 | 1-2 | 32485  | 68  | 10298 | 2,09 | 31,70 |
| AAEL008021 | 1-2 | 8336   | 18  | 5521  | 2,16 | 66,23 |
| AAEL008028 | 1-2 | 37348  | 65  | 15517 | 1,74 | 41,55 |
| AAEL008034 | 1-2 | 9772   | 19  | 1504  | 1,94 | 15,39 |
| AAEL008042 | 1-2 | 1770   | 6   | 1247  | 3,39 | 70,45 |
| AAEL008056 | 1-2 | 25033  | 53  | 7885  | 2,12 | 31,50 |
| AAEL008060 | 2-3 | 16118  | 46  | 7987  | 2,85 | 49,55 |
| AAEL008063 | 3-4 | 1845   | 1   | 57    | 0,54 | 3,09  |

|            |     |       |    |       |      |       |
|------------|-----|-------|----|-------|------|-------|
| AAEL008078 | 2-3 | 5940  | 23 | 4274  | 3,87 | 71,95 |
| AAEL008078 | 8-9 | 12371 | 18 | 9193  | 1,46 | 74,31 |
| AAEL008096 | 1-2 | 12188 | 13 | 6420  | 1,07 | 52,67 |
| AAEL008111 | 1-2 | 8022  | 16 | 3665  | 1,99 | 45,69 |
| AAEL008123 | 1-2 | 10466 | 25 | 5038  | 2,39 | 48,14 |
| AAEL008135 | 4-5 | 3529  | 11 | 3187  | 3,12 | 90,31 |
| AAEL008146 | 3-4 | 18929 | 25 | 11701 | 1,32 | 61,82 |
| AAEL008170 | 2-3 | 3950  | 9  | 2424  | 2,28 | 61,37 |
| AAEL008183 | 1-2 | 10767 | 24 | 4441  | 2,23 | 41,25 |
| AAEL008200 | 1-2 | 5240  | 10 | 3466  | 1,91 | 66,15 |
| AAEL008216 | 1-2 | 5538  | 12 | 1645  | 2,17 | 29,70 |
| AAEL008230 | 1-2 | 5670  | 10 | 2096  | 1,76 | 36,97 |
| AAEL008242 | 1-2 | 14715 | 31 | 4515  | 2,11 | 30,68 |
| AAEL008260 | 1-2 | 5282  | 15 | 1877  | 2,84 | 35,54 |
| AAEL008272 | 1-2 | 1506  | 9  | 652   | 5,98 | 43,29 |
| AAEL008285 | 1-2 | 7963  | 11 | 1122  | 1,38 | 14,09 |
| AAEL008298 | 3-4 | 13401 | 29 | 4222  | 2,16 | 31,51 |
| AAEL008314 | 1-2 | 7847  | 15 | 2822  | 1,91 | 35,96 |
| AAEL008340 | 2-3 | 10008 | 26 | 5501  | 2,60 | 54,97 |
| AAEL008357 | 1-2 | 2403  | 4  | 490   | 1,66 | 20,39 |
| AAEL008390 | 2-3 | 5029  | 13 | 3677  | 2,59 | 73,12 |
| AAEL008420 | 1-2 | 20798 | 60 | 11968 | 2,88 | 57,54 |
| AAEL008459 | 3-4 | 13515 | 32 | 8190  | 2,37 | 60,60 |
| AAEL008479 | 1-2 | 5972  | 14 | 5219  | 2,34 | 87,39 |
| AAEL008893 | 1-2 | 21360 | 56 | 9034  | 2,62 | 42,29 |
| AAEL008498 | 2-3 | 19452 | 56 | 7617  | 2,88 | 39,16 |
| AAEL008520 | 1-2 | 16627 | 30 | 10542 | 1,80 | 63,40 |
| AAEL008545 | 1-2 | 9452  | 30 | 3684  | 3,17 | 38,98 |
| AAEL008578 | 1-2 | 17172 | 44 | 7561  | 2,56 | 44,03 |
| AAEL008610 | 1-2 | 7978  | 25 | 5202  | 3,13 | 65,20 |
| AAEL008634 | 1-2 | 9241  | 23 | 3600  | 2,49 | 38,96 |
| AAEL008650 | 3-4 | 9439  | 23 | 5644  | 2,44 | 59,79 |
| AAEL008670 | 5-6 | 1299  | 2  | 119   | 1,54 | 9,16  |
| AAEL009002 | 1-2 | 33677 | 67 | 17897 | 1,99 | 53,14 |
| AAEL009002 | 2-3 | 14159 | 39 | 6055  | 2,75 | 42,76 |
| AAEL009024 | 1-2 | 8493  | 23 | 4641  | 2,71 | 54,65 |
| AAEL009024 | 4-5 | 12358 | 32 | 4520  | 2,59 | 36,58 |
| AAEL009049 | 1-2 | 4045  | 6  | 3131  | 1,48 | 77,40 |
| AAEL009049 | 4-5 | 12724 | 16 | 6192  | 1,26 | 48,66 |
| AAEL009068 | 1-2 | 9189  | 17 | 5252  | 1,85 | 57,16 |
| AAEL009083 | 1-2 | 5491  | 2  | 4705  | 0,36 | 85,69 |
| AAEL009100 | 1-2 | 1634  | 4  | 814   | 2,45 | 49,82 |
| AAEL009100 | 4-5 | 7856  | 23 | 2962  | 2,93 | 37,70 |
| AAEL009110 | 1-2 | 4836  | 7  | 640   | 1,45 | 13,23 |
| AAEL009110 | 3-4 | 13168 | 36 | 8531  | 2,73 | 64,79 |
| AAEL009139 | 1-2 | 7041  | 15 | 4896  | 2,13 | 69,54 |
| AAEL009154 | 3-4 | 9617  | 23 | 3815  | 2,39 | 39,67 |
| AAEL009154 | 4-5 | 1127  | 4  | 205   | 3,55 | 18,19 |
| AAEL009173 | 1-2 | 18752 | 40 | 10944 | 2,13 | 58,36 |
| AAEL009173 | 2-3 | 11779 | 30 | 6380  | 2,55 | 54,16 |
| AAEL009193 | 1-2 | 8979  | 26 | 3855  | 2,90 | 42,93 |
| AAEL009200 | 1-2 | 12226 | 22 | 6219  | 1,80 | 50,87 |
| AAEL009221 | 1-2 | 1683  | 2  | 450   | 1,19 | 26,74 |
| AAEL009221 | 2-3 | 2272  | 7  | 922   | 3,08 | 40,58 |
| AAEL009246 | 5-6 | 7166  | 17 | 5129  | 2,37 | 71,57 |
| AAEL009268 | 5-6 | 11823 | 16 | 8117  | 1,35 | 68,65 |
| AAEL009281 | 1-2 | 6639  | 19 | 2618  | 2,86 | 39,43 |

|            |     |        |     |       |      |       |
|------------|-----|--------|-----|-------|------|-------|
| AAEL009297 | 2-3 | 11656  | 34  | 4655  | 2,92 | 39,94 |
| AAEL009300 | 1-2 | 6957   | 19  | 4369  | 2,73 | 62,80 |
| AAEL009324 | 1-2 | 35034  | 58  | 21119 | 1,66 | 60,28 |
| AAEL009347 | 1-2 | 4219   | 12  | 3242  | 2,84 | 76,84 |
| AAEL009369 | 1-2 | 1655   | 2   | 719   | 1,21 | 43,44 |
| AAEL009369 | 2-3 | 18533  | 31  | 9277  | 1,67 | 50,06 |
| AAEL009381 | 2-3 | 11037  | 21  | 4918  | 1,90 | 44,56 |
| AAEL009400 | 1-2 | 14835  | 37  | 5049  | 2,49 | 34,03 |
| AAEL009415 | 1-2 | 5035   | 12  | 1318  | 2,38 | 26,18 |
| AAEL009437 | 1-2 | 13060  | 33  | 7634  | 2,53 | 58,45 |
| AAEL009437 | 5-6 | 4309   | 10  | 1396  | 2,32 | 32,40 |
| AAEL009451 | 1-2 | 1087   | 3   | 374   | 2,76 | 34,41 |
| AAEL009472 | 1-2 | 1882   | 1   | 417   | 0,53 | 22,16 |
| AAEL009495 | 2-3 | 7573   | 20  | 2388  | 2,64 | 31,53 |
| AAEL009495 | 5-6 | 10316  | 18  | 7309  | 1,74 | 70,85 |
| AAEL009500 | 2-3 | 6142   | 12  | 3496  | 1,95 | 56,92 |
| AAEL009521 | 1-2 | 44903  | 123 | 24995 | 2,74 | 55,66 |
| AAEL009521 | 2-3 | 3236   | 11  | 1860  | 3,40 | 57,48 |
| AAEL009543 | 1-2 | 17901  | 38  | 7956  | 2,12 | 44,44 |
| AAEL009561 | 1-2 | 24654  | 45  | 17066 | 1,83 | 69,22 |
| AAEL009585 | 1-2 | 31136  | 70  | 16367 | 2,25 | 52,57 |
| AAEL009600 | 4-5 | 11444  | 22  | 4555  | 1,92 | 39,80 |
| AAEL009616 | 1-2 | 47596  | 88  | 27452 | 1,85 | 57,68 |
| AAEL009634 | 3-4 | 21091  | 49  | 8376  | 2,32 | 39,71 |
| AAEL009634 | 4-5 | 28060  | 53  | 11747 | 1,89 | 41,86 |
| AAEL009654 | 2-3 | 23257  | 40  | 12524 | 1,72 | 53,85 |
| AAEL009674 | 5-6 | 2533   | 6   | 1026  | 2,37 | 40,51 |
| AAEL009695 | 1-2 | 8916   | 13  | 3012  | 1,46 | 33,78 |
| AAEL009695 | 2-3 | 4090   | 8   | 2690  | 1,96 | 65,77 |
| AAEL009700 | 1-2 | 2329   | 7   | 820   | 3,01 | 35,21 |
| AAEL009725 | 1-2 | 2655   | 8   | 1490  | 3,01 | 56,12 |
| AAEL009747 | 2-3 | 14380  | 25  | 9349  | 1,74 | 65,01 |
| AAEL009765 | 1-2 | 16909  | 30  | 5935  | 1,77 | 35,10 |
| AAEL009780 | 1-2 | 7262   | 16  | 3534  | 2,20 | 48,66 |
| AAEL009800 | 1-2 | 4428   | 14  | 3510  | 3,16 | 79,27 |
| AAEL009817 | 1-2 | 1963   | 8   | 1032  | 4,08 | 52,57 |
| AAEL009848 | 1-2 | 1297   | 2   | 224   | 1,54 | 17,27 |
| AAEL009861 | 1-2 | 40032  | 78  | 16928 | 1,95 | 42,29 |
| AAEL009879 | 2-3 | 5332   | 15  | 3340  | 2,81 | 62,64 |
| AAEL009898 | 2-3 | 12899  | 28  | 10129 | 2,17 | 78,53 |
| AAEL009900 | 1-2 | 1443   | 4   | 559   | 2,77 | 38,74 |
| AAEL009925 | 1-2 | 35975  | 85  | 14562 | 2,36 | 40,48 |
| AAEL009942 | 1-2 | 1506   | 3   | 916   | 1,99 | 60,82 |
| AAEL009942 | 3-4 | 28294  | 42  | 14326 | 1,48 | 50,63 |
| AAEL009960 | 2-3 | 15554  | 41  | 7297  | 2,64 | 46,91 |
| AAEL009976 | 2-3 | 3216   | 10  | 785   | 3,11 | 24,41 |
| AAEL009976 | 3-4 | 15776  | 36  | 9315  | 2,28 | 59,05 |
| AAEL009995 | 1-2 | 18140  | 24  | 13005 | 1,32 | 71,69 |
| AAEL009915 | 2-3 | 10150  | 18  | 5478  | 1,77 | 53,97 |
| AAEL009915 | 5-6 | 9333   | 19  | 2051  | 2,04 | 21,98 |
| AAEL010000 | 3-4 | 8.617  | 23  | 2718  | 2,67 | 31,54 |
| AAEL010020 | 2-3 | 20.833 | 58  | 9546  | 2,78 | 45,82 |
| AAEL010043 | 1-2 | 8159   | 13  | 1850  | 1,59 | 22,67 |
| AAEL010064 | 1-2 | 22132  | 44  | 9087  | 1,99 | 41,06 |
| AAEL010085 | 1-2 | 4333   | 13  | 1130  | 3,00 | 26,08 |
| AAEL010090 | 1-2 | 3168   | 6   | 1052  | 1,89 | 33,21 |
| AAEL010105 | 1-2 | 4542   | 13  | 3880  | 2,86 | 85,42 |

|            |     |       |     |       |      |       |
|------------|-----|-------|-----|-------|------|-------|
| AAEL010127 | 1-2 | 5058  | 11  | 1653  | 2,17 | 32,68 |
| AAEL010133 | 1-2 | 4123  | 8   | 3303  | 1,94 | 80,11 |
| AAEL010148 | 1-2 | 38816 | 60  | 17829 | 1,55 | 45,93 |
| AAEL010162 | 1-2 | 10587 | 26  | 5523  | 2,46 | 52,17 |
| AAEL010184 | 1-2 | 30315 | 53  | 20267 | 1,75 | 66,85 |
| AAEL010200 | 2-3 | 16734 | 30  | 6855  | 1,79 | 40,96 |
| AAEL010200 | 3-4 | 4592  | 12  | 1177  | 2,61 | 25,63 |
| AAEL010215 | 2-3 | 18018 | 34  | 11551 | 1,89 | 64,11 |
| AAEL010230 | 2-3 | 11258 | 35  | 8065  | 3,11 | 71,64 |
| AAEL010240 | 1-2 | 8303  | 10  | 2299  | 1,20 | 27,69 |
| AAEL010261 | 1-2 | 2125  | 5   | 569   | 2,35 | 26,78 |
| AAEL010270 | 1-2 | 5598  | 8   | 3946  | 1,43 | 70,49 |
| AAEL010282 | 1-2 | 67200 | 138 | 31243 | 2,05 | 46,49 |
| AAEL010299 | 3-4 | 1681  | 2   | 113   | 1,19 | 6,72  |
| AAEL010300 | 2-3 | 24729 | 48  | 12187 | 1,94 | 49,28 |
| AAEL010315 | 2-3 | 11298 | 31  | 7372  | 2,74 | 65,25 |
| AAEL010325 | 4-5 | 10922 | 21  | 4737  | 1,92 | 43,37 |
| AAEL010333 | 1-2 | 4629  | 9   | 1453  | 1,94 | 31,39 |
| AAEL010349 | 2-3 | 6176  | 19  | 2658  | 3,08 | 43,04 |
| AAEL010361 | 2-3 | 15764 | 31  | 5920  | 1,97 | 37,55 |
| AAEL010370 | 1-2 | 8469  | 23  | 3380  | 2,72 | 39,91 |
| AAEL010389 | 2-3 | 9984  | 27  | 5359  | 2,70 | 53,68 |
| AAEL010401 | 3-4 | 1373  | 3   | 433   | 2,18 | 31,54 |
| AAEL010401 | 7-8 | 8817  | 23  | 5233  | 2,61 | 59,35 |
| AAEL010423 | 2-3 | 11823 | 33  | 6667  | 2,79 | 56,39 |
| AAEL010445 | 1-2 | 40997 | 92  | 12784 | 2,24 | 31,18 |
| AAEL010445 | 2-3 | 10075 | 19  | 3631  | 1,89 | 36,04 |
| AAEL010460 | 1-2 | 11138 | 20  | 8875  | 1,80 | 79,68 |
| AAEL010480 | 1-2 | 10084 | 21  | 5666  | 2,08 | 56,19 |
| AAEL010492 | 2-3 | 7387  | 14  | 1538  | 1,90 | 20,82 |
| AAEL010502 | 1-2 | 9045  | 25  | 7630  | 2,76 | 84,36 |
| AAEL010502 | 4-5 | 10339 | 21  | 6777  | 2,03 | 65,55 |
| AAEL010523 | 2-3 | 1496  | 4   | 619   | 2,67 | 41,38 |
| AAEL010530 | 2-3 | 15570 | 28  | 10523 | 1,80 | 67,59 |
| AAEL010545 | 3-4 | 18245 | 47  | 8299  | 2,58 | 45,49 |
| AAEL010560 | 1-2 | 11138 | 20  | 8875  | 1,80 | 79,68 |
| AAEL010578 | 1-2 | 2530  | 6   | 811   | 2,37 | 32,06 |
| AAEL010595 | 2-3 | 3034  | 10  | 1033  | 3,30 | 34,05 |
| AAEL010595 | 1-2 | 6198  | 15  | 2016  | 2,42 | 32,53 |
| AAEL010612 | 1-2 | 7521  | 21  | 3504  | 2,79 | 46,59 |
| AAEL010635 | 1-2 | 7744  | 12  | 5394  | 1,55 | 69,65 |
| AAEL010655 | 2-3 | 10906 | 25  | 2658  | 2,29 | 24,37 |
| AAEL010672 | 2-3 | 30117 | 67  | 11276 | 2,22 | 37,44 |
| AAEL010690 | 1-2 | 8469  | 26  | 4929  | 3,07 | 58,20 |
| AAEL010713 | 1-2 | 2223  | 5   | 1122  | 2,25 | 50,47 |
| AAEL010729 | 3-4 | 14911 | 33  | 5390  | 2,21 | 36,15 |
| AAEL010740 | 2-3 | 8024  | 15  | 1506  | 1,87 | 18,77 |
| AAEL010765 | 1-2 | 32590 | 71  | 19785 | 2,18 | 60,71 |
| AAEL010781 | 1-2 | 3962  | 9   | 1006  | 2,27 | 25,39 |
| AAEL010796 | 2-3 | 21804 | 30  | 14476 | 1,38 | 66,39 |
| AAEL010813 | 1-2 | 8520  | 19  | 5818  | 2,23 | 68,29 |
| AAEL010823 | 2-3 | 19843 | 41  | 8531  | 2,07 | 42,99 |
| AAEL010834 | 2-3 | 10165 | 20  | 3681  | 1,97 | 36,21 |
| AAEL010850 | 1-2 | 13315 | 28  | 4737  | 2,10 | 35,58 |
| AAEL010850 | 4-5 | 6061  | 3   | 227   | 0,49 | 3,75  |
| AAEL010860 | 3-4 | 14717 | 34  | 7088  | 2,31 | 48,16 |
| AAEL010871 | 1-2 | 3520  | 12  | 1716  | 3,41 | 48,75 |

|             |       |       |    |       |      |       |
|-------------|-------|-------|----|-------|------|-------|
| AAEL010871  | 2-3   | 7932  | 14 | 1262  | 1,77 | 15,91 |
| AAEL010881  | 2-3   | 3030  | 7  | 1666  | 2,31 | 54,98 |
| AAEL010890  | 6-7   | 11732 | 25 | 3838  | 2,13 | 32,71 |
| AAEL010900  | 2-3   | 7857  | 15 | 4139  | 1,91 | 52,68 |
| AAEL010922  | 1-2   | 1360  | 2  | 177   | 1,47 | 13,01 |
| AAEL010930  | 1-2   | 5147  | 8  | 2739  | 1,55 | 53,22 |
| AAEL010946  | 4-5   | 7904  | 20 | 4461  | 2,53 | 56,44 |
| AAEL010961  | 2-3   | 7288  | 12 | 2911  | 1,65 | 39,94 |
| AAEL010971  | 2-3   | 2417  | 6  | 1069  | 2,48 | 44,23 |
| AAEL010985  | 1-2   | 1932  | 2  | 669   | 1,04 | 34,63 |
| AAEL011003  | 1-2   | 7141  | 13 | 2955  | 1,82 | 41,38 |
| AAEL011025  | 1-2   | 14842 | 33 | 6053  | 2,22 | 40,78 |
| AAEL011050  | 1-2   | 7334  | 17 | 3320  | 2,32 | 45,27 |
| AAEL011061  | 8-9   | 7259  | 23 | 3420  | 3,17 | 47,11 |
| AAEL011061  | 10-11 | 4789  | 15 | 2280  | 3,13 | 47,61 |
| AAEL011074  | 2-3   | 2223  | 5  | 715   | 2,25 | 32,16 |
| AAEL011097  | 1-2   | 4996  | 17 | 1964  | 3,40 | 39,31 |
| AAEL011119  | 2-3   | 4850  | 1  | 4368  | 0,21 | 90,06 |
| AAEL011142  | 1-2   | 10677 | 26 | 3074  | 2,44 | 28,79 |
| AAEL011165  | 1-2   | 2977  | 4  | 2123  | 1,34 | 71,31 |
| AAEL011176  | 1-2   | 3337  | 9  | 1119  | 2,70 | 33,53 |
| AAEL011191  | 1-2   | 10146 | 19 | 2304  | 1,87 | 22,71 |
| AAEL011211  | 1-2   | 18378 | 44 | 9869  | 2,39 | 53,70 |
| AAEL011235  | 2-3   | 21524 | 28 | 11791 | 1,30 | 54,78 |
| AAEL011257  | 1-2   | 5774  | 11 | 3339  | 1,91 | 57,83 |
| AAEL011276  | 1-2   | 6759  | 14 | 1269  | 2,07 | 18,77 |
| AAEL011298  | 1-2   | 11400 | 31 | 4648  | 2,72 | 40,77 |
| AAEL011319  | 1-2   | 8693  | 24 | 3600  | 2,76 | 41,41 |
| AAEL011330  | 3-4   | 9850  | 23 | 3594  | 2,34 | 36,49 |
| AAEL011345  | 2-3   | 5877  | 19 | 1677  | 3,23 | 28,53 |
| AAEL011361  | 1-2   | 14751 | 22 | 8204  | 1,49 | 55,62 |
| AAEL011371  | 1-2   | 4668  | 4  | 232   | 0,86 | 4,97  |
| AAEL011398  | 1-2   | 5295  | 17 | 2004  | 3,21 | 37,85 |
| AAEL011412  | 1-2   | 6095  | 11 | 1762  | 1,80 | 28,91 |
| AAEL011434  | 1-2   | 2073  | 4  | 466   | 1,93 | 22,48 |
| AAEL011447  | 1-2   | 1818  | 3  | 697   | 1,65 | 38,34 |
| AAEL011447  | 4-5   | 7064  | 18 | 3404  | 2,55 | 48,19 |
| AAEL011459  | 1-2   | 2671  | 9  | 886   | 3,37 | 33,17 |
| AAEL011469  | 1-2   | 10360 | 27 | 4986  | 2,61 | 48,13 |
| AAEL011479  | 6-7   | 7282  | 23 | 2879  | 3,16 | 39,54 |
| AAEL011492  | 1-2   | 11871 | 20 | 7452  | 1,68 | 62,77 |
| AAEL011513  | 6-7   | 18419 | 34 | 10974 | 1,85 | 59,58 |
| AAEL011534  | 6-7   | 10522 | 14 | 8524  | 1,33 | 81,01 |
| AAEL011556  | 1-2   | 7115  | 19 | 4064  | 2,67 | 57,12 |
| AAEL011570  | 3-4   | 17375 | 37 | 10274 | 2,13 | 59,13 |
| AAEL011583  | 2-3   | 11888 | 24 | 6169  | 2,02 | 51,89 |
| AAEL011599  | 1-2   | 8029  | 13 | 7046  | 1,62 | 87,76 |
| AAEL011612  | 1-2   | 41071 | 68 | 18607 | 1,66 | 45,30 |
| AAEL011622  | 1-2   | 5699  | 17 | 2696  | 2,98 | 47,31 |
| AAEL011638  | 3-4   | 14889 | 19 | 2935  | 1,28 | 19,71 |
| AAEL011654  | 2-3   | 10411 | 24 | 3627  | 2,31 | 34,84 |
| AAEL011654  | 3-4   | 12441 | 22 | 6856  | 1,77 | 55,11 |
| AAEL011671  | 2-3   | 5303  | 13 | 1581  | 2,45 | 29,81 |
| AAEL011689  | 2-3   | 12998 | 24 | 5479  | 1,85 | 42,15 |
| AAEL0116701 | 2-3   | 9051  | 24 | 4631  | 2,65 | 51,17 |
| AAEL011722  | 2-3   | 24410 | 45 | 17464 | 1,84 | 71,54 |
| AAEL011745  | 1-2   | 12826 | 33 | 4782  | 2,57 | 37,28 |

|            |     |       |    |       |      |        |
|------------|-----|-------|----|-------|------|--------|
| AAEL011760 | 1-2 | 6395  | 14 | 5629  | 2,19 | 88,02  |
| AAEL011779 | 1-2 | 20762 | 36 | 14929 | 1,73 | 71,91  |
| AAEL011792 | 2-3 | 8062  | 23 | 5035  | 2,85 | 62,45  |
| AAEL011800 | 2-3 | 17317 | 36 | 10229 | 2,08 | 59,07  |
| AAEL011810 | 1-2 | 2850  | 7  | 1618  | 2,46 | 56,77  |
| AAEL011834 | 2-3 | 25715 | 42 | 15294 | 1,63 | 59,48  |
| AAEL011857 | 1-2 | 3158  | 9  | 2537  | 2,85 | 80,34  |
| AAEL011878 | 3-4 | 5787  | 16 | 3373  | 2,76 | 58,29  |
| AAEL011899 | 2-3 | 14315 | 35 | 6833  | 2,44 | 47,73  |
| AAEL011922 | 1-2 | 4187  | 7  | 813   | 1,67 | 19,42  |
| AAEL011945 | 1-2 | 9728  | 21 | 4232  | 2,16 | 43,50  |
| AAEL011969 | 1-2 | 15609 | 25 | 6149  | 1,60 | 39,39  |
| AAEL011969 | 2-3 | 8860  | 11 | 6212  | 1,24 | 70,11  |
| AAEL011994 | 1-2 | 16236 | 41 | 7995  | 2,53 | 49,24  |
| AAEL012018 | 1-2 | 9213  | 30 | 5215  | 3,26 | 56,60  |
| AAEL012048 | 1-2 | 17854 | 48 | 6807  | 2,69 | 38,13  |
| AAEL012076 | 3-4 | 11645 | 29 | 5421  | 2,49 | 46,55  |
| AAEL012091 | 3-4 | 10187 | 15 | 2326  | 1,47 | 22,83  |
| AAEL012091 | 4-5 | 8600  | 27 | 3940  | 3,14 | 45,81  |
| AAEL012105 | 4-5 | 23399 | 9  | 1029  | 0,38 | 4,40   |
| AAEL012130 | 1-2 | 14295 | 49 | 5833  | 3,43 | 40,80  |
| AAEL012151 | 3-4 | 3468  | 7  | 3204  | 2,02 | 92,39  |
| AAEL012178 | 2-3 | 5694  | 12 | 4552  | 2,11 | 79,94  |
| AAEL012203 | 1-2 | 25280 | 57 | 8478  | 2,25 | 33,54  |
| AAEL012231 | 1-2 | 3186  | 1  | 3186  | 0,31 | 100,00 |
| AAEL012048 | 1-2 | 17854 | 48 | 6807  | 2,69 | 38,13  |
| AAEL012062 | 3-4 | 11169 | 20 | 2601  | 1,79 | 23,29  |
| AAEL012279 | 2-3 | 2376  | 8  | 1485  | 3,37 | 62,50  |
| AAEL012290 | 1-2 | 7971  | 16 | 3231  | 2,01 | 40,53  |
| AAEL012290 | 3-4 | 9037  | 16 | 2380  | 1,77 | 26,34  |
| AAEL012310 | 2-3 | 16593 | 34 | 5487  | 2,05 | 33,07  |
| AAEL012329 | 1-2 | 1749  | 5  | 873   | 2,86 | 49,91  |
| AAEL012354 | 2-3 | 4892  | 11 | 2327  | 2,25 | 47,57  |
| AAEL012370 | 1-2 | 11347 | 25 | 5573  | 2,20 | 49,11  |
| AAEL012396 | 1-2 | 6342  | 14 | 2953  | 2,21 | 46,56  |
| AAEL012420 | 3-4 | 8504  | 19 | 3245  | 2,23 | 38,16  |
| AAEL012440 | 1-2 | 20381 | 34 | 11782 | 1,67 | 57,81  |
| AAEL012440 | 2-3 | 13392 | 34 | 5127  | 2,54 | 38,28  |
| AAEL012451 | 1-2 | 3941  | 9  | 1047  | 2,28 | 26,57  |
| AAEL012465 | 2-3 | 1356  | 5  | 588   | 3,69 | 43,36  |
| AAEL012482 | 1-2 | 1147  | 5  | 870   | 4,36 | 75,85  |
| AAEL012500 | 3-4 | 9935  | 28 | 6509  | 2,82 | 65,52  |
| AAEL012524 | 1-2 | 9837  | 24 | 3690  | 2,44 | 37,51  |
| AAEL012532 | 2-3 | 4865  | 15 | 2078  | 3,08 | 42,71  |
| AAEL012549 | 1-2 | 23451 | 54 | 13144 | 2,30 | 56,05  |
| AAEL012467 | 1-2 | 19183 | 29 | 13318 | 1,51 | 69,43  |
| AAEL012467 | 3-4 | 13151 | 40 | 6911  | 3,04 | 52,55  |
| AAEL012604 | 1-2 | 38542 | 86 | 14709 | 2,23 | 38,16  |
| AAEL012620 | 1-2 | 37079 | 73 | 14619 | 1,97 | 39,43  |
| AAEL012640 | 2-3 | 11636 | 28 | 4656  | 2,41 | 40,01  |
| AAEL012662 | 1-2 | 5539  | 16 | 2226  | 2,89 | 40,19  |
| AAEL012662 | 2-3 | 6482  | 17 | 2994  | 2,62 | 46,19  |
| AAEL012684 | 2-3 | 6177  | 19 | 4200  | 3,08 | 67,99  |
| AAEL012699 | 1-2 | 9147  | 18 | 2743  | 1,97 | 29,99  |
| AAEL012714 | 1-2 | 5260  | 11 | 4867  | 2,09 | 92,53  |
| AAEL012730 | 8-9 | 20006 | 40 | 11082 | 2,00 | 55,39  |
| AAEL012749 | 1-2 | 8107  | 13 | 5676  | 1,60 | 70,01  |

|            |     |       |    |       |      |       |
|------------|-----|-------|----|-------|------|-------|
| AAEL012761 | 2-3 | 7971  | 16 | 4147  | 2,01 | 52,03 |
| AAEL012784 | 1-2 | 2521  | 6  | 756   | 2,38 | 29,99 |
| AAEL012802 | 2-3 | 4474  | 13 | 1765  | 2,91 | 39,45 |
| AAEL012820 | 3-4 | 9039  | 22 | 4082  | 2,43 | 45,16 |
| AAEL012844 | 3-4 | 13869 | 27 | 6000  | 1,95 | 43,26 |
| AAEL012860 | 1-2 | 18110 | 34 | 10037 | 1,88 | 55,42 |
| AAEL012881 | 2-3 | 3833  | 13 | 1530  | 3,39 | 39,92 |
| AAEL012881 | 3-4 | 3815  | 9  | 654   | 2,36 | 17,14 |
| AAEL012992 | 1-2 | 3721  | 14 | 1787  | 3,76 | 48,02 |
| AAEL013015 | 1-2 | 25296 | 52 | 10005 | 2,06 | 39,55 |
| AAEL013034 | 3-4 | 4766  | 7  | 2832  | 1,47 | 59,42 |
| AAEL013034 | 4-5 | 18655 | 28 | 13950 | 1,50 | 74,78 |
| AAEL013049 | 1-2 | 9598  | 18 | 2904  | 1,88 | 30,26 |
| AAEL013059 | 2-3 | 18158 | 39 | 8581  | 2,15 | 47,26 |
| AAEL013004 | 4-5 | 1760  | 4  | 925   | 2,27 | 52,56 |
| AAEL013025 | 2-3 | 11672 | 22 | 6377  | 1,88 | 54,64 |
| AAEL013050 | 1-2 | 8756  | 24 | 4883  | 2,74 | 55,77 |
| AAEL013071 | 1-2 | 11003 | 23 | 7039  | 2,09 | 63,97 |
| AAEL013092 | 2-3 | 3521  | 10 | 1559  | 2,84 | 44,28 |
| AAEL013109 | 1-2 | 2494  | 5  | 1976  | 2,00 | 79,23 |
| AAEL013128 | 2-3 | 40075 | 76 | 13219 | 1,90 | 32,99 |
| AAEL013145 | 1-2 | 5155  | 11 | 1870  | 2,13 | 36,28 |
| AAEL013172 | 1-2 | 13352 | 25 | 6440  | 1,87 | 48,23 |
| AAEL013199 | 4-5 | 4056  | 7  | 2933  | 1,73 | 72,31 |
| AAEL013219 | 3-4 | 7507  | 9  | 1534  | 1,20 | 20,43 |
| AAEL013219 | 6-7 | 11138 | 17 | 3693  | 1,53 | 33,16 |
| AAEL013230 | 4-5 | 7117  | 16 | 2115  | 2,25 | 29,72 |
| AAEL013251 | 2-3 | 17707 | 29 | 11526 | 1,64 | 65,09 |
| AAEL013274 | 2-3 | 10534 | 21 | 3564  | 1,99 | 33,83 |
| AAEL013297 | 1-2 | 1445  | 2  | 106   | 1,38 | 7,34  |
| AAEL013313 | 1-2 | 7237  | 10 | 4102  | 1,38 | 56,68 |
| AAEL013333 | 2-3 | 14215 | 30 | 9360  | 2,11 | 65,85 |
| AAEL013359 | 1-2 | 12741 | 30 | 4053  | 2,35 | 31,81 |
| AAEL013378 | 4-5 | 15679 | 40 | 9312  | 2,55 | 59,39 |
| AAEL013378 | 5-6 | 10079 | 21 | 4147  | 2,08 | 41,14 |
| AAEL013398 | 4-5 | 12680 | 26 | 8411  | 2,05 | 66,33 |
| AAEL013425 | 2-3 | 41048 | 93 | 19711 | 2,27 | 48,02 |
| AAEL013441 | 1-2 | 25962 | 57 | 15625 | 2,20 | 60,18 |
| AAEL013464 | 2-3 | 5542  | 9  | 3971  | 1,62 | 71,65 |
| AAEL013482 | 2-3 | 15020 | 32 | 4349  | 2,13 | 28,95 |
| AAEL013483 | 1-2 | 8807  | 10 | 6859  | 1,14 | 77,88 |
| AAEL013501 | 3-4 | 7060  | 18 | 5518  | 2,55 | 78,16 |
| AAEL013521 | 2-3 | 6060  | 14 | 2200  | 2,31 | 36,30 |
| AAEL013530 | 1-2 | 5578  | 13 | 1649  | 2,33 | 29,56 |
| AAEL013530 | 2-3 | 55054 | 42 | 8688  | 0,76 | 15,78 |
| AAEL013542 | 2-3 | 11431 | 30 | 4124  | 2,62 | 36,08 |
| AAEL013559 | 8-9 | 2964  | 2  | 149   | 0,67 | 5,03  |
| AAEL013574 | 4-5 | 12165 | 20 | 2731  | 1,64 | 22,45 |
| AAEL013592 | 1-2 | 10822 | 20 | 9580  | 1,85 | 88,52 |
| AAEL013592 | 2-3 | 6916  | 12 | 3227  | 1,74 | 46,66 |
| AAEL013610 | 1-2 | 4099  | 7  | 2421  | 1,71 | 59,06 |
| AAEL013625 | 3-4 | 14475 | 33 | 4761  | 2,28 | 32,89 |
| AAEL013644 | 6-7 | 6840  | 12 | 2078  | 1,75 | 30,38 |
| AAEL013662 | 3-4 | 13903 | 28 | 5107  | 2,01 | 36,73 |
| AAEL013683 | 1-2 | 14528 | 32 | 6402  | 2,20 | 44,07 |
| AAEL013700 | 1-2 | 16004 | 36 | 8301  | 2,25 | 51,87 |
| AAEL013729 | 1-2 | 5219  | 14 | 1488  | 2,68 | 28,51 |



|            |     |       |    |       |      |       |
|------------|-----|-------|----|-------|------|-------|
| AAEL013746 | 3-4 | 2498  | 9  | 748   | 3,60 | 29,94 |
| AAEL013761 | 1-2 | 49073 | 92 | 21259 | 1,87 | 43,32 |
| AAEL013770 | 1-2 | 7050  | 22 | 3416  | 3,12 | 48,45 |
| AAEL013783 | 3-4 | 17369 | 35 | 6078  | 2,02 | 34,99 |
| AAEL013799 | 1-2 | 13400 | 29 | 7803  | 2,16 | 58,23 |
| AAEL013811 | 4-5 | 8828  | 23 | 5172  | 2,61 | 58,59 |
| AAEL013829 | 1-2 | 43545 | 73 | 12782 | 1,68 | 29,35 |
| AAEL013841 | 1-2 | 17216 | 34 | 12268 | 1,97 | 71,26 |
| AAEL013860 | 1-2 | 16091 | 22 | 9879  | 1,37 | 61,39 |
| AAEL013880 | 3-4 | 17966 | 28 | 10630 | 1,56 | 59,17 |
| AAEL013899 | 1-2 | 7432  | 12 | 1723  | 1,61 | 23,18 |
| AAEL013921 | 1-2 | 1873  | 4  | 940   | 2,14 | 50,19 |
| AAEL013941 | 1-2 | 5103  | 23 | 2755  | 4,51 | 53,99 |
| AAEL013959 | 1-2 | 1149  | 2  | 482   | 1,74 | 41,95 |
| AAEL013978 | 1-2 | 17401 | 39 | 8602  | 2,24 | 49,43 |
| AAEL013995 | 2-3 | 9269  | 21 | 7546  | 2,27 | 81,41 |
| AAEL014010 | 1-2 | 22231 | 43 | 11406 | 1,93 | 51,31 |
| AAEL014034 | 1-2 | 18366 | 34 | 9503  | 1,85 | 51,74 |
| AAEL014034 | 2-3 | 5737  | 9  | 1409  | 1,57 | 24,56 |
| AAEL014054 | 2-3 | 9921  | 26 | 4821  | 2,62 | 48,59 |
| AAEL014071 | 3-4 | 3557  | 8  | 791   | 2,25 | 22,24 |
| AAEL014098 | 2-3 | 18201 | 23 | 11707 | 1,26 | 64,32 |
| AAEL014109 | 1-2 | 5522  | 13 | 2837  | 2,35 | 51,38 |
| AAEL014129 | 2-3 | 5023  | 9  | 1158  | 1,79 | 23,05 |
| AAEL014149 | 2-3 | 2953  | 6  | 955   | 2,03 | 32,34 |
| AAEL014165 | 2-3 | 13913 | 34 | 5934  | 2,44 | 42,65 |
| AAEL014177 | 3-4 | 20629 | 44 | 11927 | 2,13 | 57,82 |
| AAEL014189 | 1-2 | 1729  | 3  | 507   | 1,74 | 29,32 |
| AAEL014200 | 1-2 | 3179  | 5  | 1677  | 1,57 | 52,75 |
| AAEL014221 | 2-3 | 6601  | 20 | 4102  | 3,03 | 62,14 |
| AAEL014243 | 1-2 | 11968 | 33 | 5510  | 2,76 | 46,04 |
| AAEL014265 | 1-2 | 9257  | 20 | 6982  | 2,16 | 75,42 |
| AAEL014286 | 1-2 | 9370  | 28 | 3589  | 2,99 | 38,30 |
| AAEL014301 | 5-6 | 2718  | 8  | 1558  | 2,94 | 57,32 |
| AAEL014332 | 2-3 | 25539 | 62 | 9470  | 2,43 | 37,08 |
| AAEL014354 | 2-3 | 1687  | 4  | 667   | 2,37 | 39,54 |
| AAEL014365 | 4-5 | 6699  | 19 | 4299  | 2,84 | 64,17 |
| AAEL014379 | 1-2 | 14804 | 32 | 3540  | 2,16 | 23,91 |
| AAEL014395 | 5-6 | 15088 | 35 | 6631  | 2,32 | 43,95 |
| AAEL014419 | 1-2 | 4979  | 13 | 2123  | 2,61 | 42,64 |
| AAEL014436 | 4-5 | 4341  | 10 | 2203  | 2,30 | 50,75 |
| AAEL014445 | 1-2 | 19423 | 44 | 8042  | 2,27 | 41,40 |
| AAEL014450 | 1-2 | 5776  | 12 | 3417  | 2,08 | 59,16 |
| AAEL014456 | 1-2 | 25894 | 48 | 12959 | 1,85 | 50,05 |
| AAEL014489 | 1-2 | 4921  | 17 | 2243  | 3,45 | 45,58 |
| AAEL014511 | 1-2 | 5405  | 14 | 2233  | 2,59 | 41,31 |
| AAEL014520 | 2-3 | 7094  | 20 | 5355  | 2,82 | 75,49 |
| AAEL014530 | 1-2 | 11285 | 30 | 6424  | 2,66 | 56,93 |
| AAEL014545 | 1-2 | 2204  | 9  | 1605  | 4,08 | 72,82 |
| AAEL014545 | 2-3 | 6317  | 8  | 3378  | 1,27 | 53,47 |
| AAEL014558 | 4-5 | 28896 | 67 | 17058 | 2,32 | 59,03 |
| AAEL014571 | 1-2 | 10028 | 18 | 2493  | 1,79 | 24,86 |
| AAEL014581 | 1-2 | 5042  | 8  | 1483  | 1,59 | 29,41 |
| AAEL014599 | 1-2 | 6734  | 13 | 2299  | 1,93 | 34,14 |
| AAEL014627 | 4-5 | 8005  | 23 | 3845  | 2,87 | 48,03 |
| AAEL014637 | 2-3 | 5095  | 13 | 2075  | 2,55 | 40,73 |
| AAEL014653 | 7-8 | 21200 | 34 | 10865 | 1,60 | 51,25 |

|            |     |       |    |       |      |       |
|------------|-----|-------|----|-------|------|-------|
| AAEL014666 | 3-4 | 15062 | 28 | 5454  | 1,86 | 36,21 |
| AAEL014682 | 1-2 | 4257  | 10 | 1823  | 2,35 | 42,82 |
| AAEL014694 | 2-3 | 19150 | 49 | 5778  | 2,56 | 30,17 |
| AAEL014801 | 2-3 | 11865 | 20 | 2584  | 1,69 | 21,78 |
| AAEL014820 | 2-3 | 1595  | 3  | 651   | 1,88 | 40,82 |
| AAEL014845 | 1-2 | 4259  | 9  | 2593  | 2,11 | 60,88 |
| AAEL014871 | 1-2 | 9776  | 17 | 4725  | 1,74 | 48,33 |
| AAEL014895 | 1-2 | 1112  | 2  | 162   | 1,80 | 14,57 |
| AAEL014913 | 2-3 | 9816  | 15 | 3353  | 1,53 | 34,16 |
| AAEL014931 | 1-3 | 13032 | 32 | 4135  | 2,46 | 31,73 |
| AAEL014943 | 3-4 | 9227  | 11 | 1120  | 1,19 | 12,14 |
| AAEL014963 | 3-4 | 6810  | 22 | 3790  | 3,23 | 55,65 |
| AAEL014980 | 1-2 | 4446  | 5  | 3636  | 1,12 | 81,78 |
| AAEL014998 | 4-5 | 6714  | 15 | 2374  | 2,23 | 35,36 |
| AAEL015013 | 1-2 | 16654 | 34 | 10411 | 2,04 | 62,51 |
| AAEL015039 | 3-4 | 10923 | 41 | 7045  | 3,75 | 64,50 |
| AAEL015056 | 7-8 | 5381  | 13 | 2205  | 2,42 | 40,98 |
| AAEL015080 | 1-2 | 10159 | 18 | 4450  | 1,77 | 43,80 |
| AAEL015100 | 1-2 | 8125  | 24 | 4335  | 2,95 | 53,35 |
| AAEL015110 | 4-5 | 4492  | 1  | 4421  | 0,22 | 98,42 |
| AAEL015130 | 5-6 | 17978 | 38 | 7311  | 2,11 | 40,67 |
| AAEL015142 | 2-3 | 4234  | 10 | 1470  | 2,36 | 34,72 |
| AAEL015156 | 1-2 | 11846 | 29 | 5386  | 2,45 | 45,47 |
| AAEL015170 | 2-3 | 1467  | 3  | 285   | 2,04 | 19,43 |
| AAEL015111 | 1-2 | 4741  | 13 | 1949  | 2,74 | 41,11 |
| AAEL015120 | 2-3 | 7054  | 23 | 3063  | 3,26 | 43,42 |
| AAEL015145 | 1-2 | 11754 | 27 | 5272  | 2,30 | 44,85 |
| AAEL015161 | 1-2 | 4611  | 9  | 1472  | 1,95 | 31,92 |
| AAEL015170 | 2-3 | 1467  | 3  | 285   | 2,04 | 19,43 |
| AAEL015202 | 1-2 | 3953  | 8  | 629   | 2,02 | 15,91 |
| AAEL015235 | 2-3 | 5043  | 9  | 2719  | 1,78 | 53,92 |
| AAEL015251 | 2-3 | 8140  | 12 | 2235  | 1,47 | 27,46 |
| AAEL015271 | 3-4 | 9278  | 25 | 3640  | 2,69 | 39,23 |
| AAEL015291 | 1-2 | 6197  | 12 | 2036  | 1,94 | 32,85 |
| AAEL015314 | 1-2 | 7739  | 17 | 5027  | 2,20 | 64,96 |
| AAEL015352 | 5-6 | 1012  | 1  | 636   | 0,99 | 62,85 |
| AAEL015399 | 1-2 | 1775  | 7  | 565   | 3,94 | 31,83 |
| AAEL015425 | 2-3 | 4855  | 16 | 2842  | 3,30 | 58,54 |
| AAEL015466 | 1-2 | 4724  | 11 | 1227  | 2,33 | 25,97 |
| AAEL015512 | 5-6 | 1763  | 4  | 247   | 2,27 | 14,01 |
| AAEL015575 | 1-2 | 2769  | 7  | 702   | 2,53 | 25,35 |
