# Supplementary material for: The Orthologue of the Fruitfly Sex Behaviour Gene Fruitless in the Mosquito Aedes aegypti: Evolution of Genomic Organisation and Alternative Splicing
Source: PubMed Central journal article supplement (PMC3572092; doi:10.1371/journal.pone.0048554), 2013-02-13
Supplement: pone.0048554.s010.pdf [file pone.0048554.s010.pdf]

**Table S3 - Regulatory elements in the sex-specifically regulated region of *fru* homologs**

| Element                            | Element sequence            | Identity | bp to male-specific 5'splicing donor | bp to female-specific 5'splicing donor |
|------------------------------------|-----------------------------|----------|--------------------------------------|----------------------------------------|
| <b>Dm<i>dsx</i> TRA/TRA-2 b.s.</b> | <b>TCTTCAATCAACA<br/>AA</b> |          |                                      |                                        |
| Dm <i>fru</i> TRA/TRA-2 b.s. 1     | TCATCAATCAACA               | 13/13    | 1352                                 | 238                                    |
| Dm <i>fru</i> TRA/TRA-2 b.s. 2     | TCTTCAATCAACA               | 13/13    | 1387                                 | 203                                    |
| Dm <i>fru</i> TRA/TRA-2 b.s. 3     | aCTTCAATCAACA               | 12/13    | 1540                                 | 50                                     |
| Ang <i>fru</i> TRA/TRA-2 b.s. 1    | TaAACAAaCAAac               | 9/13     | 1439                                 | 311                                    |
| Ang <i>fru</i> TRA/TRA-2 b.s. 2    | gCTTCAATCAAac               | 10/13    | 1503                                 | 247                                    |
| Ang <i>fru</i> TRA/TRA-2 b.s. 3    | ctATCAAaCAAac               | 8/13     | 1524                                 | 226                                    |
| Aeaf <i>fru</i> TRA/TRA-2 b.s. 1   | TCATCAATCtAct               | 10/13    | 1091                                 | 265                                    |
| Aeaf <i>fru</i> TRA/TRA-2 b.s. 2   | gCAcCtgTCAACA               | 9/13     | 1148                                 | 208                                    |
| Aeaf <i>fru</i> TRA/TRA-2 b.s. 3   | cCcTCAATCAgCA               | 10/13    | 1205                                 | 151                                    |
| <b>Dm TRA-2-ISS</b>                | <b>CAAGG<br/>A</b>          |          |                                      |                                        |
| Aeaf <i>fru</i> TRA-2-ISS 1        | CAAGG                       | 5/5      | 153                                  | 1137                                   |
| Aeaf <i>fru</i> TRA-2-ISS 2        | CAAGG                       | 5/5      | 485                                  | 805                                    |
| Aeaf <i>fru</i> TRA-2-ISS 3        | CAAGA                       | 5/5      | 728                                  | 562                                    |
| <b>Dm RBP1-Type B</b>              | <b>ATCCNNA<br/>T</b>        |          |                                      |                                        |
| Aeaf <i>fru</i> RBP1-Type B 1      | ATCTGAA                     | 7/7      | 351                                  | 1646                                   |
| Aeaf <i>fru</i> RBP1-Type B 2      | ATCTAGA                     | 7/7      | 266                                  | 1561                                   |
| Aeaf <i>fru</i> RBP1-Type B 3      | ATCCCCA                     | 7/7      | 61                                   | 1356                                   |
| Aeaf <i>fru</i> RBP1-Type B 4      | ATCTTTA                     | 7/7      | 454                                  | 834                                    |
| Aeaf <i>fru</i> RBP1-Type B 5      | ATCCGTA                     | 7/7      | 743                                  | 545                                    |
| Aeaf <i>fru</i> RBP1-Type B 6      | ATCTAAA                     | 7/7      | 968                                  | 320                                    |
| Aeaf <i>fru</i> RBP1-Type B 7      | ATCCGAA                     | 7/7      | 1025                                 | 263                                    |
| Aeaf <i>fru</i> RBP1-Type B 8      | ATCCGAA                     | 7/7      | 1068                                 | 220                                    |
| Aeaf <i>fru</i> RBP1-Type B 9      | ATCCGAA                     | 7/7      | 1109                                 | 179                                    |

In lower case nucleotides not matching with the consensus
