# Supplementary material for: The Orthologue of the Fruitfly Sex Behaviour Gene Fruitless in the Mosquito Aedes aegypti: Evolution of Genomic Organisation and Alternative Splicing
Source: PubMed Central journal article supplement (PMC3572092; doi:10.1371/journal.pone.0048554), 2013-02-13
Supplement: pone.0048554.s011.pdf [file pone.0048554.s011.pdf]

**Table S4** - Correspondence between MEME identified motifs and motif from RegRNA database.

| RegRNA Acc. number | RegRNA motif (consensus) | Motif class                | Footprinter motif (in grey the RegRNA motif)                                                                                   | Corresponding gene                                                                                 | Binding Protein | Drosophila homolog |
|--------------------|--------------------------|----------------------------|--------------------------------------------------------------------------------------------------------------------------------|----------------------------------------------------------------------------------------------------|-----------------|--------------------|
| <b>R0928</b>       | AAGT                     | Exonic splicing enhancer   | Motif 18 GCAAGTCT<br>Motif 18 GCAAGTCA                                                                                         | <i>Aeadsx</i><br><i>Aeafro</i>                                                                     | hnRNPG          | Hrb27C (CG10377)   |
| <b>R0612</b>       | GRYYMCYR                 | Exonic splicing enhancer   | Motif 13 GGCCACTGT                                                                                                             | <i>Aeafro</i>                                                                                      | ---             | SC35 (CG5442)      |
| <b>R0915</b>       | TGGT                     | Exonic splicing silencer   | Motif 17 CGTTGGTAT<br>Motif 21 GTGGTACTT<br>Motif 26 CATGGTGT<br>Motif 26 CATGGTGG                                             | <i>Aeafro</i><br><i>Aeafro</i><br><i>Aeadsx</i><br><i>Aeafro</i>                                   | Unknown         | ---                |
| <b>R0621</b>       | YRCRKM                   | Exonic splicing enhancer   | Motif 5 CGATCGCGTC                                                                                                             | <i>Aeafro</i>                                                                                      | SRp40           | B52 (CG10851)      |
| <b>R1033</b>       | YCA Y                    | Intronic splicing enhancer | Motif 9 GCAGCCATTC<br>Motif 13 CGCCACTGT<br>Motif 13 GGCCACTGT                                                                 | <i>Aeadsx</i><br><i>Aeafro</i><br><i>Aeafro</i>                                                    | Nova-1          | Pasilla (CG42670)  |
| <b>R0987</b>       | CTGN                     | Intronic splicing enhancer | Motif 10 GAGCCTGAAT<br>Motif 13 CGCCACTGT<br>Motif 13 GGCCACTGT<br>Motif 22 ATCTGAAA<br>Motif 35 ACTGTTCT<br>Motif 35 ACTGTTCT | <i>Aeadsx</i><br><i>Aeafro</i><br><i>Aeafro</i><br><i>Aeafro</i><br><i>Aeadsx</i><br><i>Aeafro</i> | Unknown         | ---                |
| <b>R0952</b>       | WGGG                     | Intronic splicing enhancer | Motif 17 CGTGGGTAT                                                                                                             | <i>Aeadsx</i>                                                                                      | Unknown         | ---                |
| <b>R0805</b>       | CATGG                    | Exonic splicing silencer   | Motif 26 CATGGTGT<br>Motif 26 CATGGTGG                                                                                         | <i>Aeadsx</i><br><i>Aeafro</i>                                                                     | Unknown         | ---                |
| <b>R601</b>        | WCWWC                    | Exonic splicing enhancer   | Motif 1 AACATCCATCCGAAA<br>Motif 1 AACCAACATCCGAAA<br>Motif 8 TCTACTTG TG<br>Motif 8 TCTACTAGTG<br>Motif 20 TGTCTTCCA          | <i>Aeadsx</i><br><i>Aeafro</i><br><i>Aeadsx</i><br><i>Aeafro</i><br><i>Aeafro</i>                  | SRp20           | x16 (CG10203)      |

Shaded in light grey the nucleotides of MEME motifs corresponding to RegRNA motifs

Y= C/T  
R= A/G  
K= G/T  
M= A/C  
W= A/T  
S= C/G
